# Supplementary material
Source: publisher figshare collection journal article supplement (https://tandf.figshare.com/ndownloader/files/20150867)
Supplement: Supplementary file 1 [file 20150867]

Novel pyrethrin derivatives containing hydrazone and 1,3,4-oxadiazole thioether moieties: Design, synthesis, and insecticidal activity

Zai-bo Yang 1,#, Pei Li 1,2,#,*, Yin-ju He 1

1 School of Chemistry and Chemical Engineering, Qiannan Normal University for Nationalities, Duyun 558000, P.R. China

2 Qiandongnan Engineering and Technology Research Center for Comprehensive Utilization of National Medicine/Key Laboratory for Modernization of Qiandongnan Miao & Dong Medicine, Qiandongnan Traditional Medicine Research & Development Center, Kaili University, Kaili 556011, P.R. China

Email: pl19890627@126.com

**Supplemental Materials**

**Table S1**: The preliminary insecticidal activities against *P. xylostella*, *V. aphids*, and *E. vitis* of the target compounds **6a**−**6u** at 500 mg/L.

| **Compounds** | **Insecticidal activity (%) a** | | |
| --- | --- | --- | --- |
| ***P. xylostella*** | ***V. aphids*** | ***E. vitis*** |
| **6a** | 70.00 ± 0.58 | 63.33 ± 1.02 | 93.33 ± 0.63 |
| **6b** | 66.67 ± 0.64 | 60.00± 1.03 | 63.33 ± 0.55 |
| **6c** | 100.00 ± 1.05 | 86.67 ± 1.08 | 100.00 ± 0.67 |
| **6d** | 100.00 ± 0.72 | 80.00 ± 1.12 | 100.00 ± 0.98 |
| **6e** | 66.67 ± 0.46 | 73.33 ± 0.56 | 90.00 ± 0.86 |
| **6f** | 60.00 ± 0.47 | 63.33± 0.91 | 80.00 ± 0.81 |
| **6g** | 56.67 ± 0.62 | 53.33 ± 1.04 | 70.00 ± 0.83 |
| **6h** | 50.00 ± 0.38 | 50.00 ± 0.46 | 56.67 ± 0.63 |
| **6i** | 93.33 ± 0.95 | 90.00 ± 0.79 | 100.00 ± 1.13 |
| **6j** | 100.00 ± 1.23 | 100.00 ± 0.65 | 100.00 ± 0.66 |
| **6k** | 100.00 ± 0.85 | 96.67± 0.82 | 100.00 ± 0.76 |
| **6l** | 100.00 ± 0.67 | 96.67 ± 0.93 | 100.00± 0.69 |
| **6m** | 100.00 ± 0.86 | 100.00 ± 1.03 | 100.00 ± 0.88 |
| **6n** | 96.67± 0.87 | 93.33 ± 0.89 | 100.00 ± 0.74 |
| **6o** | 96.67 ± 0.84 | 86.67 ± 0.83 | 96.67 ± 0.69 |
| **6p** | 100.00 ± 1.04 | 93.33 ± 0.56 | 100.00 ± 0.62 |
| **6q** | 100.00 ± 0.86 | 96.67 ± 0.85 | 100.00 ± 0.92 |
| **6r** | 100.00 ± 1.22 | 100.00 ± 1.04 | 100.00 ± 0.81 |
| **6s** | 100.00 ± 1.03 | 100.00 ± 0.78 | 100.00 ± 0.58 |
| **6t** | 100.00 ± 1.09 | 100.00 ± 0.59 | 100.00 ± 0.56 |
| **6u** | 100.00 ± 0.87 | 100.00 ± 0.79 | 100.00 ± 0.96 |
| **Chlorpyrifos** | 100.00 ± 1.25 | 100.00 ± 1.98 | 100.00 ± 1.87 |
| **beta Cypermethrin** | 100.00 ± 1.37 | 100.00 ± 1.65 | 100.00 ± 1.54 |
| **Spinosad** | 100.00 ± 1.26 | 100.00 ± 1.49 | 100.00 ± 1.99 |
| **Azadirachtin** | 100.00 ± 1.15 | 100.00 ± 1.43 | 100.00 ± 1.67 |

**a** Average of three replicates.

**Table S2**: The LC50 values of the target compounds **6a**−**6u** against *P. xylostella*, *V. aphids*, and *E. vitis*.

| **Compounds** | **LC50 (mg/L) a** | | |
| --- | --- | --- | --- |
| *P. xylostella* | *V. aphids* | *E. vitis* |
| **6a** | 122.50 ± 5.68 | 175.86 ± 6.84 | 20.26 ± 1.78 |
| **6b** | 157.87 ± 7.23 | 194.46 ± 7.56 | 171.82 ± 5.79 |
| **6c** | 57.81 ± 4.98 | 77.68 ± 5.58 | 6.98 ± 1.02 |
| **6d** | 64.97 ± 3.57 | 87.98 ± 4.63 | 15.74 ± 1.17 |
| **6e** | 157.70 ± 6.78 | 183.87 ± 8.79 | 28.43 ± 1.67 |
| **6f** | 184.46 ± 7.86 | 197.69 ± 8.99 | 80.88 ± 3.48 |
| **6g** | 209.74 ± 8.45 | 235.52 ± 9.16 | 99.18 ± 3.79 |
| **6h** | 312.42 ± 8.74 | 334.77 ± 9.89 | 266.58 ± 7.27 |
| **6i** | 29.88 ± 2.98 | 36.57 ± 4.46 | 7.83 ± 0.97 |
| **6j** | 6.65 ± 1.08 | 8.71 ± 1.02 | 4.67 ± 0.85 |
| **6k** | 18.42 ± 1.89 | 28.25 ± 2.14 | 6.49 ± 0.79 |
| **6l** | 16.38 ± 2.36 | 22.16 ± 2.35 | 5.00 ± 0.76 |
| **6m** | 9.75 ± 1.09 | 10.90 ± 1.36 | 6.10 ± 0.97 |
| **6n** | 30.52 ± 2.15 | 38.54 ± 2.44 | 30.07 ± 2.15 |
| **6o** | 35.92 ± 2.48 | 46.45 ± 3.08 | 35.12 ± 3.06 |
| **6p** | 28.33 ± 2.39 | 34.03 ± 3.21 | 25.01 ± 2.37 |
| **6q** | 23.57 ± 2.45 | 30.62 ± 2.89 | 11.69 ± 2.66 |
| **6r** | 7.40 ± 1.21 | 9.18 ± 1.16 | 4.67 ± 0.46 |
| **6s** | 5.23 ± 0.89 | 7.07 ± 1.18 | 1.61 ± 0.24 |
| **6t** | 9.43 ± 1.04 | 11.91 ± 2.08 | 5.87 ± 0.48 |
| **6u** | 6.63 ± 0.78 | 8.49 ± 1.06 | 3.05 ± 0.51 |
| **Chlorpyrifos** | 7.71 ± 0.96 | 11.37 ± 1.89 | 6.25 ± 0.74 |
| **beta Cypermethrin** | 12.77 ± 1.23 | 8.41 ± 1.05 | 4.67 ± 0.68 |
| **Spinosad** | 4.88 ± 0.95 | 0.99 | 7.93 ± 0.91 |
| **Azadirachtin** | 10.22 ± 1.25 | 0.96 | 14.34 ± 1.06 |

**a** Average of three replicates.

*N'-((E)-4-chlorobenzylidene)-2-((5-((1R,3R)-2,2-dimethyl-3-(2-methylprop-1-en-1-yl)cyclopropyl)-1,3,4-oxadiazol-2-yl)thio)acetohydrazide* (**6a**). White solid; mp 174−176 oC; yield 81.6 %; 1H NMR (400 MHz, DMSO-*d6*, ppm) *δ:* 11.83 (s, 1H, −NH−), 8.02 (s, 1H, −N=CH−), 7.71−7.74 (d, 2H, *J* = 11.2 Hz, Ar−H), 7.50−7.53 (d, 2H, *J* = 8.80 Hz, Ar−H), 5.01 (d, 1H, *J* = 8.80 Hz, −C=CH−), 4.56 (s, 1H, −SCH2−), 4.13 (s, 1H, −SCH2−), 1.97−2.06 (m, 2H, 2 × −CH−), 1.68 (d, 6H, *J* = 14.4 Hz, 2 × −CH3), 1.51 (s, 3H, −CH3), 1.11 (s, 3H, −CH3); 13C NMR (100 MHz, DMSO-*d6*, ppm) *δ*: 173.26, 172.48, 167.45, 148.14, 140.05, 135.74, 134.29, 126.14, 121.21, 121.00, 39.95, 39.75, 36.27, 32.43, 31.23, 30.53, 26.37, 23.47; IR (KBr, cm−1) *ν*: 3415, 3210, 3074, 2967, 2923, 7102, 1685, 1563, 1486, 1403, 1362, 1322, 1205, 1178, 1078, 1088, 1011, 991, 969, 882, 829, 782, 724; Anal. Calcd for C20H23ClN4O2S: C 57.34%, H 5.53%, N 13.37%, found: C 57.52%, H 5.68%, N 13.49%; ESI-MS: 419.2 [M+H]+.

*N'-((E)-2-chlorobenzylidene)-2-((5-((1R,3R)-2,2-dimethyl-3-(2-methylprop-1-en-1-yl)cyclopropyl)-1,3,4-oxadiazol-2-yl)thio)acetohydrazide* (**6b**)**.** White solid; mp 185−186 oC; yield 81.6%; 1H NMR (400 MHz, DMSO-*d6*, ppm) *δ*: 11.94 (s, 1H, −NH−), 8.42 (s, 1H, −N=CH−), 7.93−8.00 (m, 1H, Ar−H), 7.40−7.55 (m, 3H, Ar−H), 5.01 (d, 1H, *J* = 10.4 Hz, −C=CH−), 4.58 (s, 1H, −CH2−), 4.13 (s, 1H, −CH2−), 1.97−2.06 (m, 2H, 2 × −CH−), 1.68 (d, 6H, *J* = 14.0 Hz, 2 × −CH3), 1.14 (s, 3H, −CH3), 1.11 (s, 3H, −CH3); 13C NMR (100 MHz, DMSO-*d6*, ppm) *δ*: 173.49, 172.53, 168.24, 145.37, 138.45, 136.75, 135.19, 132.87, 132.14, 126.16, 39.71, 36.27, 32.45, 31.23, 30.57, 26.39, 26.27, 23.48; IR (KBr, cm−1) *ν*: 3439, 3209, 3067, 2952, 2925, 1682, 1595, 1574, 1485, 1445, 1377, 1284, 1222, 1203, 1154, 1116, 1051, 1032, 956, 896, 853, 757, 723, 650; Anal. Calcd for C20H23ClN4O2S: C 57.34%, H 5.53%, N 13.37%, found: C 57.56%, H 5.69%, N 13.48%; ESI-MS: 419.1 [M+H]+.

*2-((5-((1R,3R)-2,2-dimethyl-3-(2-methylprop-1-en-1-yl)cyclopropyl)-1,3,4-oxadiazol-2-yl)thio)-N'-((E)-4-fluorobenzylidene)acetohydrazide* (**6c**).White solid; mp 144−145 oC; yield 81.5%; 1H NMR (400 MHz, DMSO-*d6*, ppm) *δ*: 11.77 (s, 1H, −NH−), 8.03 (s, 1H, −N=CH−), 7.74−7.79 (m, 2H, Ar−H), 7.26−7.32 (m, 2H, Ar−H), 5.01 (d, 1H, *J* = 10.4 Hz, −C=CH−), 4.45 (s, 1H, −CH2−), 4.12 (s, 1H, −CH2−), 1.97−2.07 (m, 2H, 2 × −CH−), 1.68 (m, 6H, 2 × −CH3), 1.24 (s, 3H, −CH3), 1.15 (s, 3H, −CH3); 13C NMR (100 MHz, DMSO-*d6*, ppm) *δ*: 168.56, 167.77, 162.76, 147.80, 146.87, 143.38, 135.32, 129.81, 129.67, 129.58, 121.44, 116.51, 116.29, 35.03, 31.52, 27.71, 26.46, 25.82, 21.63, 21.53, 18.74; IR (KBr, cm−1) *ν*: 3415, 3214, 3082, 2967, 2925, 2872, 1698, 1682, 1604, 1572, 1508, 1486, 1375, 1318, 1236, 1186, 1157, 1119, 1074, 988, 970, 836, 779, 717; Anal. Calcd for C20H23FN4O2S: C 59.68%, H 5.76%, N 13.92%, found: C 59.72%, H 5.85%, N 14.08%; ESI-MS: 403.2 [M+H]+.

*(E)-2-((5-(2,2-dimethyl-3-(2-methylprop-1-en-1-yl)cyclopropyl)-1,3,4-oxadiazol-2-yl)thio)-N'-(2-fluorobenzylidene)acetohydrazide* (**6d**)**.** White solid; mp 168−169 oC; yield 81.8%; 1H NMR (400 MHz, DMSO-*d6*, ppm) *δ*: 11.87 (s, 1H, −NH−), 8.24 (s, 1H, −N=CH−), 7.89−7.94 (m, 1H, Ar−H), 7.46−7.51 (m, 1H, Ar−H), 7.27−7.33 (m, 2H, Ar−H), 5.01 (d, 1H, *J* = 8.80 Hz, −C=CH−), 4.56 (s, 1H, −CH2−), 4.12 (s, 1H, −CH2−), 1.97−2.07 (m, 2H, 2 × −CH−), 1.68 (d, 6H, *J* = 13.6 Hz, 2 × −CH3), 1.15 (s, 3H, −CH3), 1.08 (s, 3H, −CH3); 13C NMR (100 MHz, DMSO-*d6*, ppm) *δ*: 168.60, 167.87, 162.39, 140.56, 137.39, 135.32, 132.67, 126.83, 125.36, 121.94, 121.37, 116.57, 35.21, 34.93, 31.52, 27.66, 24.08, 21.60, 18.69; IR (KBr, cm−1) *ν*: 3434, 3212, 2924, 1683, 1609, 1575, 1485, 1455, 1377, 1238, 1206, 1154, 1092, 1030, 955, 898, 853, 806, 758; Anal. Calcd for C20H23FN4O2S: C 59.68%, H 5.76%, N 13.92%, found: C 59.83%, H 5.87%, N 13.87%; ESI-MS: 403.2 [M+H]+.

*(E)-N'-(4-bromobenzylidene)-2-((5-(2,2-dimethyl-3-(2-methylprop-1-en-1-yl)cyclopropyl)-1,3,4-oxadiazol-2-yl)thio)acetohydrazide* (**6e**)**.** White solid; mp 171−172 oC; yield 84.7%; 1H NMR (400 MHz, DMSO-*d6*, ppm) *δ*: 11.84 (s, 1H, −NH−), 8.00 (s, 1H, −N=CH−), 7.64 (d, 4H, *J* = 10.80 Hz, Ar−H), 5.01 (d, 1H, *J* = 10.00 Hz, −C=CH−), 4.56 (s, 1H, −CH2−), 4.13 (s, 1H, −CH2−), 1.97−2.07 (m, 2H, 2 × −CH−), 1.68 (d, 6H, *J* = 14.40 Hz, 2 × −CH3), 1.15 (s, 3H, −CH3), 1.08 (s, 3H, −CH3); 13C NMR (100 MHz, DMSO-*d6*, ppm) *δ*: 168.64, 167.78, 163.57, 146.56, 143.36, 135.34, 133.66, 132.33, 129.52, 129.30, 123.78, 121.42, 34.99, 31.51, 27.70, 26.48, 25.81, 21.63, 21.53, 18.75; IR (KBr, cm−1) *ν*: 3418, 3209, 3074, 2967, 2928, 2873, 1703, 1684, 1591, 1564, 1485, 1399, 1378, 1178, 1153, 1077, 1008, 970, 857, 825, 782, 725; Anal. Calcd for C20H23BrN4O2S: C 51.84%, H 5.00%, N 12.09%, found: C 51.98%, H 5.15%, N 12.26%; ESI-MS: 463.1 [M+H]+.

*(E)-N'-(2-bromobenzylidene)-2-((5-(2,2-dimethyl-3-(2-methylprop-1-en-1-yl)cyclopropyl)-1,3,4-oxadiazol-2-yl)thio)acetohydrazide* (**6f**).White solid; mp 192−193 oC; yield 83.6%; 1H NMR (400 MHz, DMSO-*d6*, ppm) *δ*: 11.95 (s, 1H, −NH−), 8.38 (s, 1H, −N=CH−), 7.92−7.98 (q, 1H, Ar−H), 7.70 (d, 1H, *J* = 10.80 Hz, Ar−H), 7.35−7.49 (m, 2H, Ar−H), 5.01 (d, 1H, *J* = 9.60 Hz, −C=CH−), 4.58 (s, 1H, −CH2−), 4.13 (s, 1H, −CH2−), 1.97−2.40 (m, 2H, 2 × −CH−), 1.68 (d, 6H, *J* = 14.00 Hz, 2 × −CH3), 1.24 (s, 3H, −CH3), 1.15 (s, 3H, −CH3); 13C NMR (100 MHz, DMSO-*d6*, ppm) *δ*: 173.48, 172.53, 167.42, 140.08, 138.41, 137.87, 137.19, 136.98, 133.35, 132.50, 128.61, 126.17, 39.73, 36.27, 32.44, 31.24, 30.57, 26.39, 26.28, 23.49; IR (KBr, cm−1) *ν*: 3436, 3208, 3063, 2951, 2924, 1687, 1573, 1485, 1463, 1376, 1280, 1221, 1154, 1115, 1076, 1042, 955, 895, 853, 755, 714; Anal. Calcd for C20H23BrN4O2S: C 51.84%, H 5.00%, N 12.09%, found: C 51.97%, H 5.21%, N 12.32%; ESI-MS: 463.1 [M+H]+.

*(E)-2-((5-(2,2-dimethyl-3-(2-methylprop-1-en-1-yl)cyclopropyl)-1,3,4-oxadiazol-2-yl)thio)-N'-(4-nitrobenzylidene)acetohydrazide* (**6g**). White solid; mp206−207 oC; yield 86.7%; 1H NMR (400 MHz, DMSO-*d6*, ppm) *δ*: 12.05 (s, 1H, −NH−), 8.29 (q, 2H, Ar−H), 8.14 (s, 1H, −N=CH−), 7.97 (d, 1H, *J* = 11.6 Hz, Ar−H), 5.01 (d, 1H, *J* = 10.40 Hz, −C=CH−), 4.60 (s, 1H, −CH2−), 4.17 (s, 1H, −CH2−), 1.97−2.06 (m, 2H, 2 × −CH−), 1.68 (d, 6H, *J* = 12.80 Hz, 2 × −CH3), 1.15 (s, 3H, −CH3), 1.01 (s, 3H, −CH3); 13C NMR (100 MHz, DMSO-*d6*, ppm) *δ*: 173.74, 172.57, 167.39, 153.08, 146.92, 145.40, 140.10, 133.36, 133.14, 129.33, 129.25, 126.15, 39.68, 36.27, 32.46, 31.23, 30.55, 26.38, 26.28, 23.49; IR (KBr, cm−1) *ν*: 3434, 3214, 3076, 2965, 2924, 2876, 1705, 1688, 1586, 1563, 1525, 1488, 1362, 1343, 1221, 1236, 1186, 1116, 1082, 956, 856, 837, 750, 726; Anal. Calcd for C20H23N5O4S: C 55.93%, H 5.40%, N 16.31%, found: C 56.08%, H 5.53%, N 16.48%; ESI-MS: 430.1 [M+H]+.

*(E)-2-((5-(2,2-dimethyl-3-(2-methylprop-1-en-1-yl)cyclopropyl)-1,3,4-oxadiazol-2-yl)thio)-N'-(2-nitrobenzylidene)acetohydrazide* (**6h**).White solid;mp 216−217 oC; yield 85.2%; 1H NMR (400 MHz, DMSO-*d6*, ppm) *δ*: 12.03 (s, 1H, −NH−), 8.42 (s, 1H, −N=CH−), 8.06 (q, 2H, Ar−H), 7.65−7.83 (m, 2H, Ar−H), 5.01 (d, 1H, *J* = 10.40 Hz, −C=CH−), 4.56 (s, 1H, −CH2−), 4.05 (s, 1H, −CH2−), 1.97−2.07 (m, 2H, 2 × −CH−), 1.68 (d, 6H, *J* = 12.80 Hz, 2 × −CH3), 1.15 (s, 3H, −CH3), 1.08 (s, 3H, −CH3); 13C NMR (100 MHz, DMSO-*d6*, ppm) *δ*: 168.81, 167.73, 163.66, 148.50, 143.46, 140.10, 135.32, 134.08, 131.28, 128.57, 125.08, 121.39, 34.96, 31.49, 27.70, 26.44, 26.17, 25.81, 21.62, 18.71; IR (KBr, cm−1) *ν*: 3436, 3210, 2954, 2925, 2869, 1686, 1572, 1525, 1485, 1444, 1346, 1312, 1222, 1203, 1153, 1073, 962, 859, 786, 746, 701; Anal. Calcd for C20H23N5O4S: C 55.93%, H 5.40%, N 16.31%, found: C 56.13%, H 5.62%, N 16.48%; ESI-MS: 430.2 [M+H]+.

*(E)-N'-(2,4-dichlorobenzylidene)-2-((5-(2,2-dimethyl-3-(2-methylprop-1-en-1-yl)cyclopropyl)-1,3,4-oxadiazol-2-yl)thio)acetohydrazide* (**6i**).White solid; mp 224−225 oC; yield 85.9%; 1H NMR (400 MHz, DMSO-*d6*, ppm) *δ*: 11.97 (s, 1H, −NH−), 8.36 (s, 1H, −N=CH−), 7.96 (q, 1H, Ar−H), 7.72 (s, 1H, Ar−H), 7.51 (d, 1H, *J* = 11.20 Hz, Ar−H), 5.01 (d, 1H, *J* = 10.40 Hz, −C=CH−), 4.57 (s, 1H, −CH2−), 4.13 (s, 1H, −CH2−), 1.96−2.06 (m, 2H, 2 × −CH−), 1.63 (d, 6H, *J* = 19.20 Hz, 2 × −CH3), 1.15 (s, 3H, −CH3), 1.07 (s, 3H, −CH3); 13C NMR (100 MHz, DMSO-*d6*, ppm) *δ*: 168.78, 167.79, 163.56, 142.64, 139.52, 135.58, 134.39, 134.22, 130.72, 129.89, 128.56, 128.48, 34.91, 31.52, 27.72, 26.47, 25.82, 21.62, 21.52, 18.73; IR (KBr, cm−1) *ν*: 3436, 3195, 3088, 2951, 2915, 1680, 1598, 1566, 1485, 1468, 1377, 1352, 1260, 1153, 1099, 1050, 960, 937, 896, 854, 784, 773; Anal. Calcd for C20H22Cl2N4O2S: C 52.98%, H 4.89%, N 12.36%, found: C 53.17%, H 4.97%, N 12.58%; ESI-MS: 453.2 [M+H]+.

*(E)-N'-(2,4-difluorobenzylidene)-2-((5-(2,2-dimethyl-3-(2-methylprop-1-en-1-yl)cyclopropyl)-1,3,4-oxadiazol-2-yl)thio)acetohydrazide* (**6j**). White solid;mp 205−206 oC; yield 84.9 %; 1H NMR (400 MHz, DMSO-*d6*, ppm) *δ*: 11.86 (s, 1H, −NH−), 8.18 (s, 1H, −N=CH−), 7.88−8.00 (m, 1H, Ar−H), 7.35 (t, 1H, *J1* = 12.40 Hz, *J2* = 13.20 Hz, Ar−H), 7.20 (t, 1H, *J1* = 10.80 Hz, *J2* = 11.20 Hz, Ar−H), 5.01 (d, 1H, *J* = 9.60 Hz, −C=CH−), 4.55 (s, 1H, −CH2−), 4.12 (s, 1H, −CH2−), 1.97−2.06 (m, 2H, 2 × −CH−), 1.68 (m, 6H, 2 × −CH3), 1.15 (s, 3H, −CH3), 1.08 (s, 3H, −CH3); 13C NMR (100 MHz, DMSO-*d6*, ppm) *δ*: 168.65, 167.91, 163.40, 139.84, 136.61, 135.38, 128.55, 121.41, 118.86, 118.79, 113.24, 113.02, 34.90, 31.52, 27.93, 27.71, 26.49, 25.79, 21.62, 21.52; IR (KBr, cm−1) *ν*: 3416, 3212, 3078, 2969, 2926, 1687, 1616, 1576, 1486, 1428, 1406, 1377, 1302, 1279, 1211, 1154, 1141, 1088, 965, 895, 849, 815, 782, 730; Anal. Calcd for C20H22F2N4O2S: C 57.13%, H 5.27%, N 13.32%, found: C 57.34%, H 5.46%, N 13.51%; ESI-MS: 421.1 [M+H]+.

*5-(E)-N'-(4-chloro-2-fluorobenzylidene)-2-((5-(2,2-dimethyl-3-(2-methylprop-1-en-1-yl)cyclopropyl)-1,3,4-oxadiazol-2-yl)thio)acetohydrazide* (**6k**)*.* White solid, mp 211−212 oC; yield 81.3 %; 1H NMR (400 MHz, DMSO-*d6*, ppm) *δ*: 11.91 (s, 1H, −NH−), 8.18 (s, 1H, −N=CH−), 7.85−7.95 (m, 1H, Ar−H), 7.54 (q, 1H, Ar−H), 7.38 (d, 1H, *J* = 11.20 Hz, Ar−H), 5.01 (d, 1H, *J* = 10.40 Hz, −C=CH−), 4.56 (s, 1H, −CH2−), 4.13 (s, 1H, −CH2−), 1.96−2.06 (m, 2H, 2 × −CH−), 1.68 (d, 6H, *J* = 14.00 Hz, 2 × −CH3), 1.24 (s, 3H, −CH3), 1.15 (s, 3H, −CH3); 13C NMR (100 MHz, DMSO-*d6*, ppm) *δ*: 168.36, 163.12, 159.25, 139.22, 136.05, 135.58, 135.48, 135.37, 134.98, 127.75, 125.54, 121.05, 116.96, 39.03, 34.85, 31.18, 27.38, 26.14, 25.47, 21.28, 18.38, 15.32; IR (KBr, cm−1) *ν*: 3416, 3210, 2970, 2926, 2872, 1686, 1608, 1571, 1483, 1449, 1411, 1377, 1272, 1224, 1155, 1106, 1075, 960, 902, 854, 818, 782, 716; Anal. Calcd for C20H22ClFN4O2S: C 54.98%, H 5.08%, N 12.82%, found: C 55.12%, H 5.14%, N 12.81%; ESI-MS: 437.1 [M+H]+.

*(E)-N'-(2-chloro-4-fluorobenzylidene)-2-((5-(2,2-dimethyl-3-(2-methylprop-1-en-1-yl)cyclopropyl)-1,3,4-oxadiazol-2-yl)thio)acetohydrazide* (**6l**)**.** White solid; mp 239−240 oC; yield 82.7%; 1H NMR (400 MHz, DMSO-*d6*, ppm) *δ*: 11.93 (s, 1H, −NH−), 8.36 (s, 1H, −N=CH−), 7.96−8.06 (m, 1H, Ar−H), 7.54−7.58 (q, 1H, Ar−H), 7.30−7.37 (m, 1H, Ar−H), 5.01 (d, 1H, *J* = 9.60 Hz, −C=CH−), 4.57 (s, 1H, −CH2−), 4.12 (s, 1H, −CH2−), 1.97−2.06 (m, 2H, 2 × −CH−), 1.68 (d, 6H, *J* = 14.00 Hz, 2 × −CH3), 1.15 (s, 3H, −CH3), 1.10 (s, 3H, −CH3); 13C NMR (100 MHz, DMSO-*d6*, ppm) *δ*: 168.68, 167.75, 164.33, 142.77, 139.61, 135.30, 134.40, 134.29, 129.18, 129.08, 121.38, 117.46, 115.42, 35.16, 31.51, 27.69, 26.46, 25.79, 21.61, 21.50, 18.70; IR (KBr, cm−1) *ν*:3436, 3208, 3073, 2971, 2925, 1684, 1601, 1573, 1486, 1377, 1284, 1248, 1208, 1155, 1041, 959, 936, 911, 856, 819, 782, 725; Anal. Calcd for C20H22ClFN4O2S: C 54.98%, H 5.08%, N 12.82%, found: C 55.11%, H 5.23%, N 12.97%; ESI-MS: 437.2 [M+H]+.

*(E)-2-((5-(2,2-dimethyl-3-(2-methylprop-1-en-1-yl)cyclopropyl)-1,3,4-oxadiazol-2-yl)thio)-N'-(2,3,5-trichlorobenzylidene)acetohydrazide* (**6m**).White solid; mp 241−242 oC; yield, 87.3%; 1H NMR (400 MHz, DMSO-*d6*, ppm) *δ*: 12.07 (s, 1H, −NH−), 8.37 (s, 1H, −N=CH−), 7.83−7.99 (m, 2H, Ar−H), 5.00 (d, 1H, *J* = 10.00 Hz, −C=CH−), 4.62 (s, 1H, −CH2−), 3.33 (s, 1H, −CH2−), 1.96−2.06 (m, 2H, 2 × −CH−), 1.67 (d, 6H, *J* = 14.80 Hz, 2 × −CH3), 1.15 (s, 3H, −CH3), 1.10 (s, 3H, −CH3); 13C NMR (100 MHz, DMSO-*d6*, ppm) *δ*: 169.02, 167.90, 162.57, 142.20, 139.02, 135.31, 133.98, 132.98, 131.32, 130.51, 125.36, 121.36, 35.13, 31.50, 27.75, 26.46, 25.80, 21.62, 21.51, 18.70; IR (KBr, cm−1) *ν*:3439, 3210, 3069, 2970, 2925, 1690, 1573, 1550, 1486, 1448, 1394, 1376, 1235, 1189, 1154, 1050, 1006, 960, 937, 860, 823, 783, 723; Anal. Calcd for C20H21Cl3N4O2S: C 49.24%, H 4.34%, N 11.48%, found: C 49.63%, H 4.58%, N 11.64%; ESI-MS: 487.0 [M+H]+.

*(E)-N'-(2-chloro-5-nitrobenzylidene)-2-((5-(2,2-dimethyl-3-(2-methylprop-1-en-1-yl)cyclopropyl)-1,3,4-oxadiazol-2-yl)thio)acetohydrazide* (**6n**)**.** White solid; mp 251−252 oC; yield 83.9%; 1H NMR (400 MHz, DMSO-*d6*, ppm) *δ*: 12.12 (s, 1H, −NH−), 8.61−8.67 (s, 1H, Ar−H), 8.43 (s, 1H, −N=CH−), 8.24 (d, 1H, *J* = 12.00 Hz, Ar−H), 7.85 (d, 1H, *J* = 12.00 Hz, Ar−H), 5.01 (d, 1H, *J* = 8.80 Hz, −C=CH−), 4.64 (s, 1H, −CH2−), 4.16 (s, 1H, −CH2−), 1.96−2.05 (m, 2H, 2 × −CH−), 1.67 (d, 6H, *J* = 13.60 Hz, 2 × −CH3), 1.15 (s, 3H, −CH3), 1.10 (s, 3H, −CH3); 13C NMR (100 MHz, DMSO-*d6*, ppm) *δ*: 168.88, 167.74, 162.57, 147.26, 141.77, 139.58, 138.82, 135.33, 133.18, 132.07, 125.85, 121.36, 35.16, 31.51, 27.72, 26.48, 26.11, 24.06, 21.60, 18.69; IR (KBr, cm−1) *ν*: 3435, 3213, 3099, 2925, 1686, 1607, 1570, 1527, 1486, 1458, 1348, 1297, 1218, 1153, 1047, 960, 940, 827, 740; Anal. Calcd for C20H22ClN5O4S: C 51.78%, H 4.78%, N 15.10%, found: C 51.86%, H 4.93%, N 15.33%; ESI-MS: 464.1 [M+H]+.

*(E)-N'-(2,4-dibromobenzylidene)-2-((5-(2,2-dimethyl-3-(2-methylprop-1-en-1-yl)cyclopropyl)-1,3,4-oxadiazol-2-yl)thio)acetohydrazide* (**6o**)**.** white solid; mp 224−225 oC; yield 84.7%; 1H NMR (400 MHz, DMSO-*d6*, ppm) *δ*: 12.00 (s, 1H, −NH−), 8.32 (s, 1H, −N=CH−), 7.83−7.95 (m, 2H, Ar−H), 7.66 (d, 1H, *J* = 11.20 Hz, Ar−H), 5.00 (d, 1H, *J* = 10.00 Hz, −C=CH−), 4.56 (s, 1H, −CH2−), 4.13 (s, 1H, −CH2−), 1.95−2.08 (m, 2H, 2 × −CH−), 1.67 (d, 6H, *J* = 14.80 Hz, 2 × −CH3), 1.19 (s, 3H, −CH3), 1.14 (s, 3H, −CH3); 13C NMR (100 MHz, DMSO-*d6*, ppm) *δ*: 168.71, 167.87, 162.58, 145.06, 141.93, 135.37, 132.50, 131.65, 128.96, 124.20, 121.35, 118.56, 34.92, 31.51, 27.93, 26.49, 25.54, 21.60, 18.74, 16.34; IR (KBr, cm−1) *ν*:3436, 3190, 3081, 2949, 2912, 1679, 1596, 1576, 1564, 1484, 1461, 1382, 1257, 1236, 1151, 1076, 1037, 962, 938, 846, 829, 783; Anal. Calcd for C20H22Br2N4O2S: C 44.30%, H 4.09%, N 10.33%, found: C 44.59%, H 4.21%, N 10.46%; ESI-MS: 543.1 [M+H]+.

*(E)-2-((5-(2,2-dimethyl-3-(2-methylprop-1-en-1-yl)cyclopropyl)-1,3,4-oxadiazol-2-yl)thio)-N'-(2-fluoro-5-nitrobenzylidene)acetohydrazide* (**6p**).white solid; mp 247−248 oC; yield 83.5%; 1H NMR (400 MHz, DMSO-*d6*, ppm) *δ*: 12.07 (s, 1H, −NH−), 8.61−8.68 (m, 1H, Ar−H), 8.42 (s, 1H, −N=CH−), 8.33−8.36 (m, 1H, Ar−H), 8.24 (s, 1H, Ar−H), 7.62 (t, 1H, *J1* = *J2* = 12.40 Hz, Ar−H), 5.01 (d, 1H, *J* = 10.00 Hz, −C=CH−), 4.63 (s, 1H, −CH2−), 4.16 (s, 1H, −CH2−), 1.97−2.06 (m, 2H, 2 × −CH−), 1.67 (d, 6H, *J* = 13.60 Hz, 2 × −CH3), 1.15 (s, 3H, −CH3), 1.11 (s, 3H, −CH3); 13C NMR (100 MHz, DMSO-*d6*, ppm) *δ*: 168.89, 167.89, 162.60, 144.83, 138.55, 135.58, 135.29, 127.35, 123.31, 122.22, 121.40, 118.49, 118.25, 35.15, 31.50, 27.74, 26.46, 25.80, 21.60, 21.50, 18.69; IR (KBr, cm−1) *ν*: 3434, 3214, 3084, 2971, 2927, 2872, 1687, 1609, 1576, 1533, 1485, 1350, 1315, 1251, 1209, 1155, 1116, 1075, 960, 831, 782, 746; Anal. Calcd for C20H22FN5O4S: C 53.68%, H 4.96%, N 15.65%, found: C 53.79%, H 5.15%, N 15.83%; ESI-MS: 448.2 [M+H]+.

*(E)-N'-(4-bromo-2-fluorobenzylidene)-2-((5-(2,2-dimethyl-3-(2-methylprop-1-en-1-yl)cyclopropyl)-1,3,4-oxadiazol-2-yl)thio)acetohydrazide* (**6q**)**.** White solid; mp 232−233 oC; yield 85.2%; 1H NMR (400 MHz, DMSO-*d6*, ppm) *δ*: 11.91 (s, 1H, −NH−), 8.17 (s, 1H, −N=CH−), 7.78−7.88 (m, 1H, Ar−H), 7.68 (d, 1H, *J* = 14.00 Hz, Ar−H), 7.51 (d, 1H, *J* = 11.20 Hz, Ar−H), 5.01 (d, 1H, *J* = 9.20 Hz, −C=CH−), 4.55 (s, 1H, −CH2−), 4.13 (s, 1H, −CH2−), 1.97−2.06 (m, 2H, 2 × −CH−), 1.68 (d, 6H, *J* = 14.40 Hz, 2 × −CH3), 1.15 (s, 3H, −CH3), 1.12 (s, 3H, −CH3); 13C NMR (100 MHz, DMSO-*d6*, ppm) *δ*: 168.69, 167.75, 162.60, 139.64, 136.48, 135.30, 128.70, 128.26, 124.26, 124.04, 121.50, 121.38, 120.07, 34.84, 31.50, 27.70, 26.46, 25.81, 21.61, 21.51, 18.71; IR (KBr, cm−1) *ν*: 3423, 3212, 3100, 2970, 2926, 1684, 1604, 1574, 1482, 1407, 1378, 1221, 1155, 1104, 1068, 960, 880, 855, 816, 782; Anal. Calcd for C20H22BrFN4O2S: C 49.90%, H 4.61%, N 11.64%, found: C 49.98%, H 4.82%, N 11.76%; ESI-MS: 481.1 [M+H]+.

*(E)-2-((5-(2,2-dimethyl-3-(2-methylprop-1-en-1-yl)cyclopropyl)-1,3,4-oxadiazol-2-yl)thio)-N'-(2-(trifluoromethyl)benzylidene)acetohydrazide* (**6r**). White solid; mp 169−170 oC; yield 82.6%; 1H NMR (400 MHz, DMSO-*d6*, ppm) *δ*: 12.00 (s, 1H, −NH−), 8.39 (s, 1H, −N=CH−), 8.14−8.21 (m, 1H, Ar−H), 7.62−7.83 (m, 3H, Ar−H), 5.01 (d, 1H, *J* = 8.80 Hz, −C=CH−), 4.60 (s, 1H, −CH2−), 4.14 (s, 1H, −CH2−), 1.97−2.06 (m, 2H, 2 × −CH−), 1.67 (m, 6H, *J* = 14.80 Hz, 2 × −CH3), 1.23 (s, 3H, −CH3), 1.14 (s, 3H, −CH3); 13C NMR (100 MHz, DMSO-*d6*, ppm) *δ*: 168.80, 167.89, 162.60, 142.79, 139.74, 135.35, 135.29, 133.32, 132.20, 130.78, 130.59, 127.63, 127.37, 127.02, 126.46, 121.37, 35.16, 31.18, 31. 51, 27.67, 26.47, 25.78, 21.60, 21.50, 18.69; IR (KBr, cm−1) *ν*: 3419, 3200, 3108, 2970, 2940, 2879, 1678, 1615, 1576, 1481, 1454, 1408, 1380, 1317, 1281, 1222, 1209, 1165, 1120, 1061, 1034, 962, 942, 898, 854, 811, 777, 750; Anal. Calcd for C21H23F3N4O2S: C 55.74%, H 5.12%, N 12.38%, found: C 56.02%, H 5.25%, N 12.47%; ESI-MS: 453.2 [M+H]+.

*(E)-2-((5-(2,2-dimethyl-3-(2-methylprop-1-en-1-yl)cyclopropyl)-1,3,4-oxadiazol-2-yl)thio)-N'-(4-(trifluoromethyl)benzylidene)acetohydrazide* (**6s**).White solid; mp 156−157 oC; yield 84.1%; 1H NMR (400 MHz, DMSO-*d6*, ppm) *δ*: 12.06 (s, 1H, −NH−), 8.27−8.31 (q, 2H, Ar−H), 8.13 (s, 1H, −N=CH−), 7.97 (d, 2H, *J* = 11.60 Hz, Ar−H), 5.01 (d, 1H, *J* = 10.40 Hz, −C=CH−), 4.60 (s, 1H, −CH2−), 4.17 (s, 1H, −CH2−), 1.97−2.06 (m, 2H, 2 × −CH−), 1.67 (d, 6H, *J* = 13.20 Hz, 2 × −CH3), 1.15 (s, 3H, −CH3), 1.08 (s, 3H, −CH3); 13C NMR (100 MHz, DMSO-*d6*, ppm) *δ*: 168.94, 167.89, 162.37, 148.42, 148.29, 145.34, 142.19, 140.78, 140.62, 135.33, 128.57, 128.35, 124.49, 121.37, 35.21, 34.90, 31.52, 27.69, 26.48, 25.77, 21.62, 18.71; IR (KBr, cm−1) *ν*: 3419, 3214, 3075, 2923, 2875, 1705, 1687, 1616, 1563, 1524, 1488, 1457, 1410, 1362, 1343, 1326, 1236, 1186, 1108, 1081, 1009, 992, 973, 956, 882, 855, 836, 750, 726; Anal. Calcd for C21H23F3N4O2S: C 55.74%, H 5.12%, F 12.60%, N 12.38%; found: C 55.96%, H 5.33%, F 12.73%, N 12.48%; ESI-MS: 452.0 [M+H]+.

*(E)-2-((5-(2,2-dimethyl-3-(2-methylprop-1-en-1-yl)cyclopropyl)-1,3,4-oxadiazol-2-yl)thio)-N'-(2-(trifluoromethoxy)benzylidene)acetohydrazide* (**6t**).White solid; mp 184−185 oC; yield 82.7%; 1H NMR (400 MHz, DMSO-*d6*, ppm) *δ*: 11.91 (s, 1H, −NH−), 8.30 (s, 1H, −N=CH−), 7.99−8.05 (m, 1H, Ar−H), 7.45−7.61 (m, 3H, Ar−H), 5.01 (d, 1H, *J*= 10.40 Hz, −C=CH−), 4.58 (s, 1H, −CH2−), 4.13 (s, 1H, −CH2−), 1.97−2.06 (m, 2H, 2 × −CH−), 1.66−1.69 (d, 6H, *J*= 14.00 Hz, 2 × −CH3), 1.23 (s, 3H, −CH3), 1.15 (s, 3H, −CH3); 13C NMR (100 MHz, DMSO-*d6*, ppm) *δ*: 168.66, 167.87, 162.63, 147.19, 137.90, 135.34, 135.28, 132.37, 132.15, 128.58, 127.39, 127.21, 127.06, 122.33, 122.26, 121.80, 121.37, 119.25, 35.16, 31.50, 27.90, 26.46, 25.78, 24.06, 21.59, 18.69; IR (KBr, cm−1) *ν*: 3421, 3215, 2971, 2927, 1684, 1608, 1575, 1486, 1452, 1379, 1257, 1214, 1169, 1092, 956, 923, 897, 852, 812, 764; Anal. Calcd for C21H23F3N4O3S: C 53.84%, H 4.95%, N 11.96%, found: C 53.97%, H 5.03%, N 12.06%; ESI-MS: 469.2 [M+H]+.

*(E)-2-((5-(2,2-dimethyl-3-(2-methylprop-1-en-1-yl)cyclopropyl)-1,3,4-oxadiazol-2-yl)thio)-N'-(4-(trifluoromethoxy)benzylidene)acetohydrazide* (**6u**).White solid; mp 164−165 oC; yield 81.6%; 1H NMR (400 MHz, DMSO-*d6*, ppm) *δ*: 11.86 (s, 1H, −N=CH−), 8.06 (s, 1H, −NH−), 7.83 (d, 2H, *J* = 11.20 Hz, Ar−H), 7.43 (d, 2H, *J* = 10.80 Hz, Ar−H), 5.01 (d, 1H, *J* = 10.40 Hz, −C=CH−), 4.56 (s, 1H, −CH2−), 4.14 (s, 1H, −CH2−), 1.96−2.06 (m, 2H, 2 × −CH−), 1.67 (d, 6H, *J* = 13.20 Hz, 2 × −CH3), 1.14 (s, 3H, −CH3), 1.10 (s, 3H, −CH3); 13C NMR (100 MHz, DMSO-*d6*, ppm) *δ*: 168.64, 167.73, 162.42, 149.80, 146.14, 142.90, 135.33, 135.64, 133.64, 129.49, 129.25, 121.79, 121.74, 119.18, 118.58, 35.19, 31.48, 27.68, 26.46, 25.54, 24.05, 21.58, 18.69; IR (KBr, cm−1) *ν*: 3436, 3212, 2971, 2927, 1681, 1614, 1575, 1509, 1486, 1379, 1262, 1202, 1164, 1075, 1016, 959, 921, 845, 782; Anal. Calcd for C21H23F3N4O3S: C 53.84%, H 4.95%, N 11.96%, found: C 54.04%, H 4.99%, N 12.12%; ESI-MS: 469.2 [M+H]+.


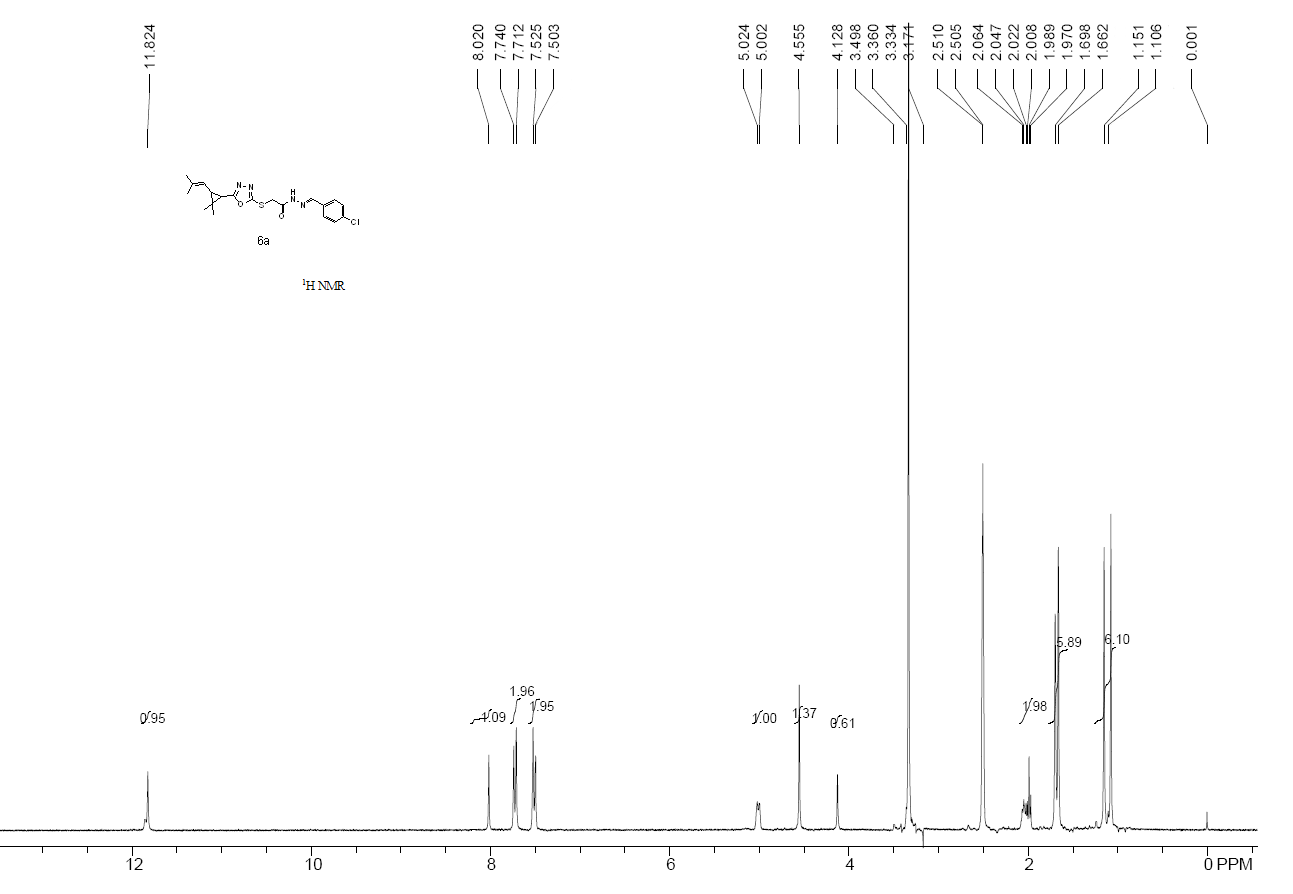


**Figure S**  1. 1H NMR of compound 6a


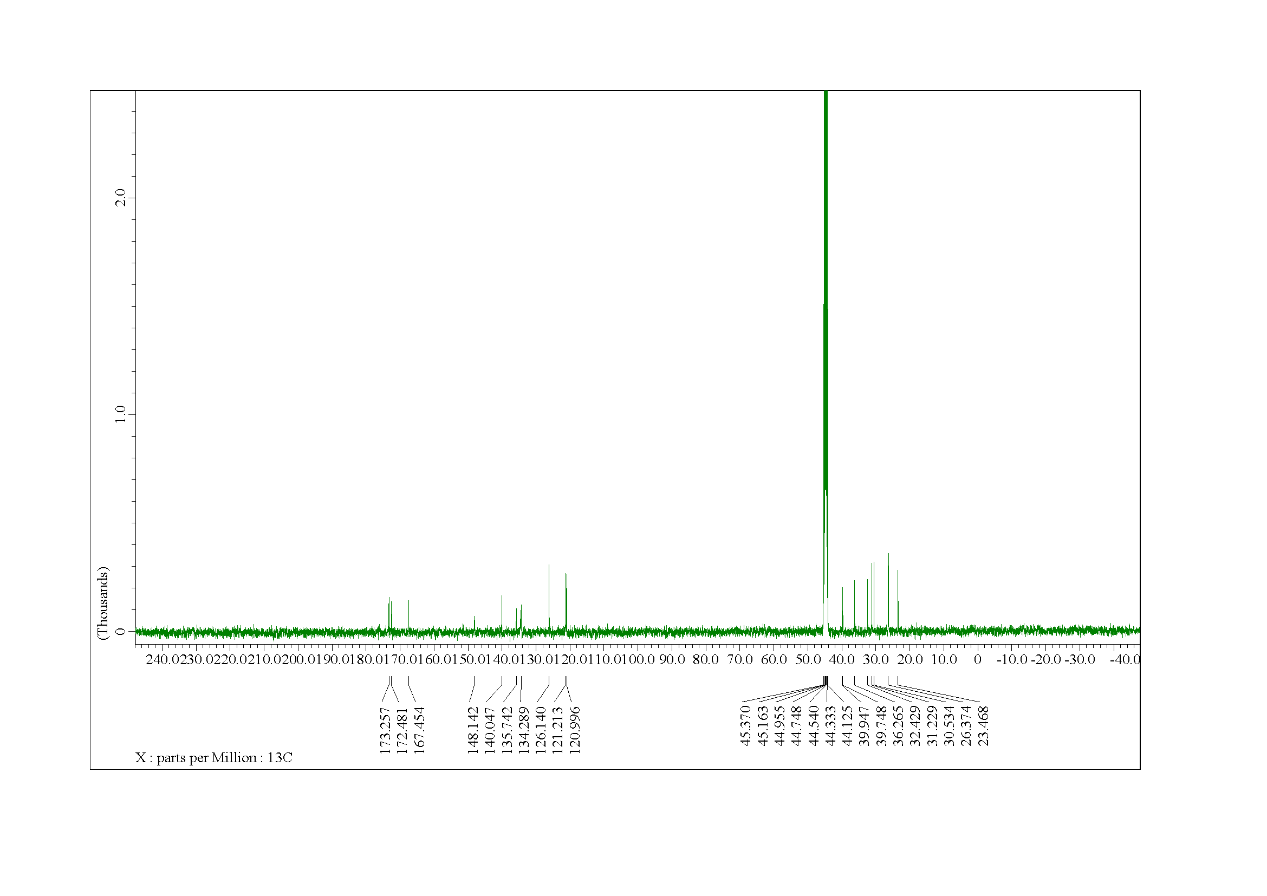


**Figure S**  2. 13C NMR of compound 6a


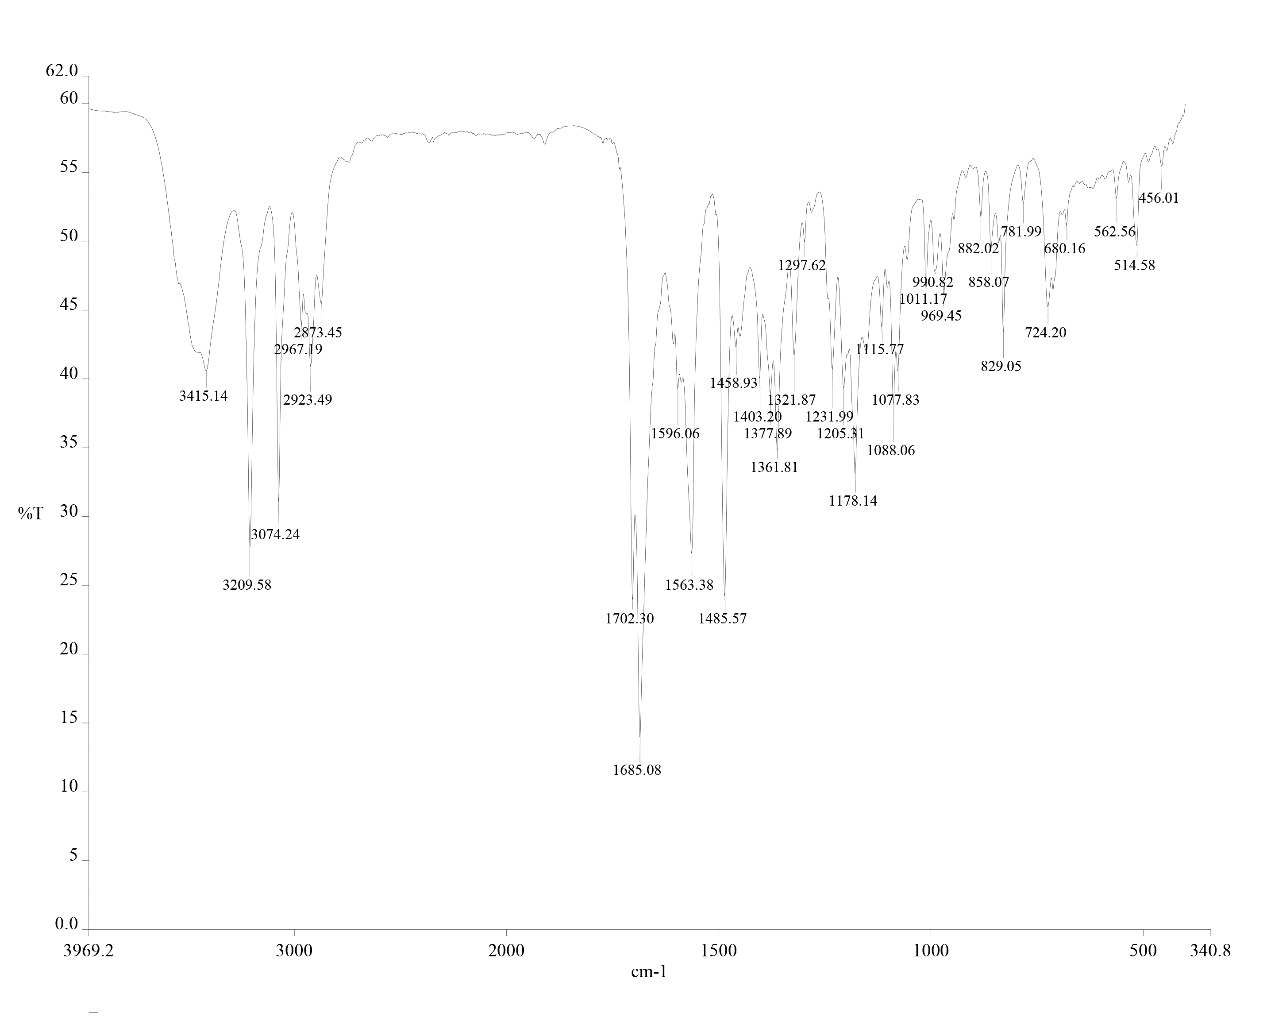


**Figure S**  3. IR of compound 6a


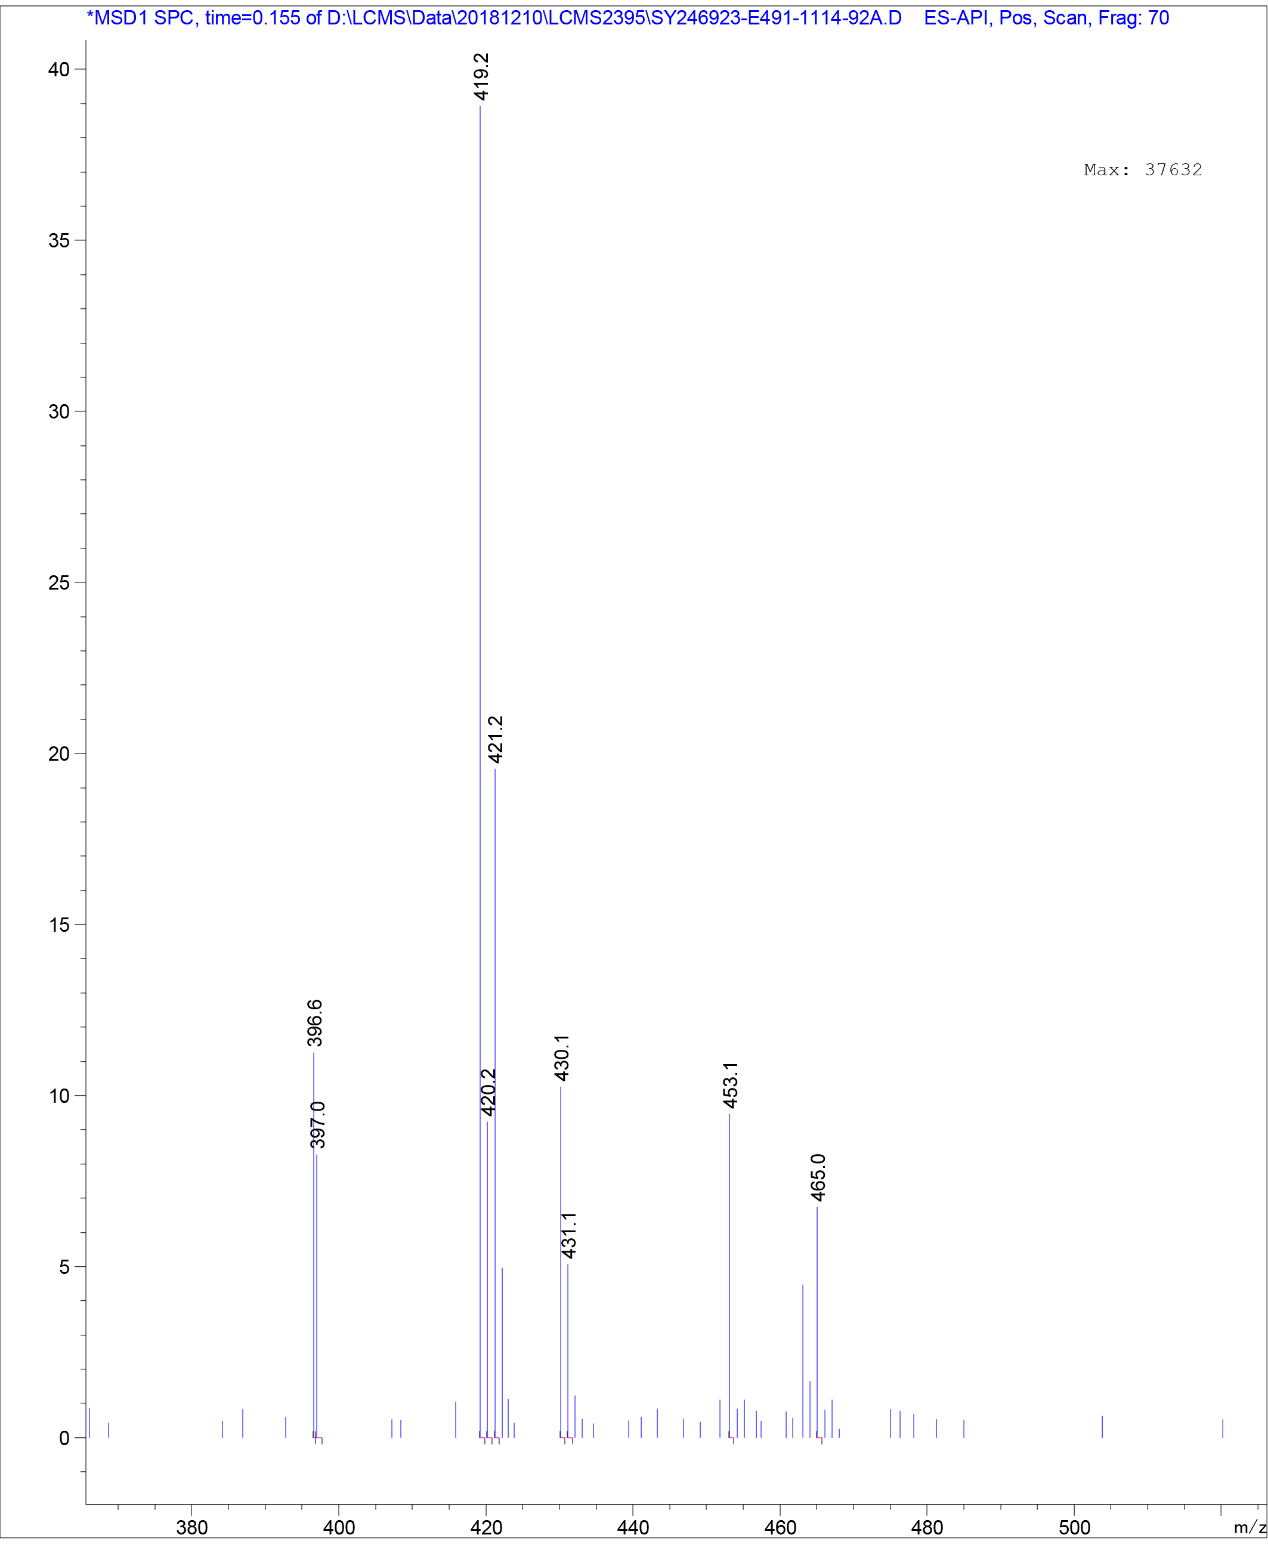


**Figure S**  4. ESI-MS of compound 6a


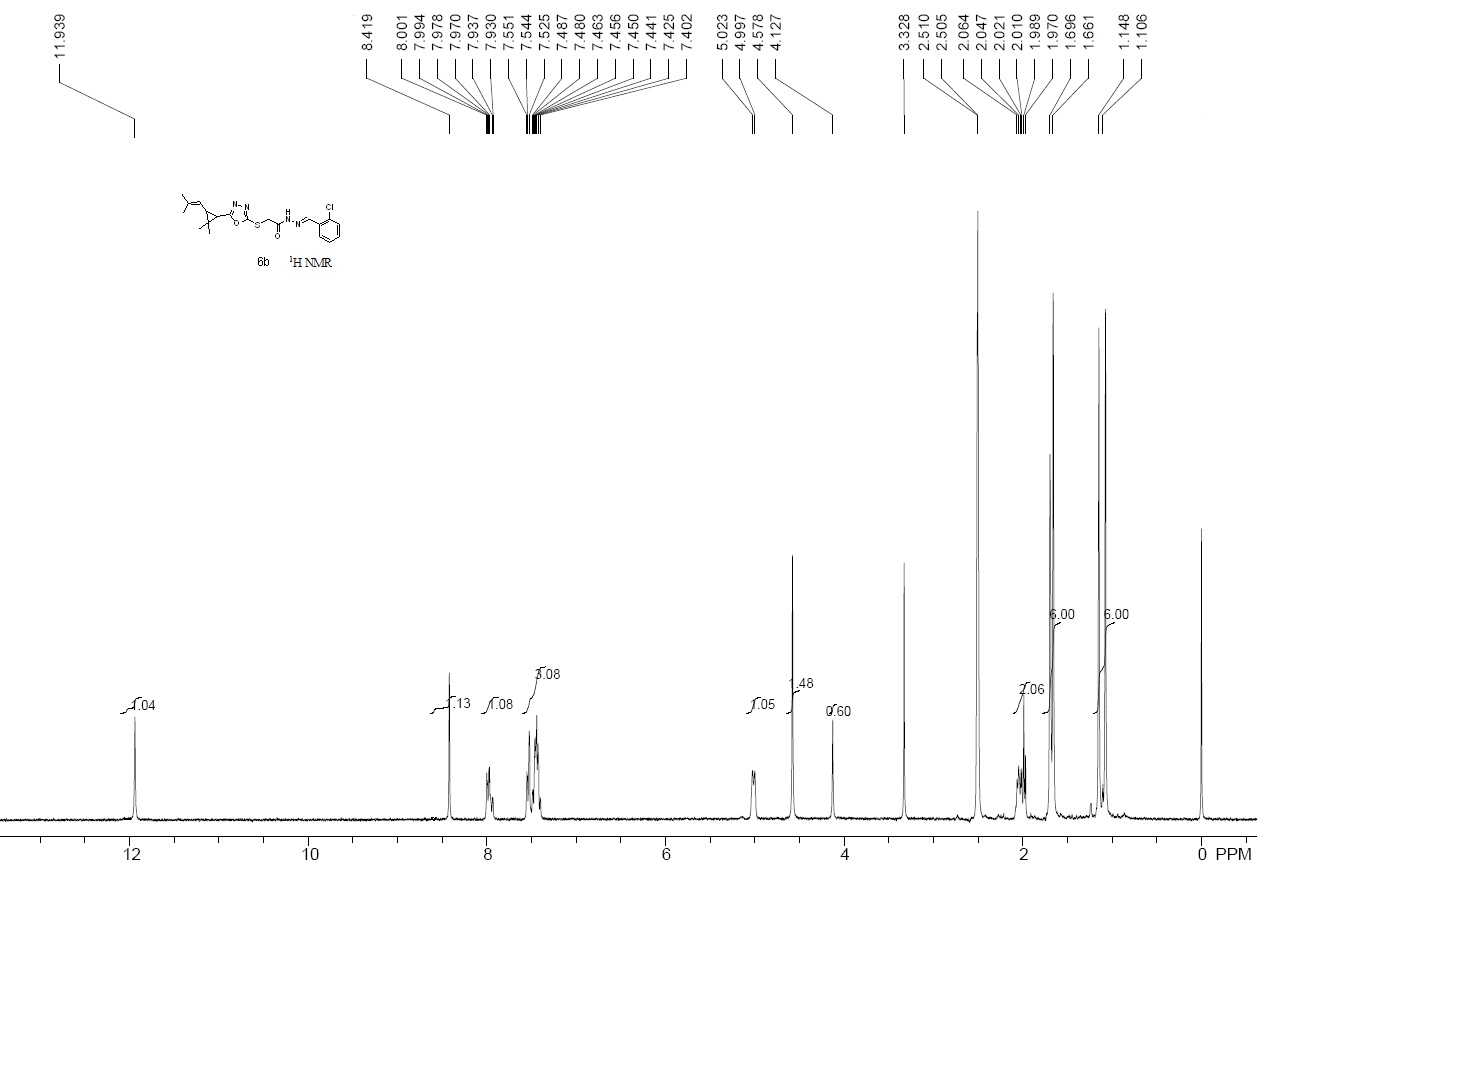


**Figure S**  5. 1H NMR of Compound 6b


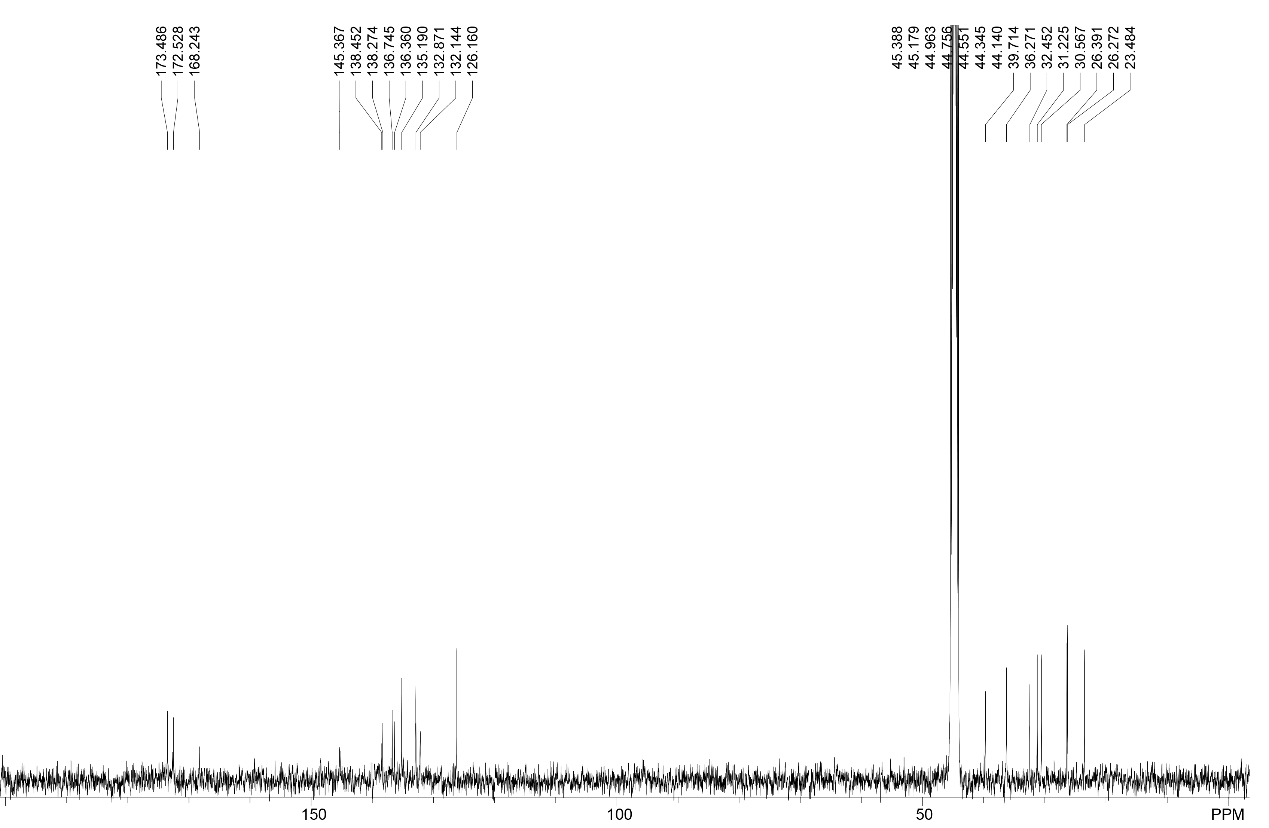


**Figure S**  6. 13C NMR of compound 6b


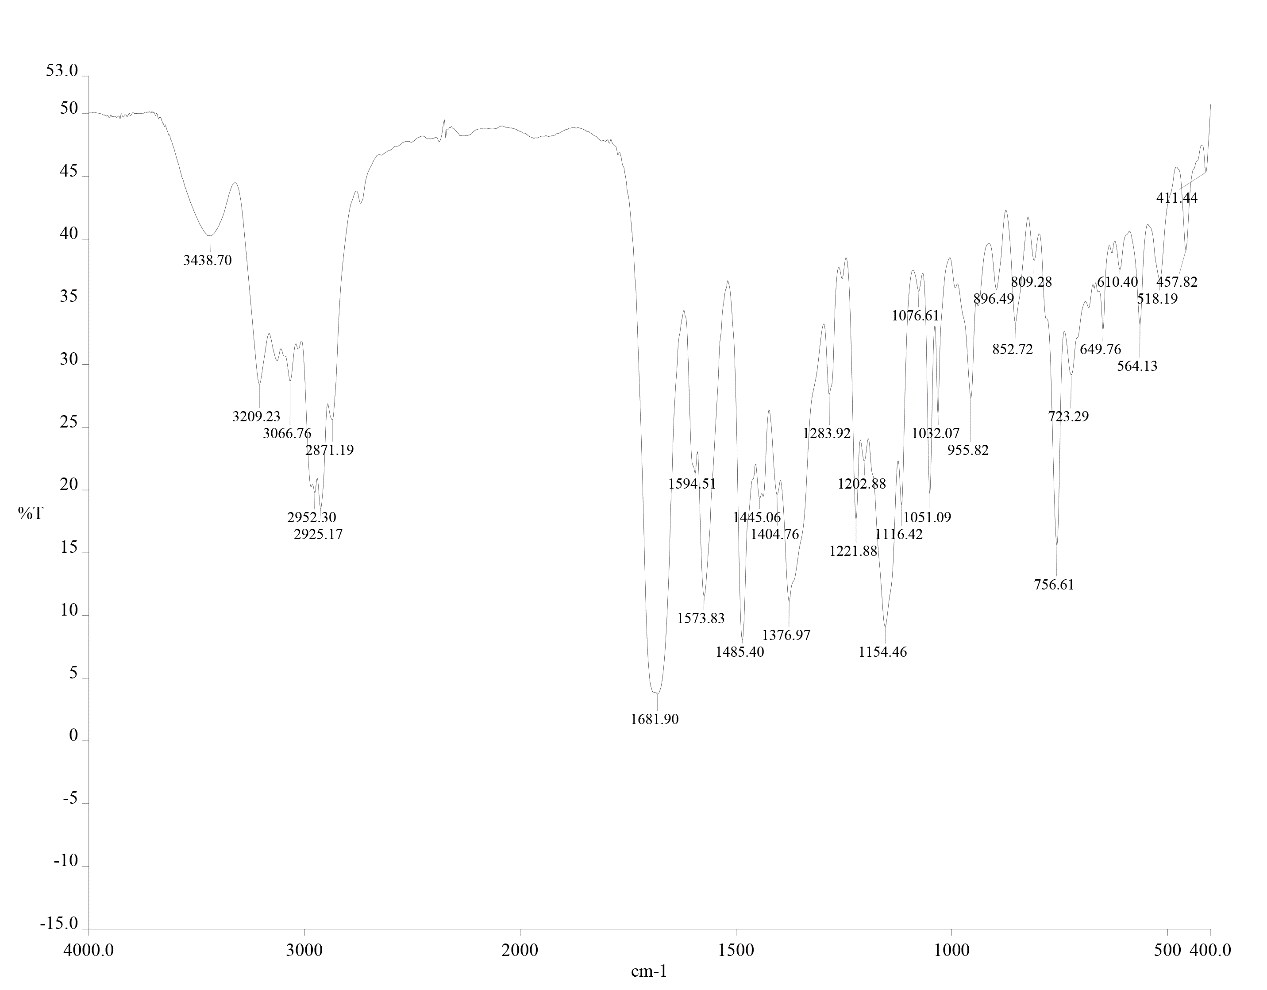


**Figure S**  7. IR of compound 6b


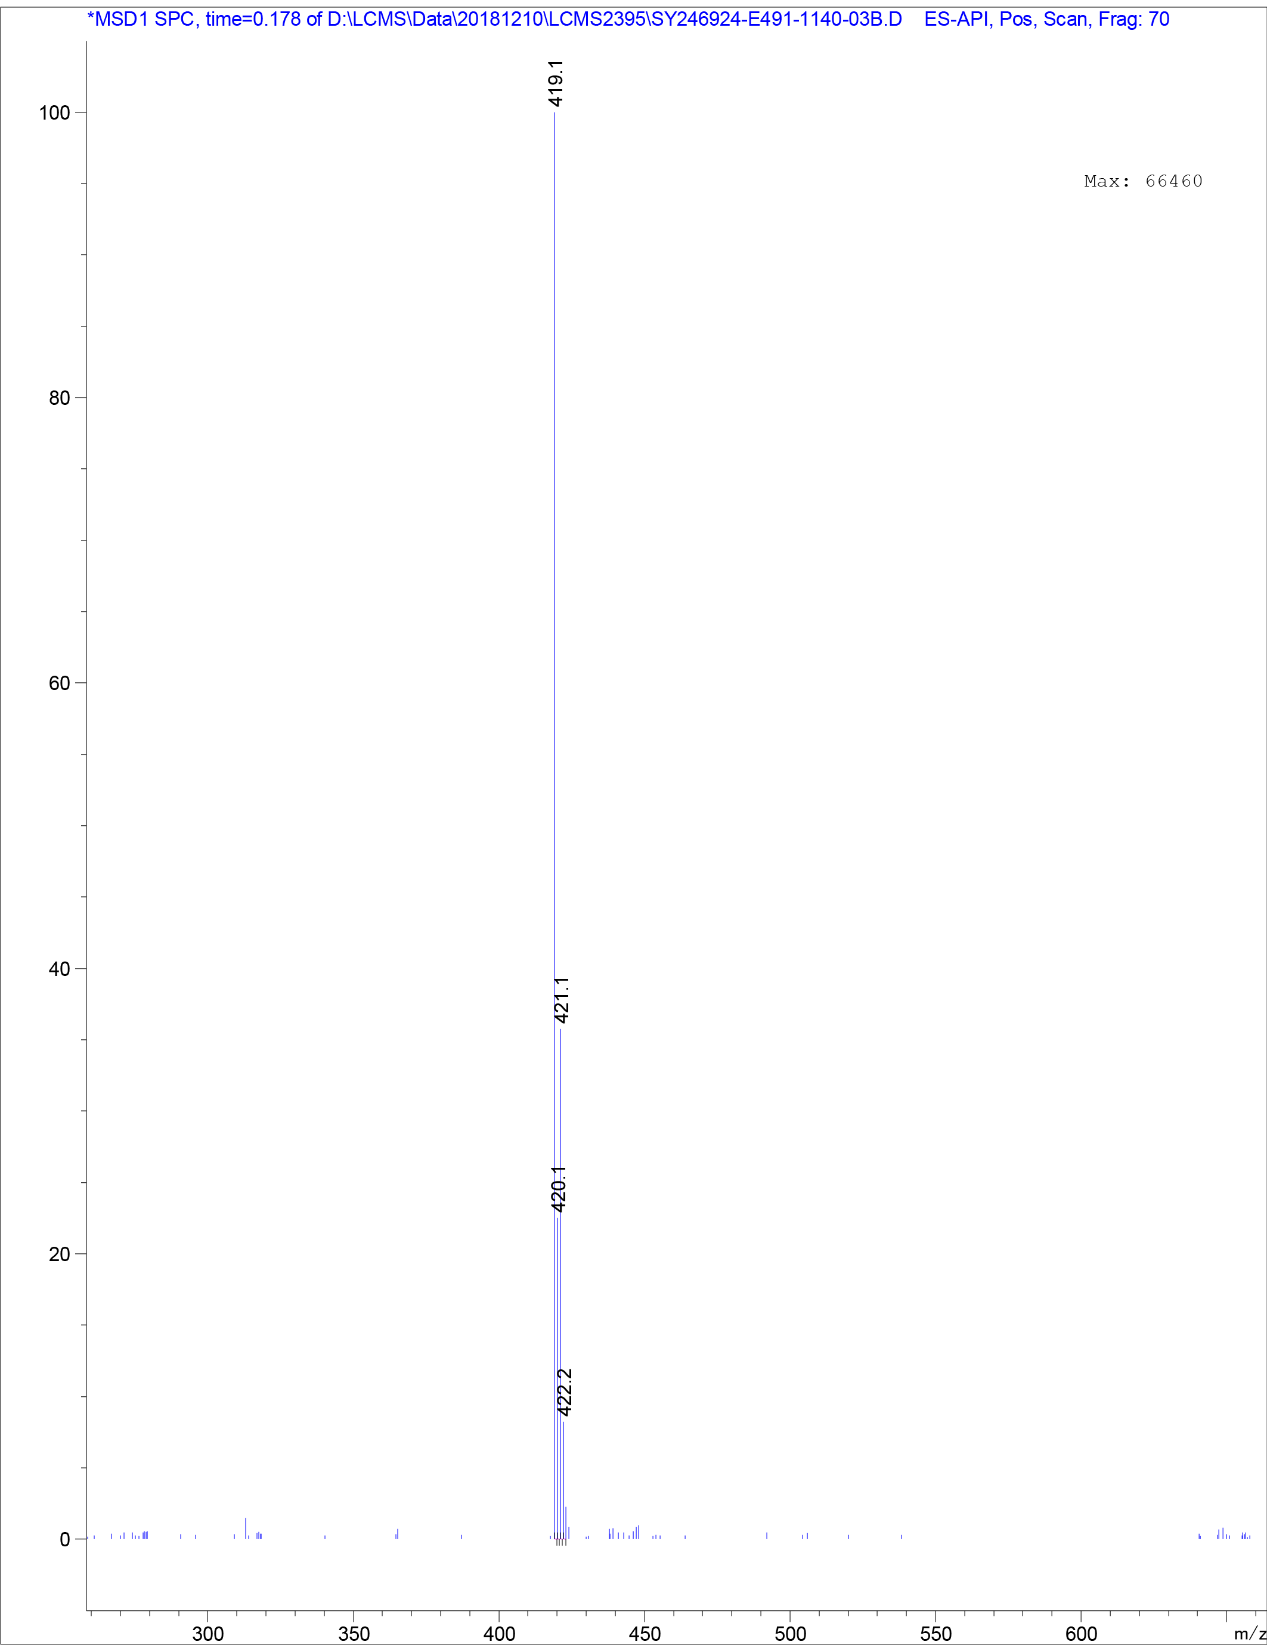


**Figure S**  8. ESI-MS of compound 6b


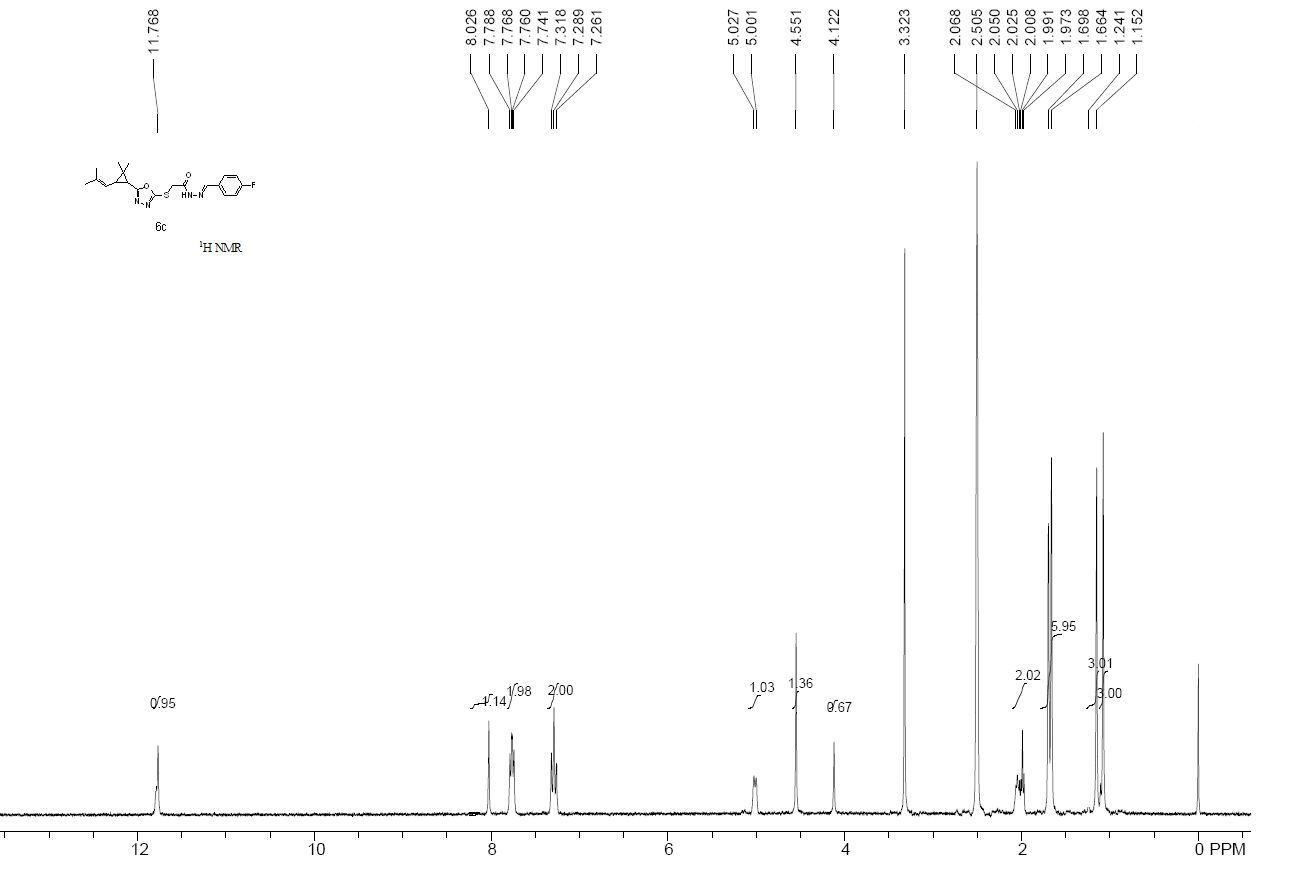


**Figure S**  9. 1H NMR of compound 6c


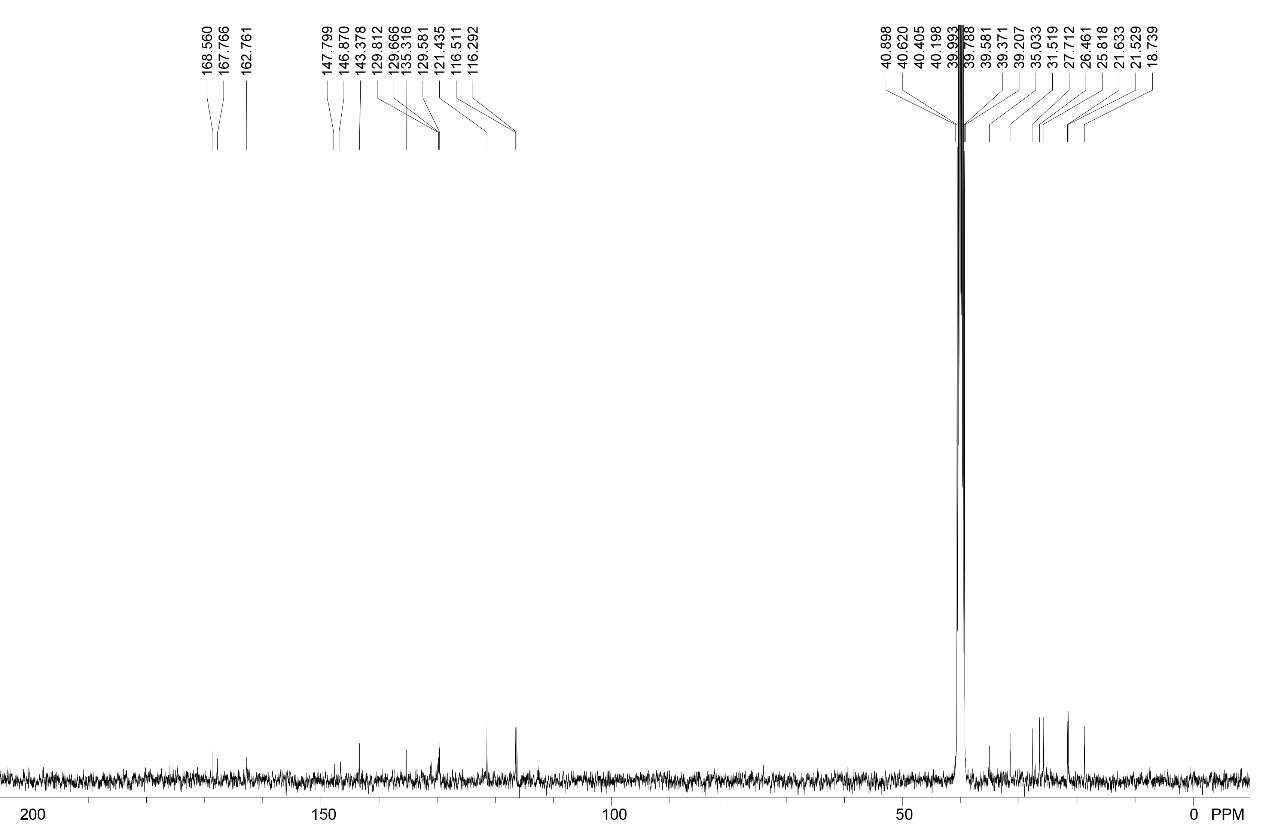


**Figure S**  10. 13C NMR of compound 6c


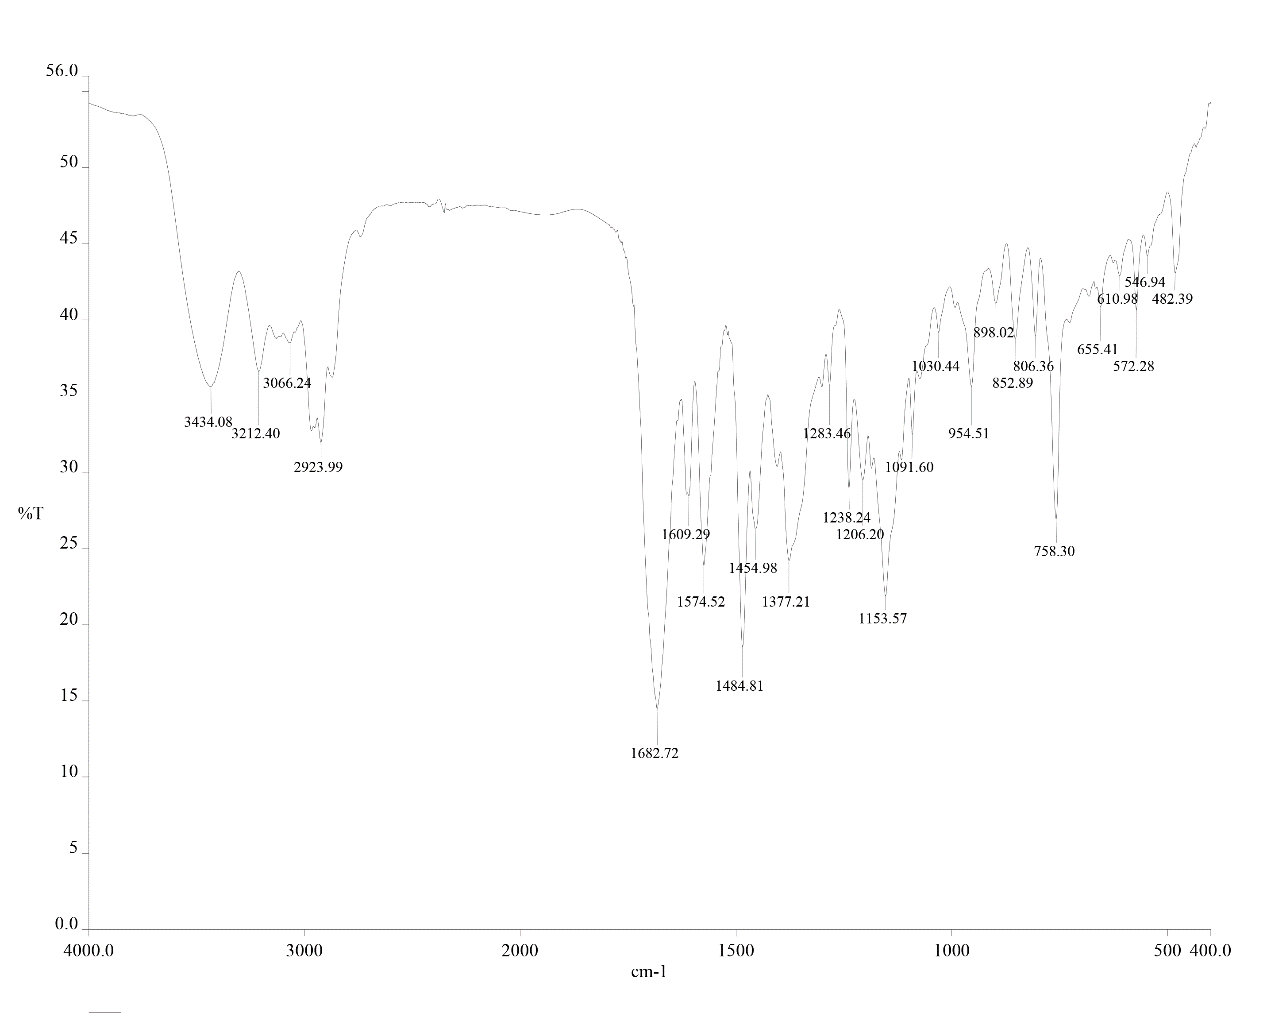


**Figure S**  11. IR of compound 6c


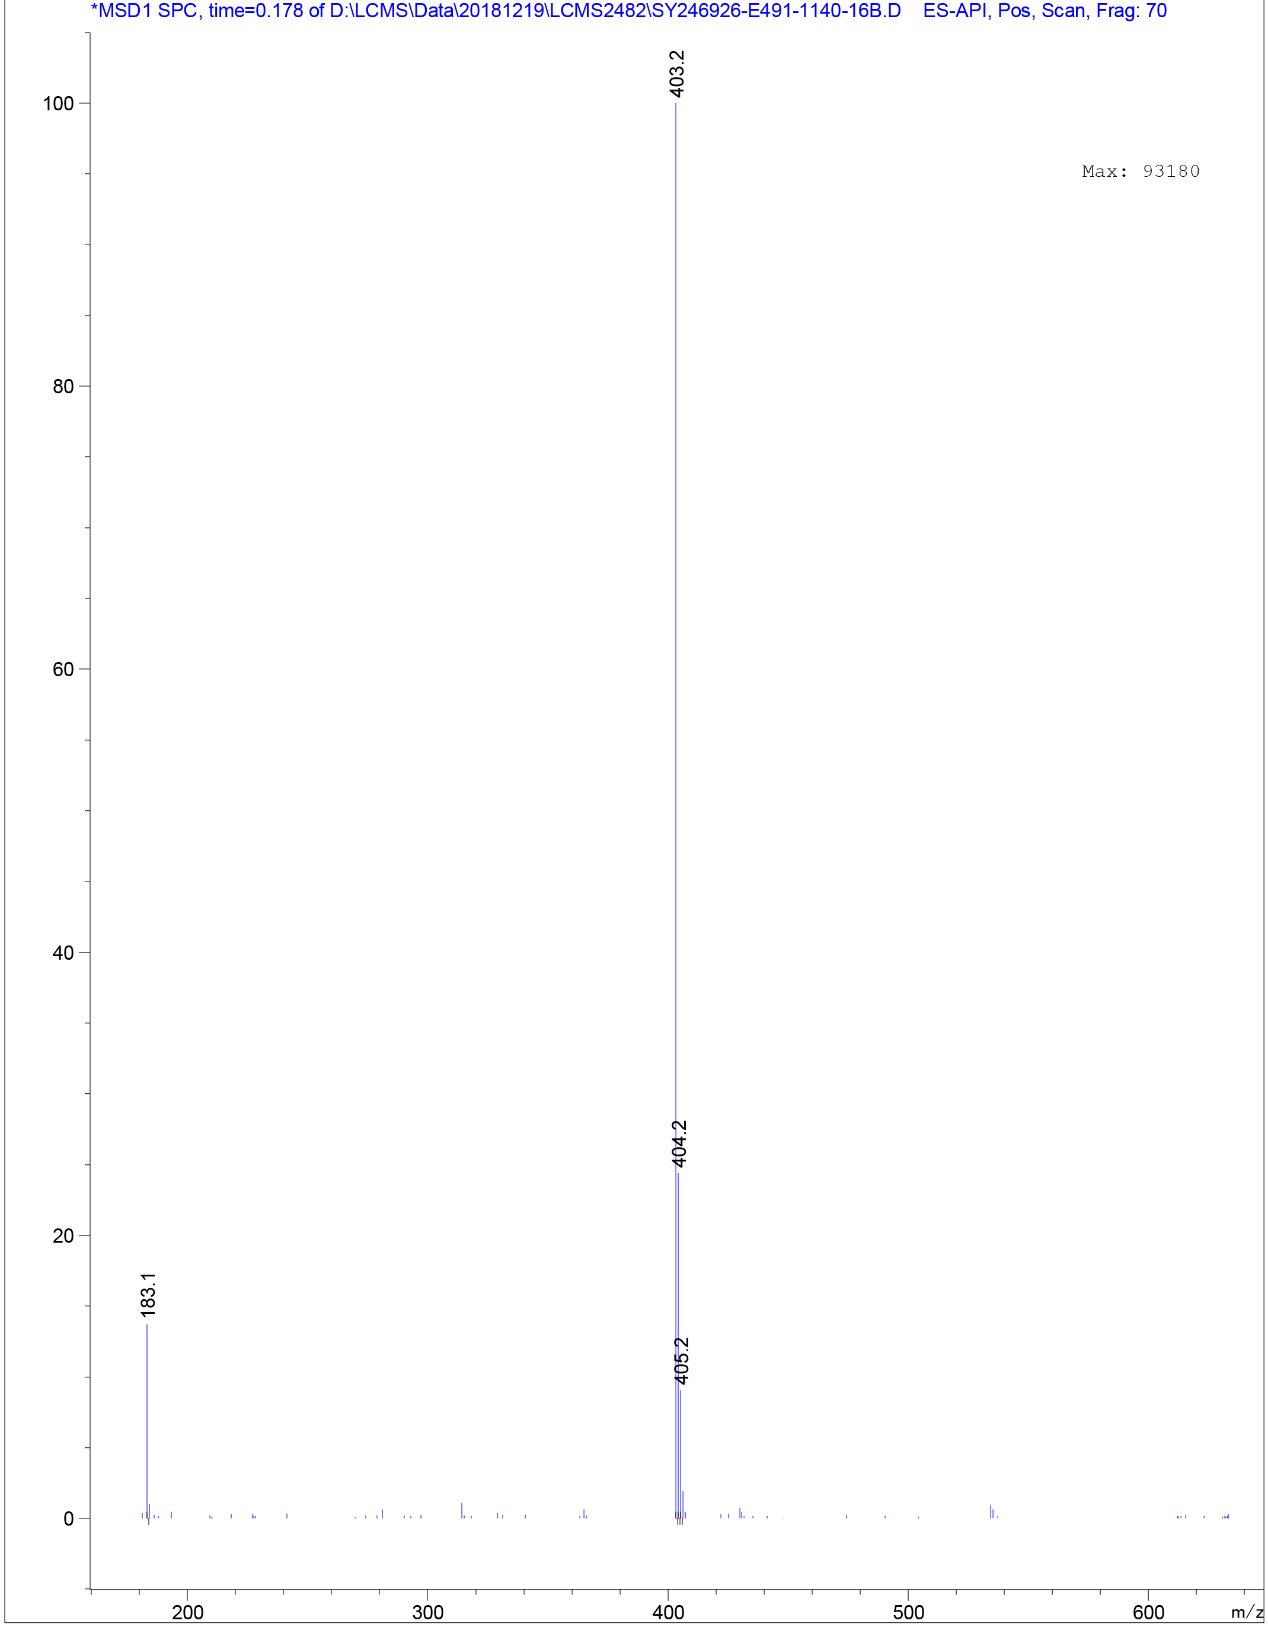


**Figure S**  12. ESI-MS of compound 6c


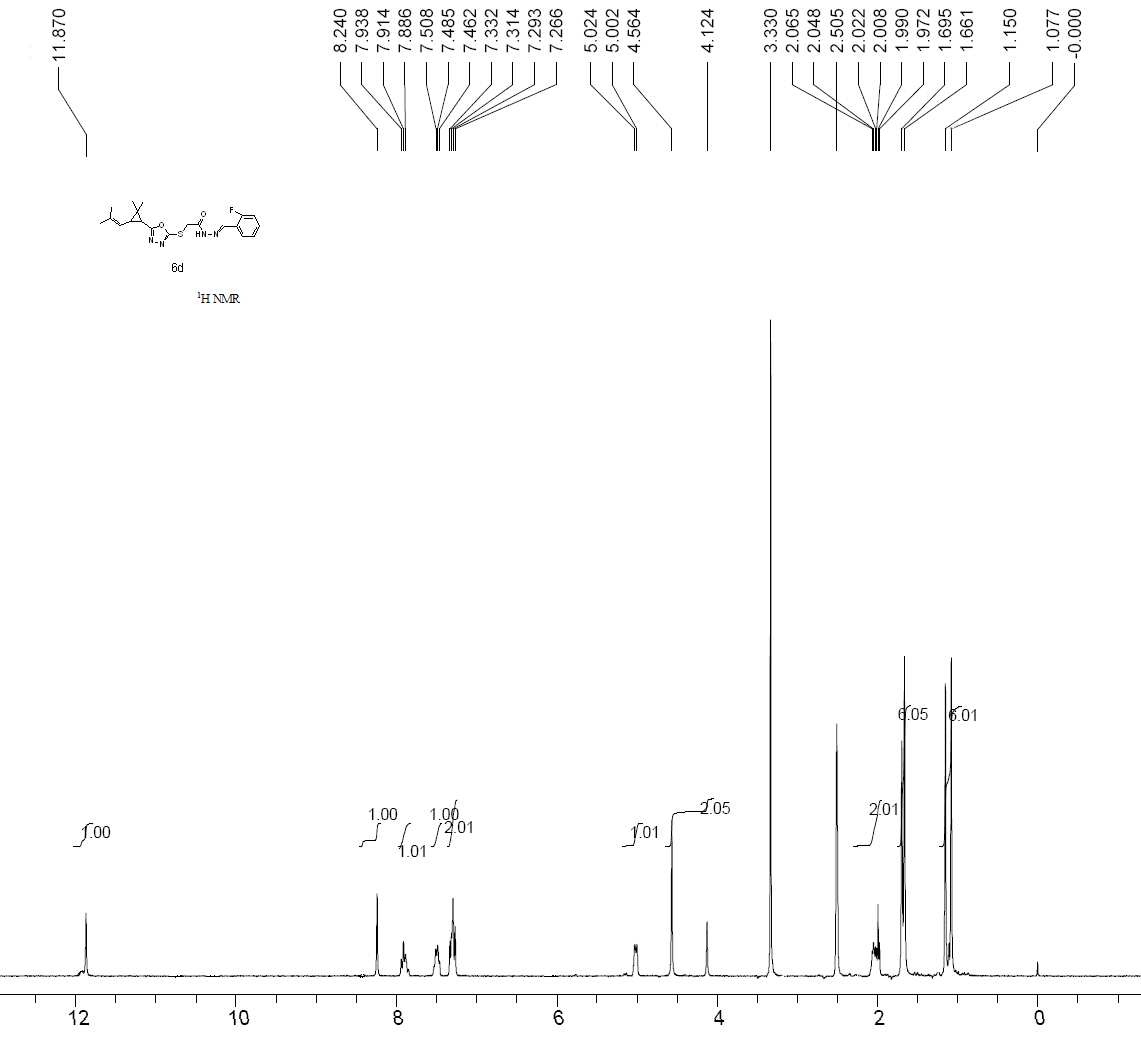


**Figure S**  13. 1H NMR of compound 6d


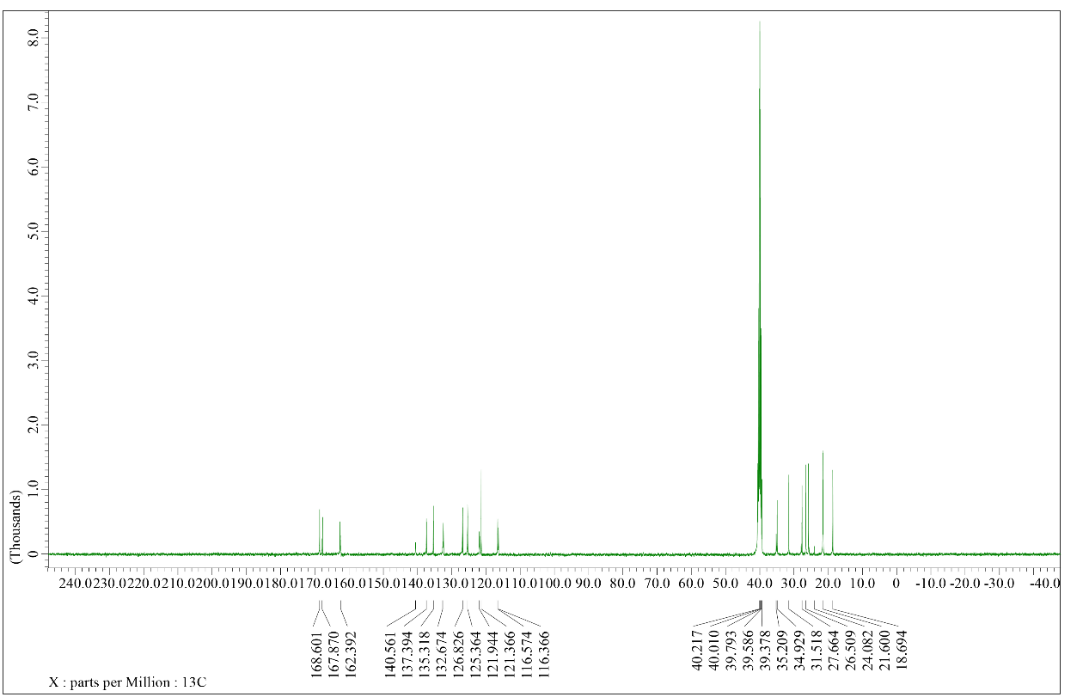


**Figure S**  14. 13C NMR of compound 6d


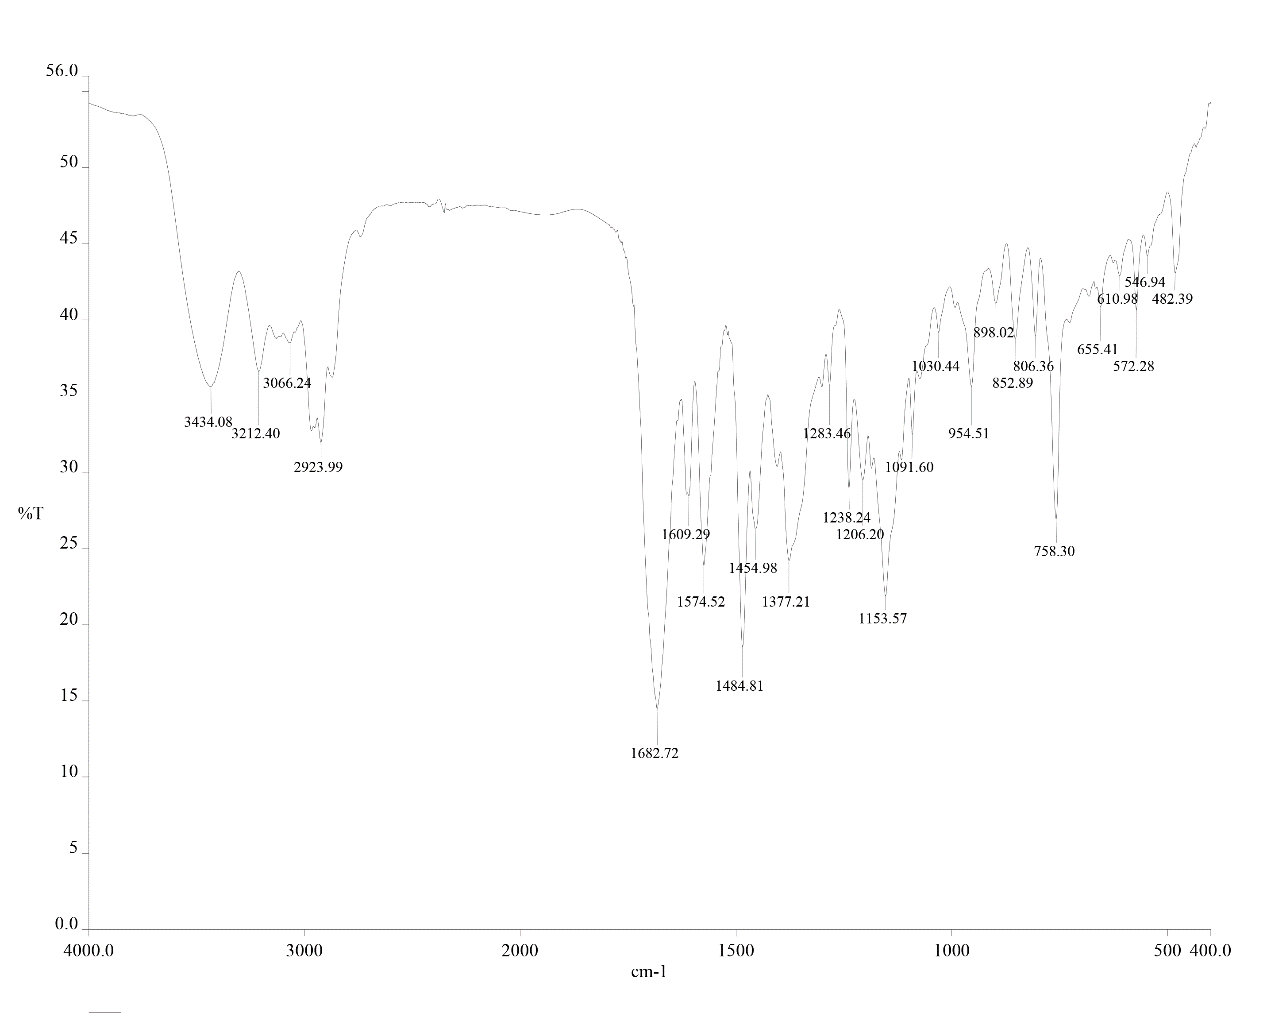


**Figure S**  15. IR of compound 6d


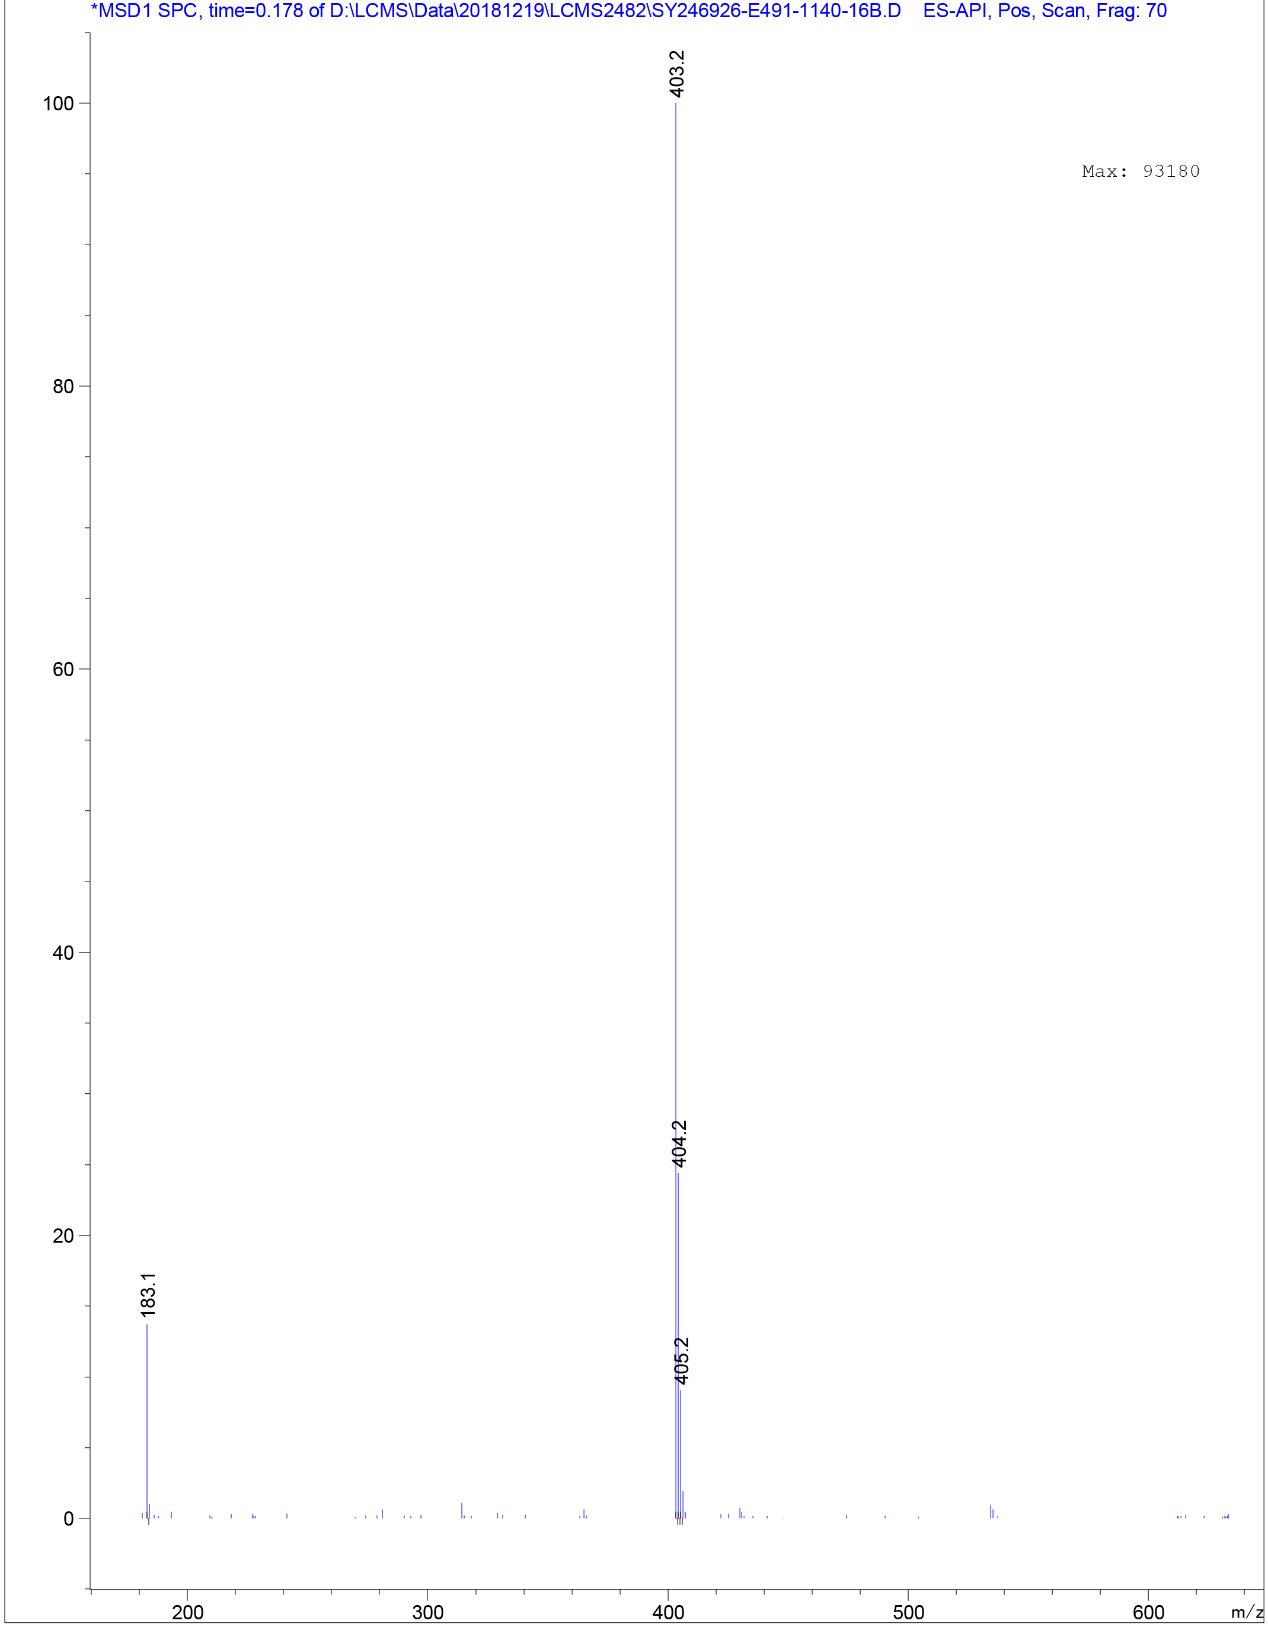


**Figure S**  16. ESI-MS of compound 6d


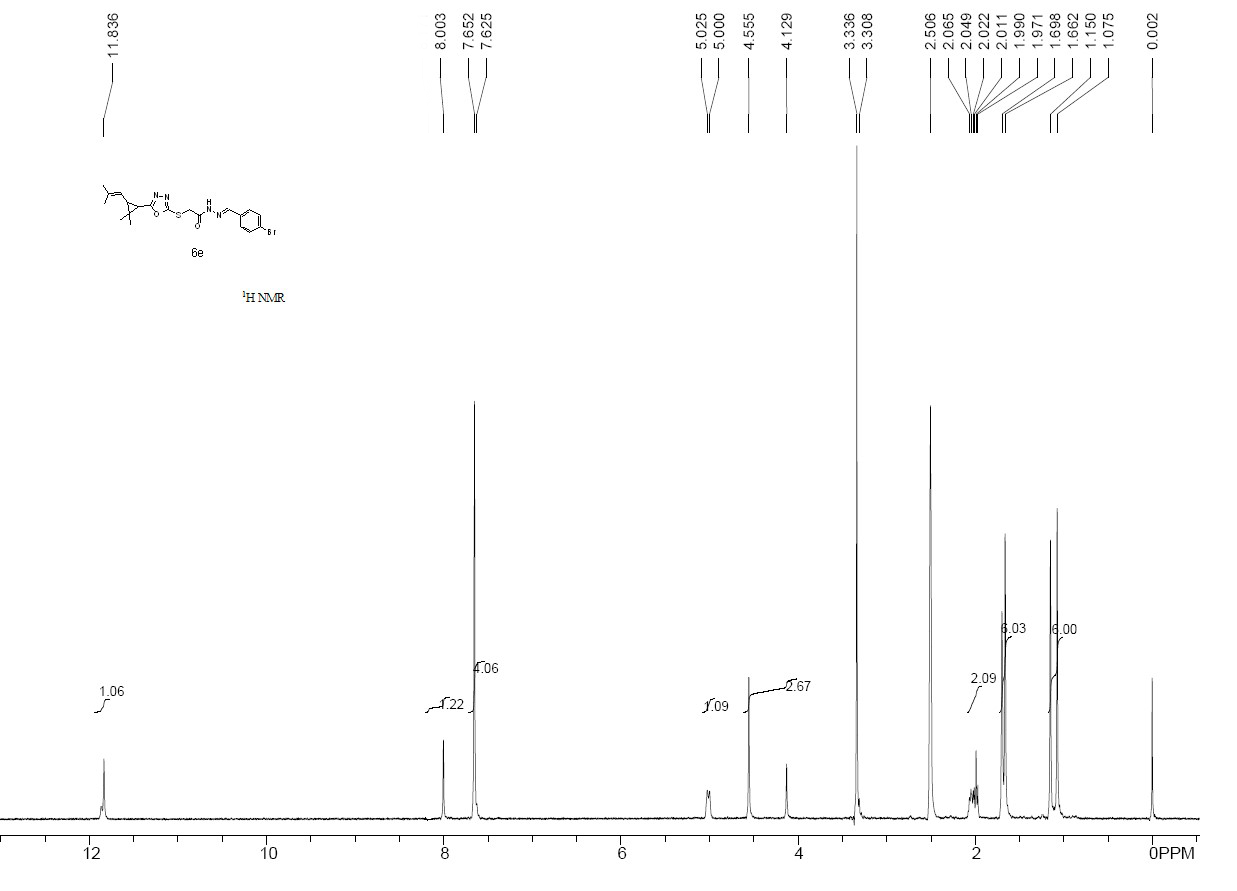


**Figure S**  17. 1H NMR of compound 6e


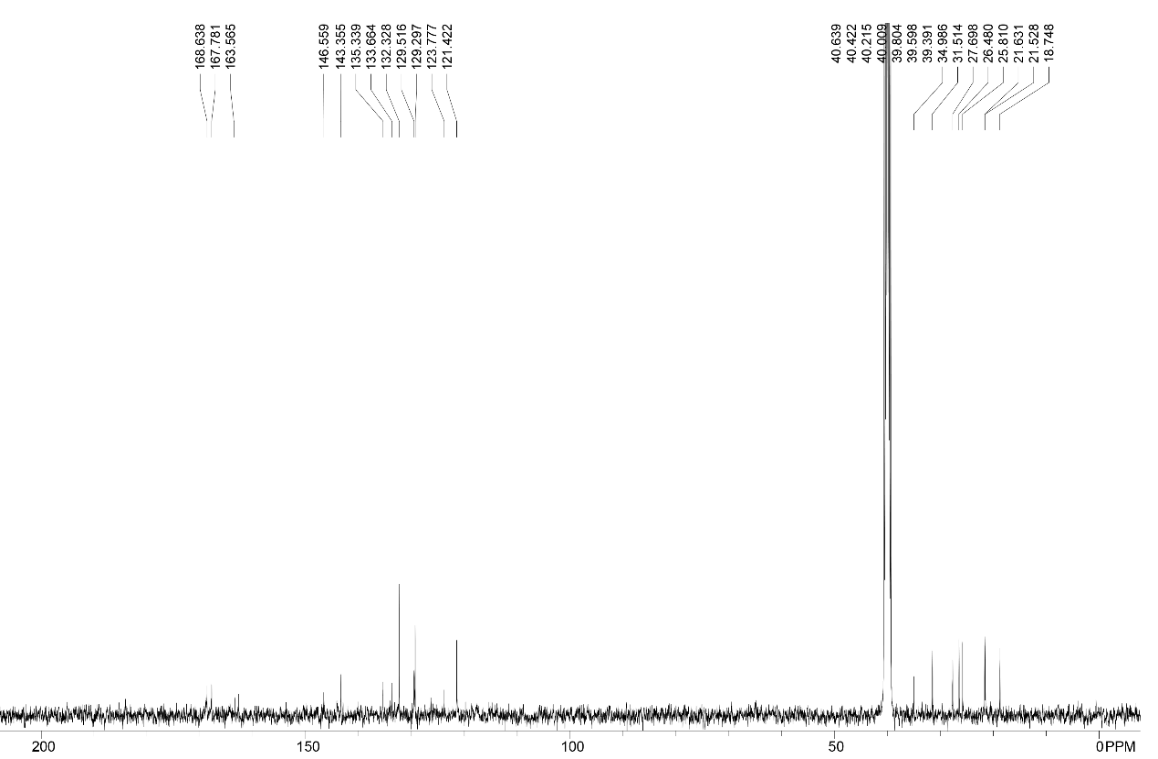


**Figure S**  18. 13C NMR of compound 6e


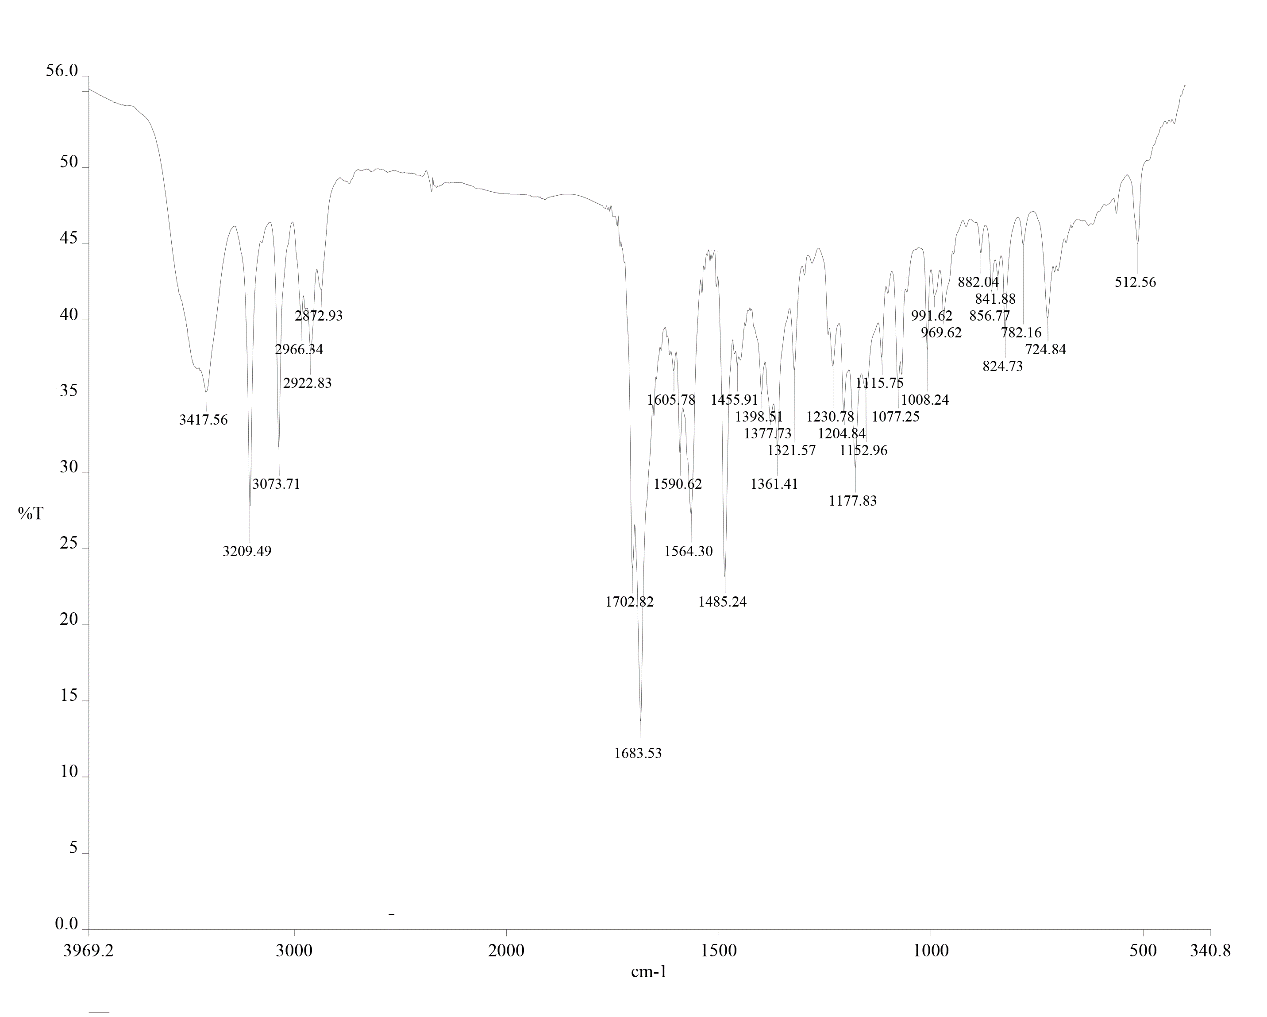


**Figure S**  19. IR of compound 6e


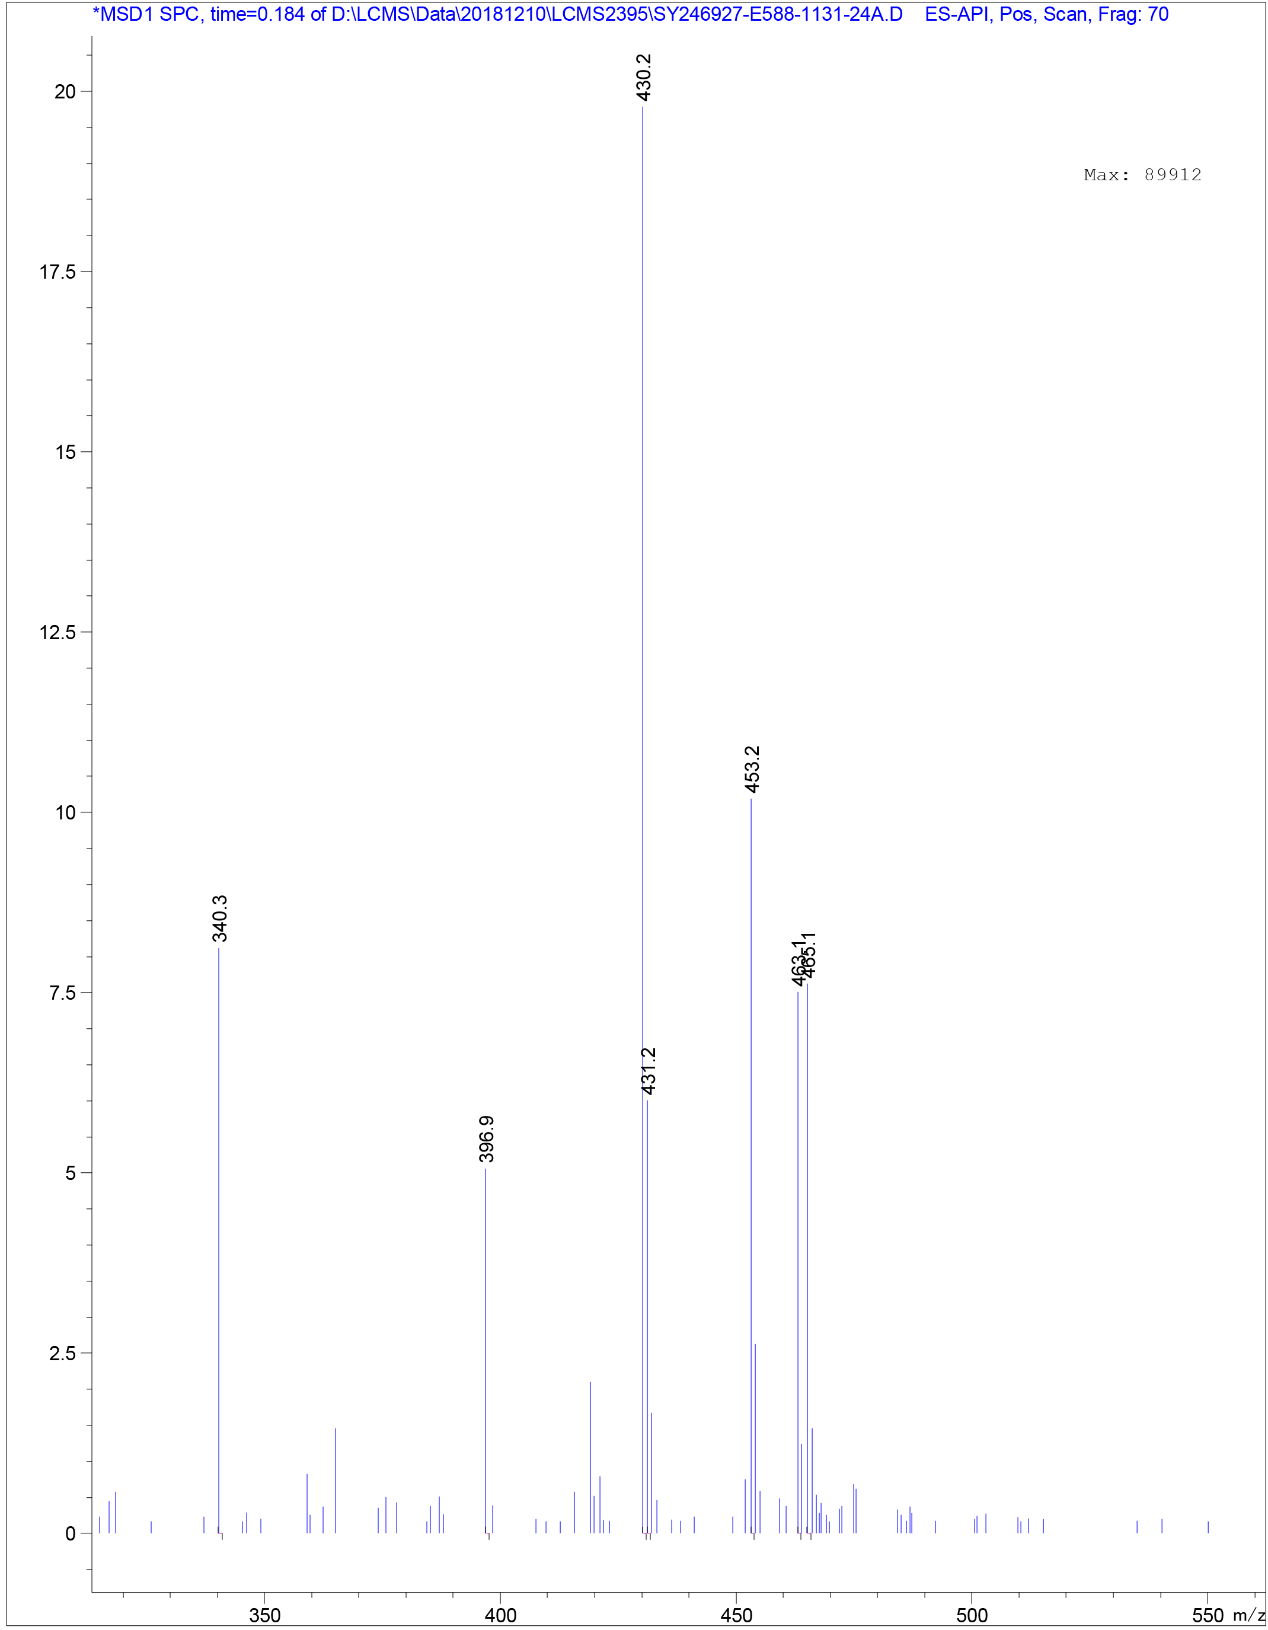


**Figure S**  20. ESI-MS of compound 6e


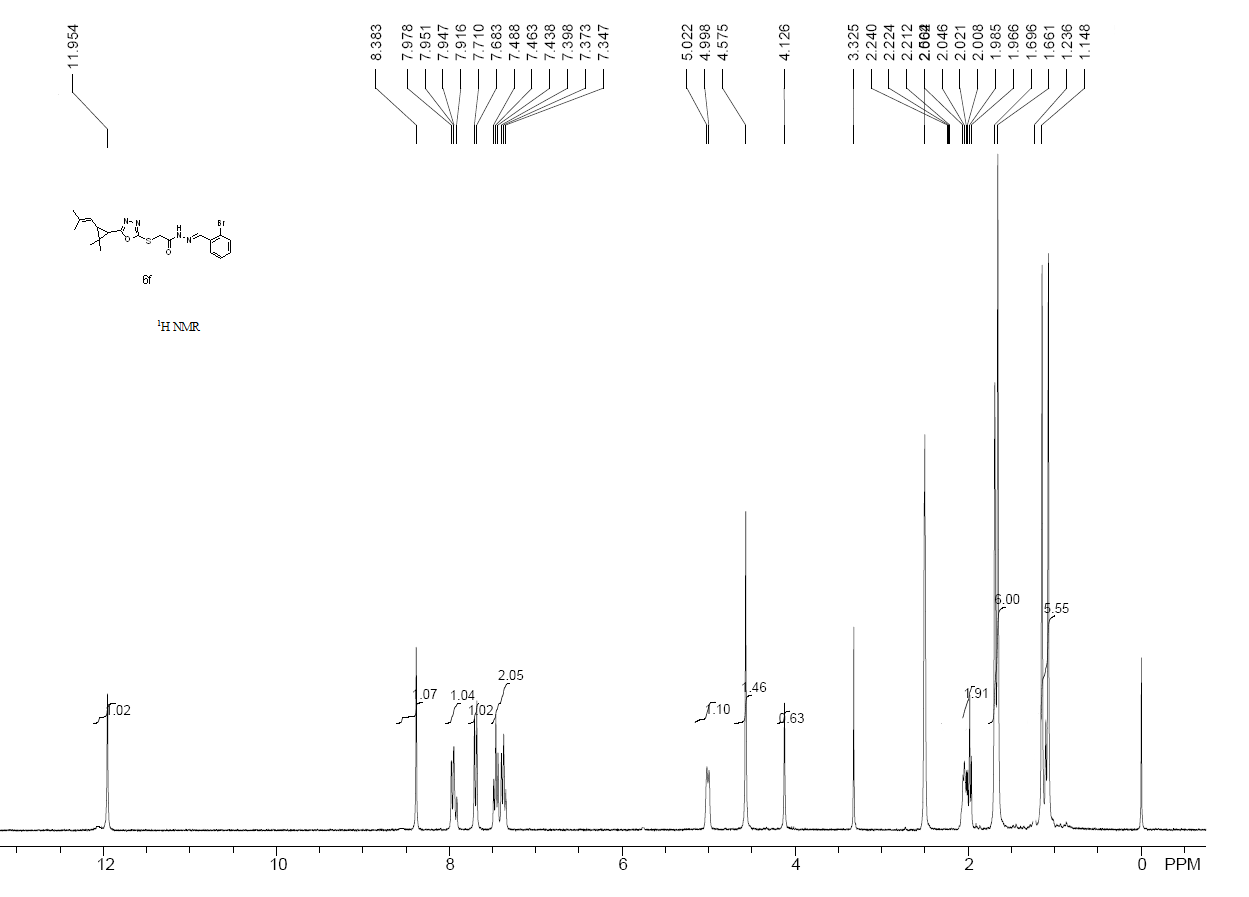


**Figure S**  21. 1H NMR of compound 6f


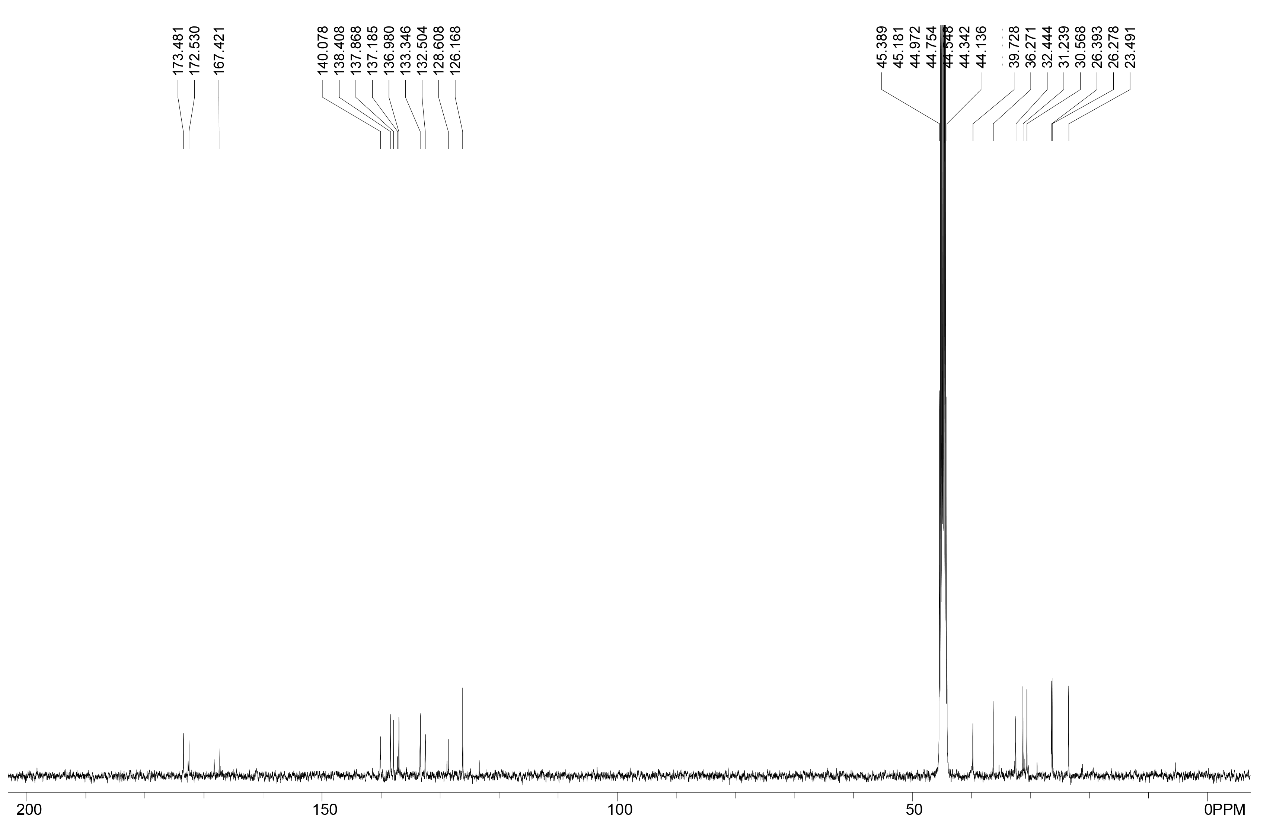


**Figure S**  22. 13C NMR of compound 6f


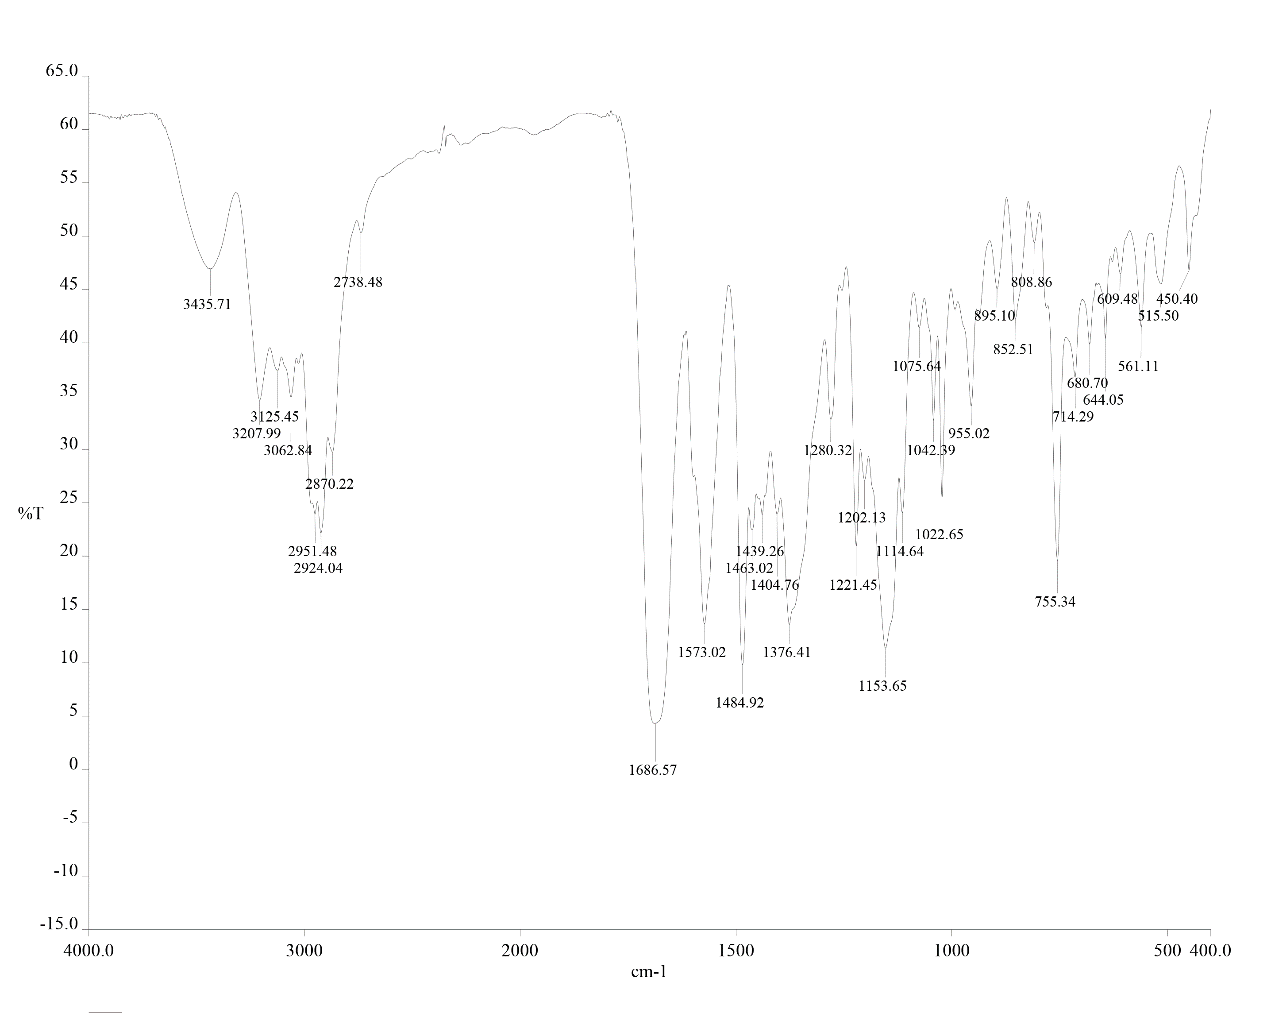


**Figure S**  23. IR of compound 6f


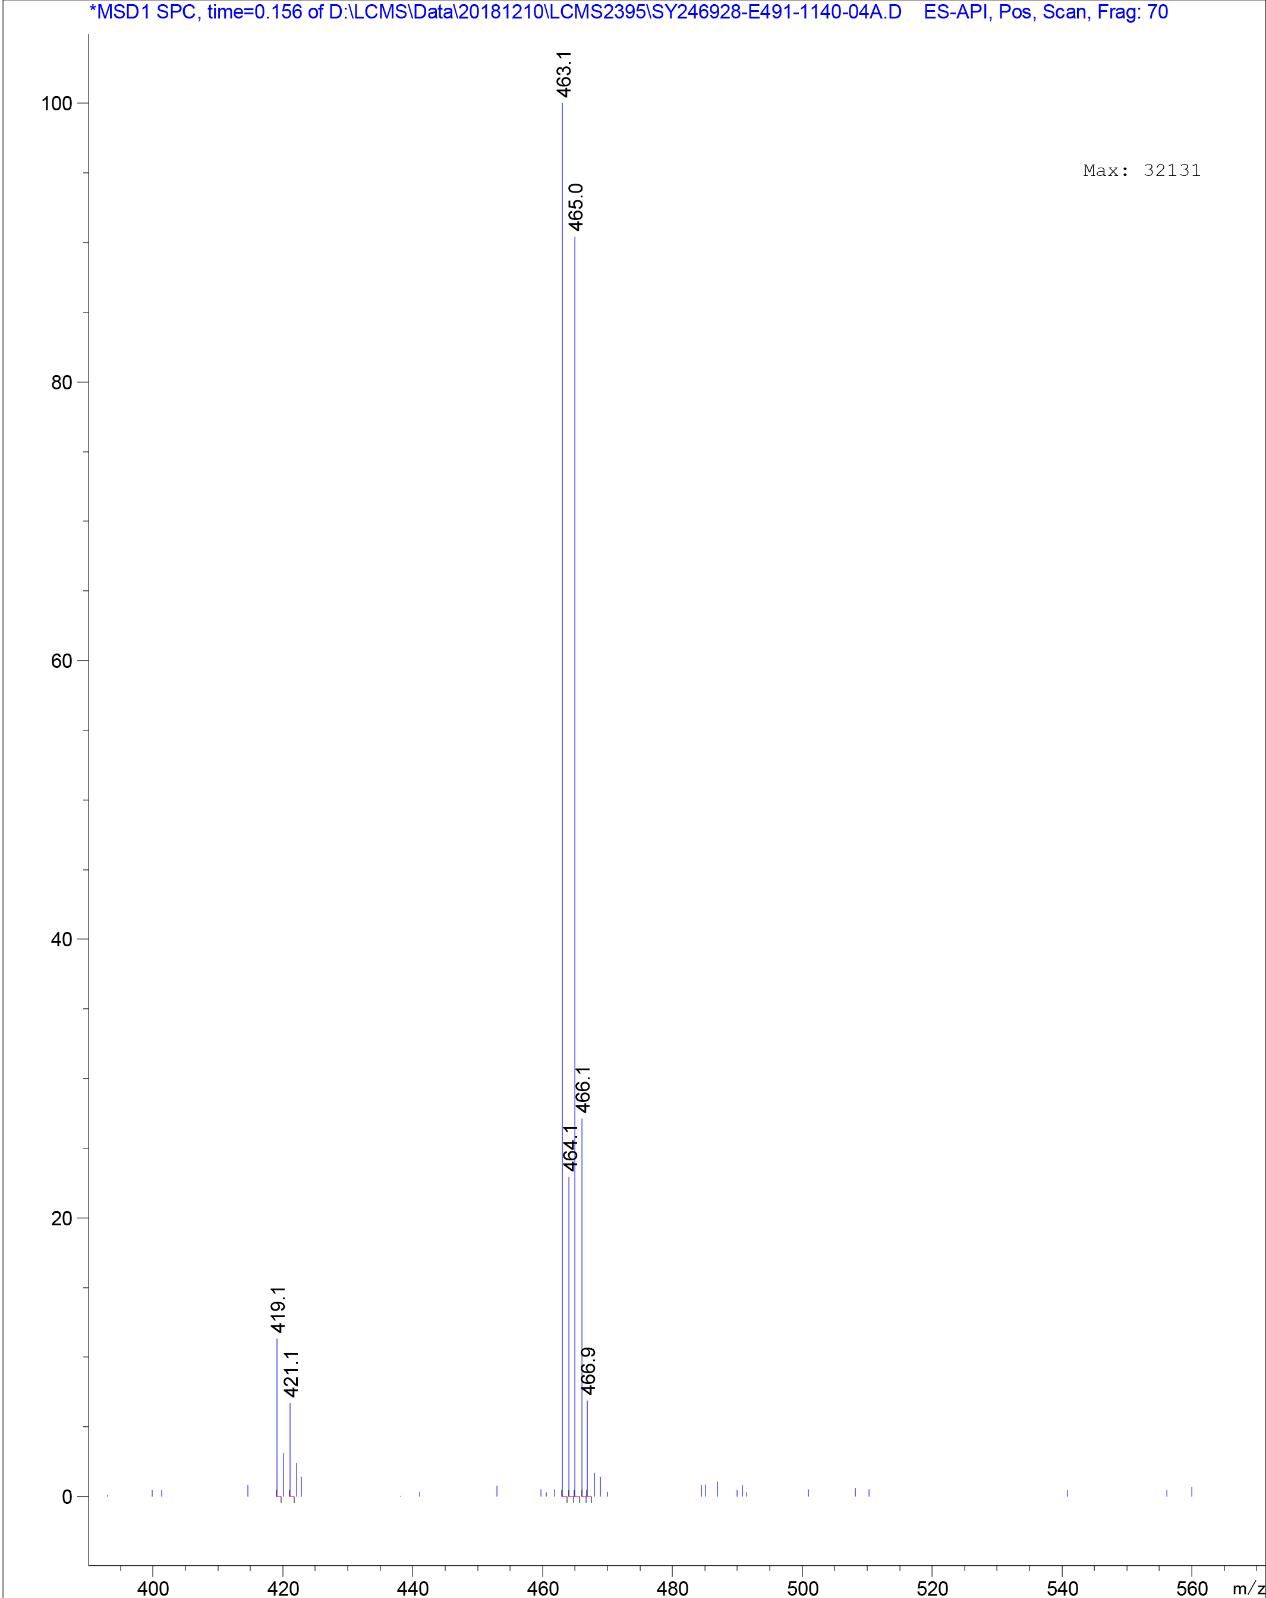


**Figure S**  24. ESI-MS of compound 6f


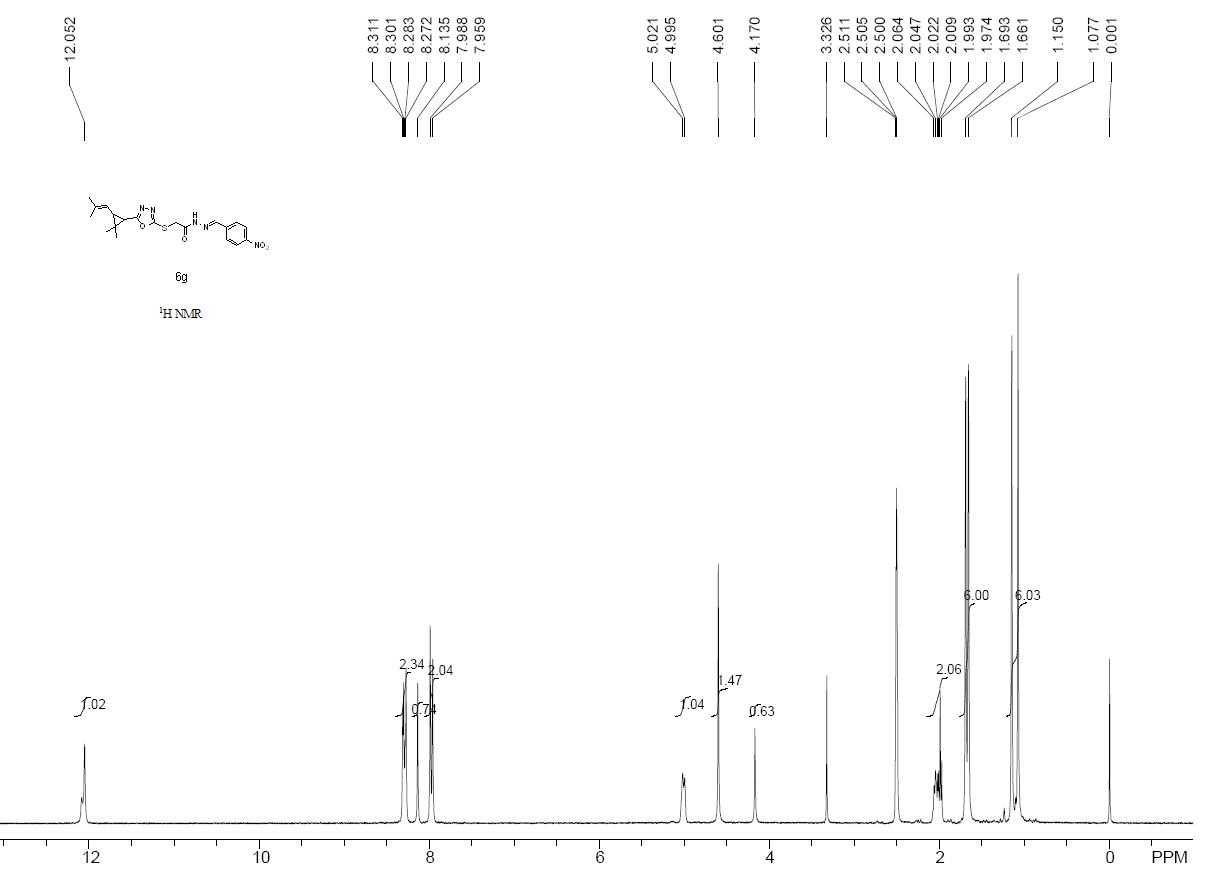


**Figure S**  25. 1H NMR of compound 6g


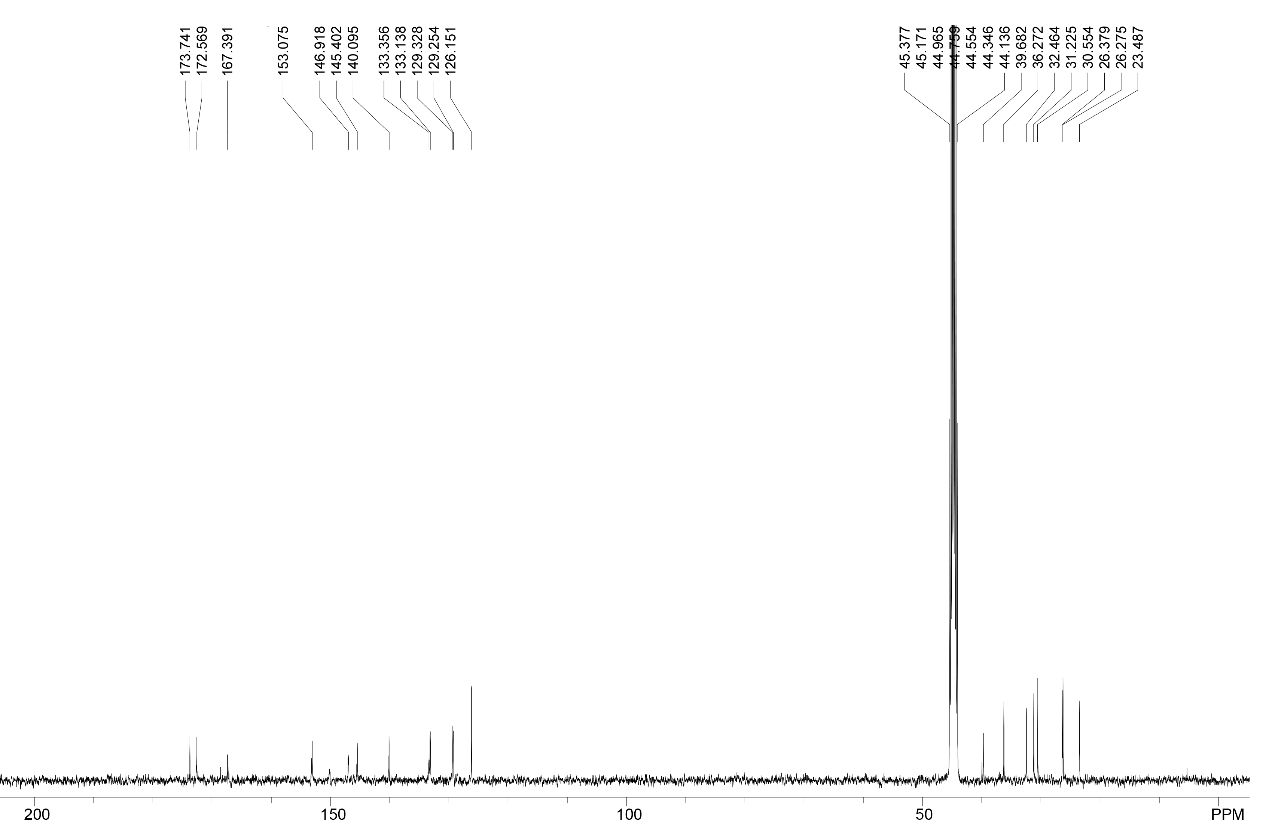


**Figure S**  26. 13C NMR of compound 6g


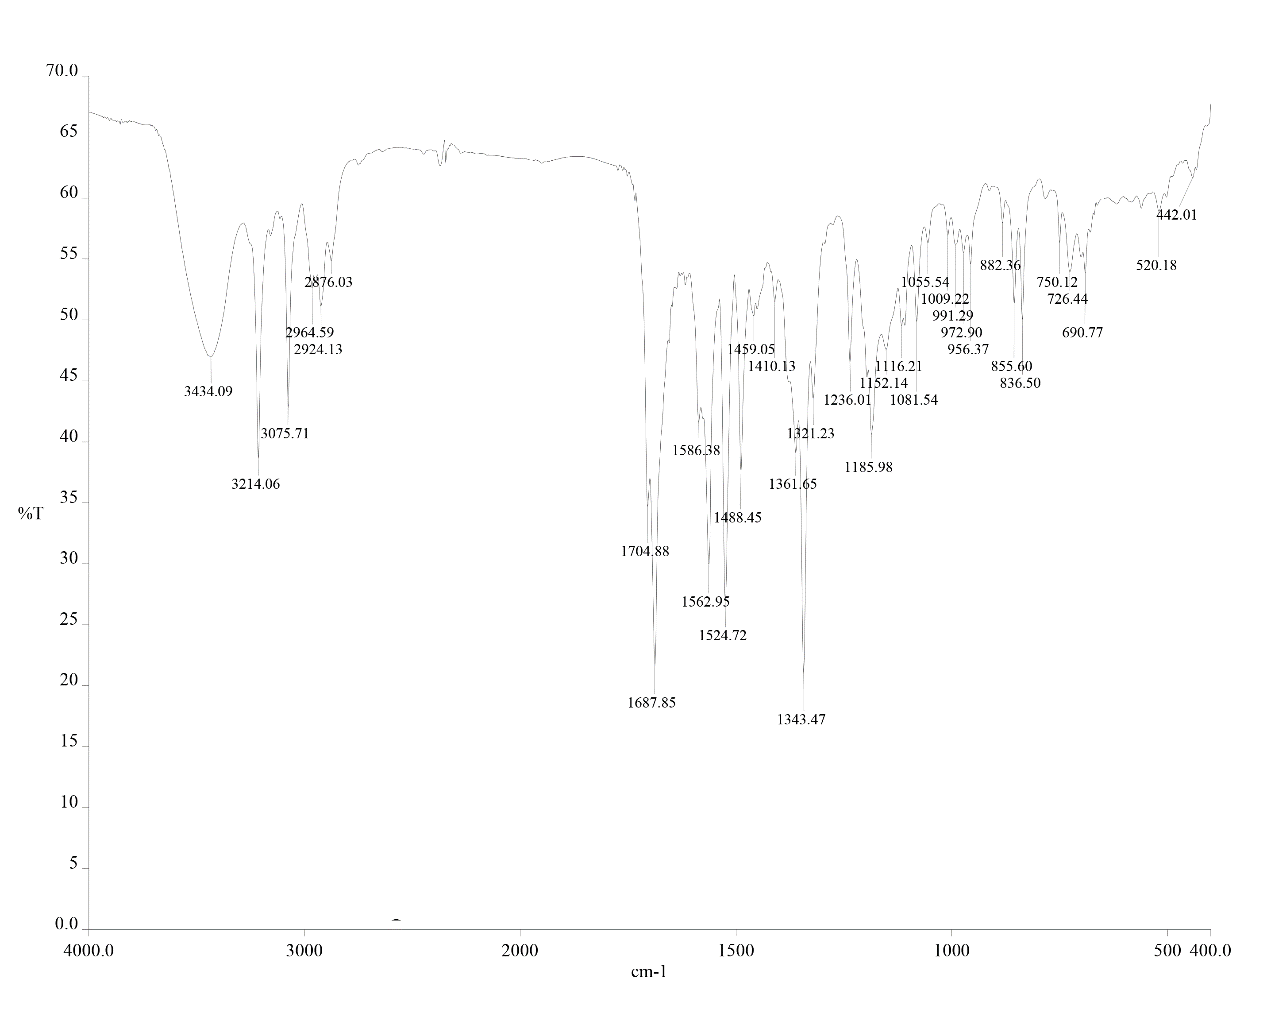


**Figure S**  27. IR of compound 6g

\
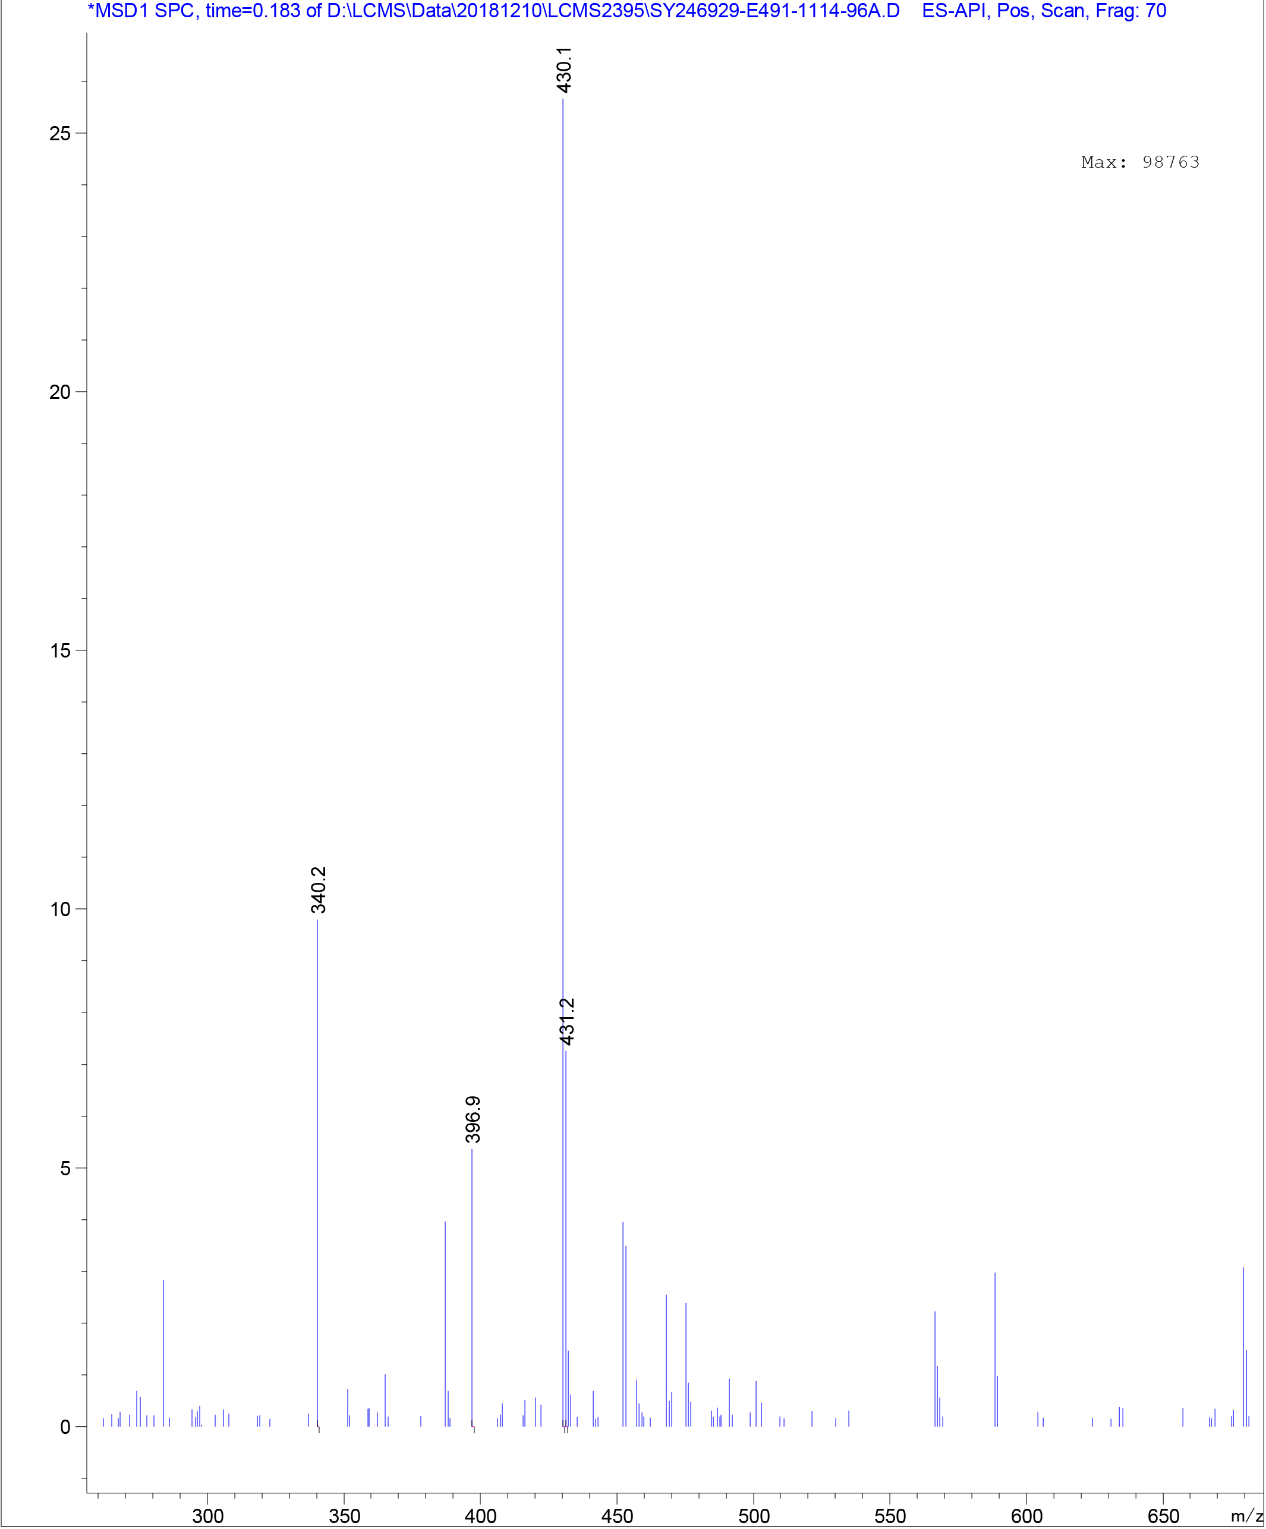


**Figure S**  28. ESI-MS of compound 6g


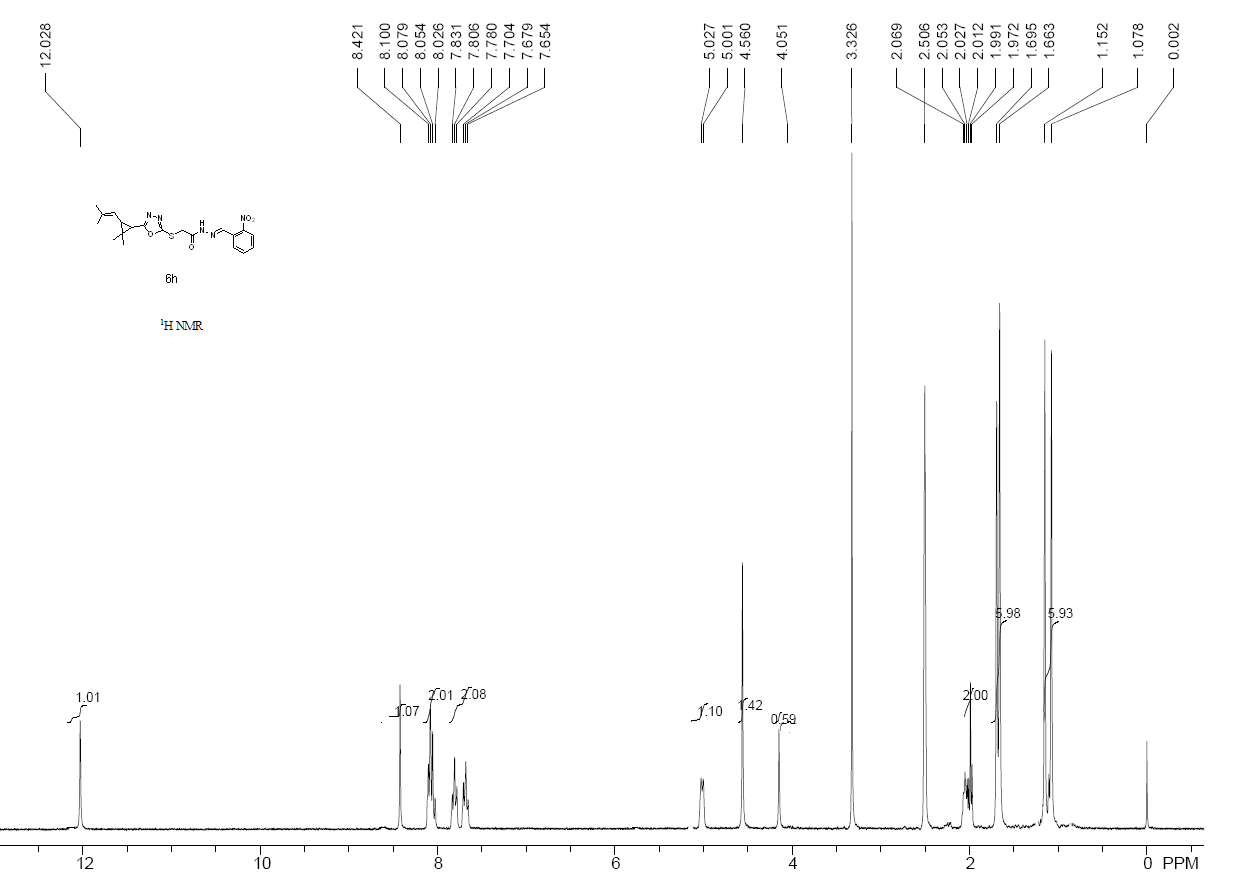


**Figure S**  29. 1H NMR of compound 6h


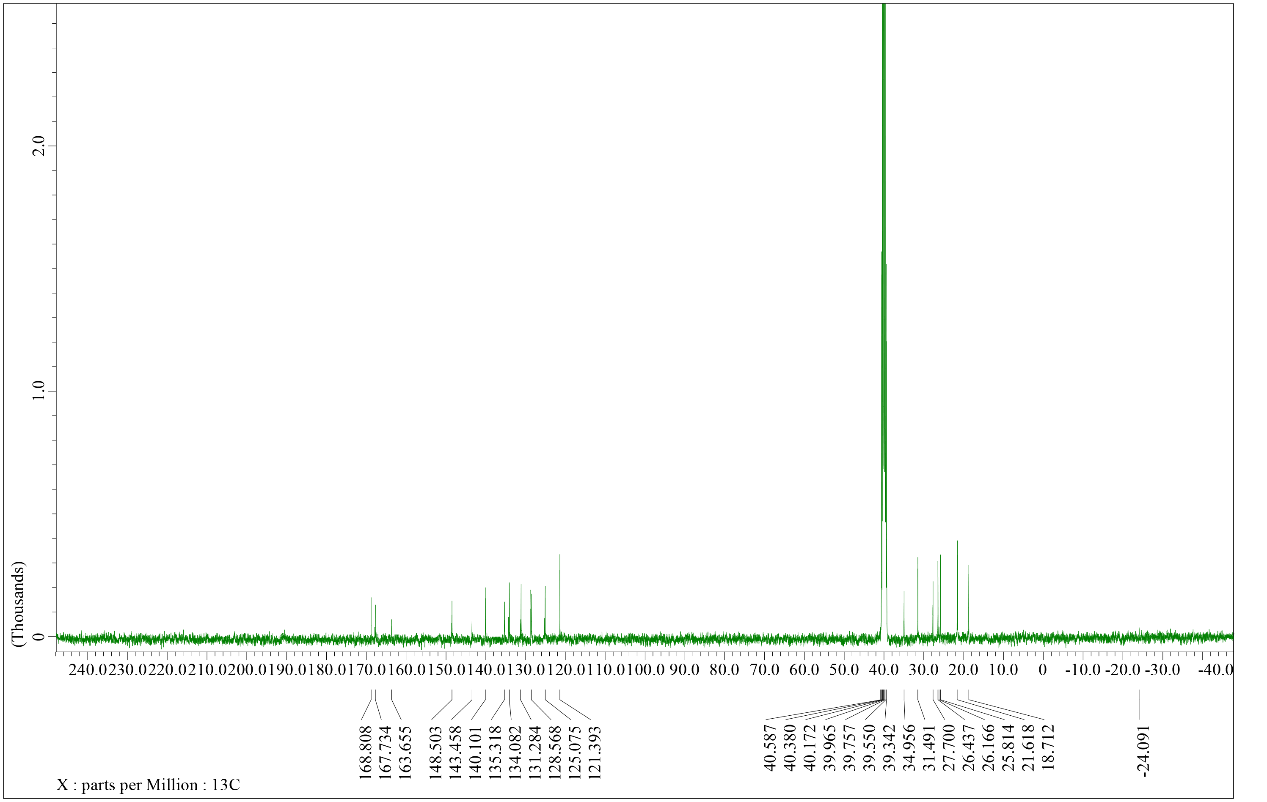


**Figure S**  30. 13C NMR of compound 6h


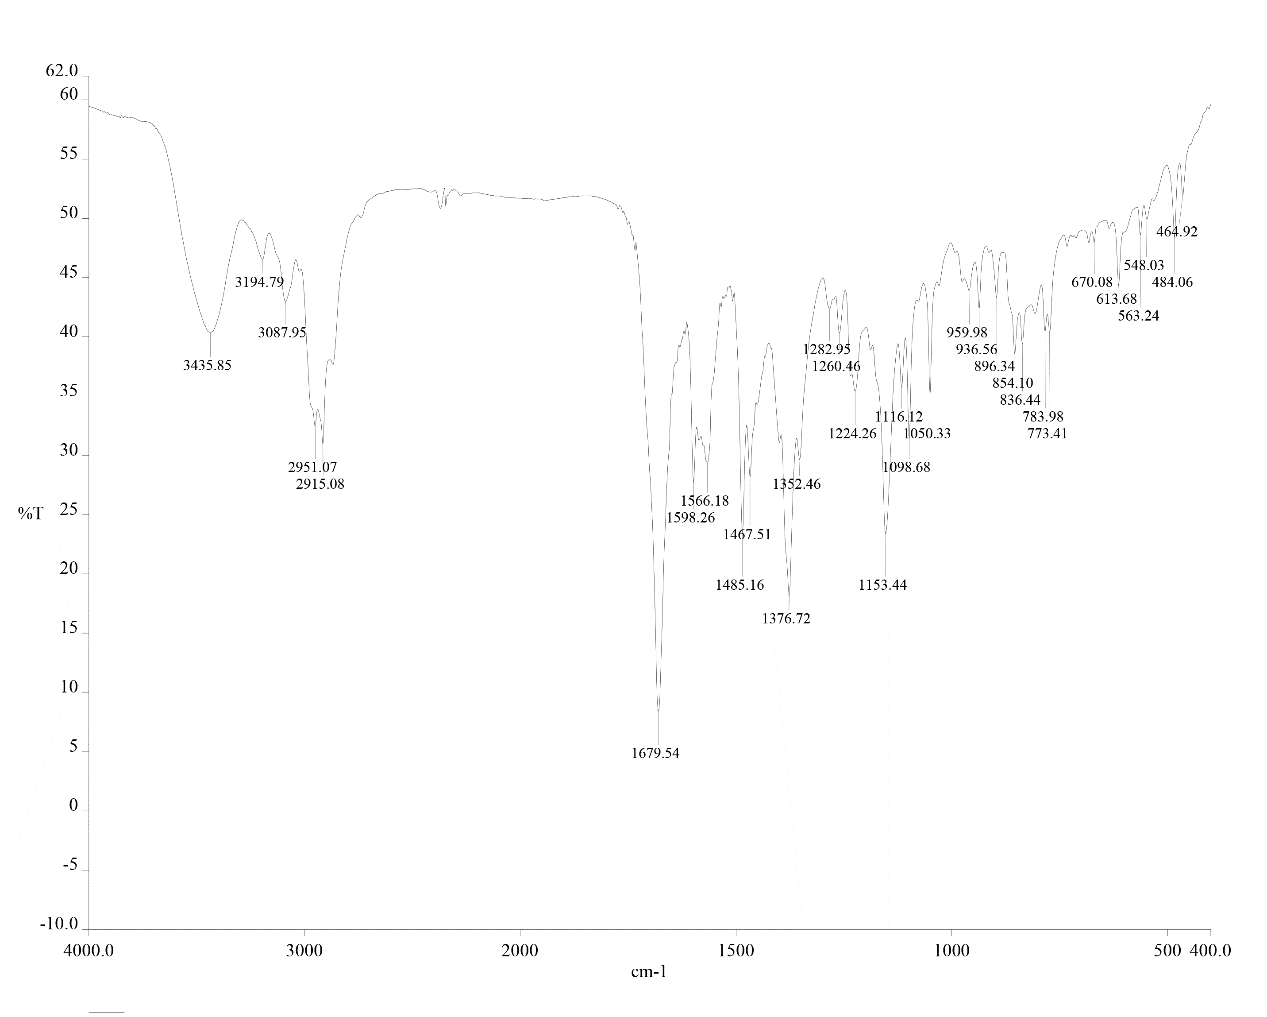


**Figure S**  31. IR of compound 6h


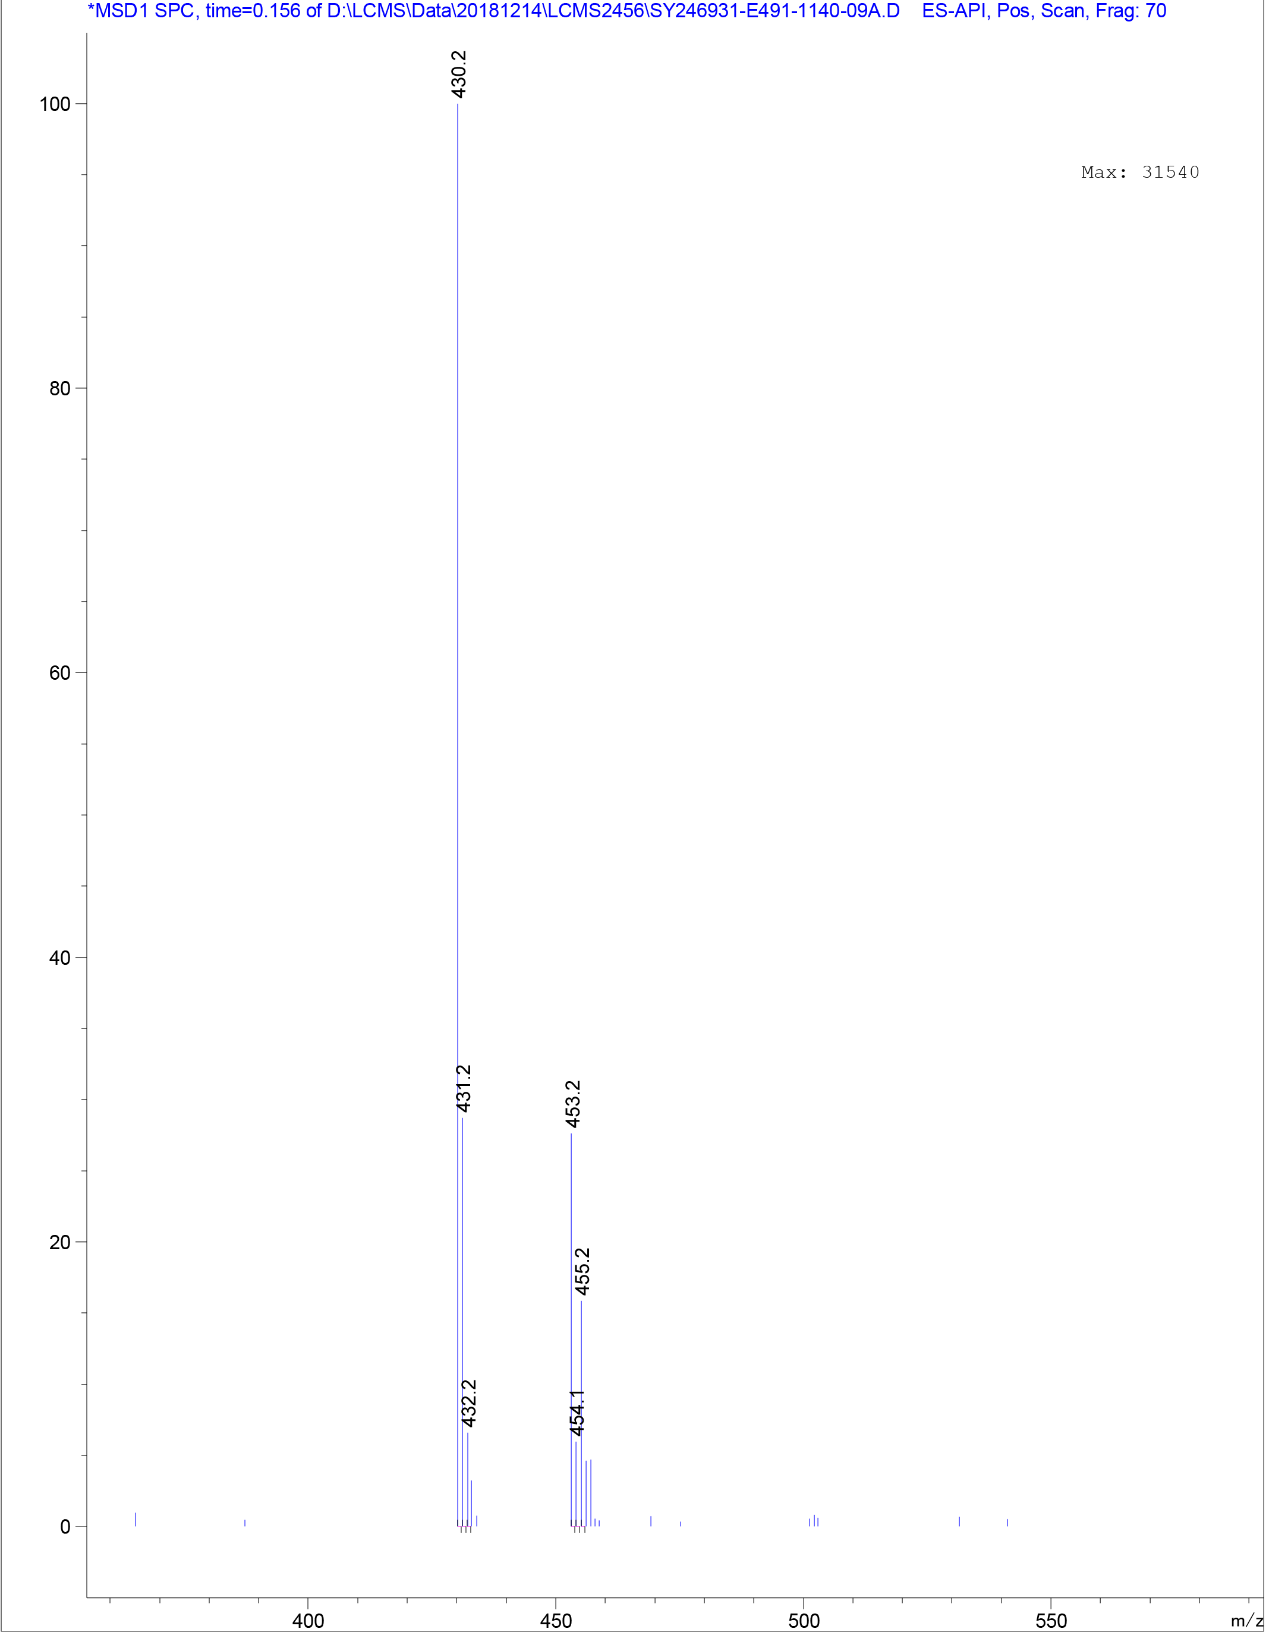


**Figure S**  32. ESI-MS of compound 6h


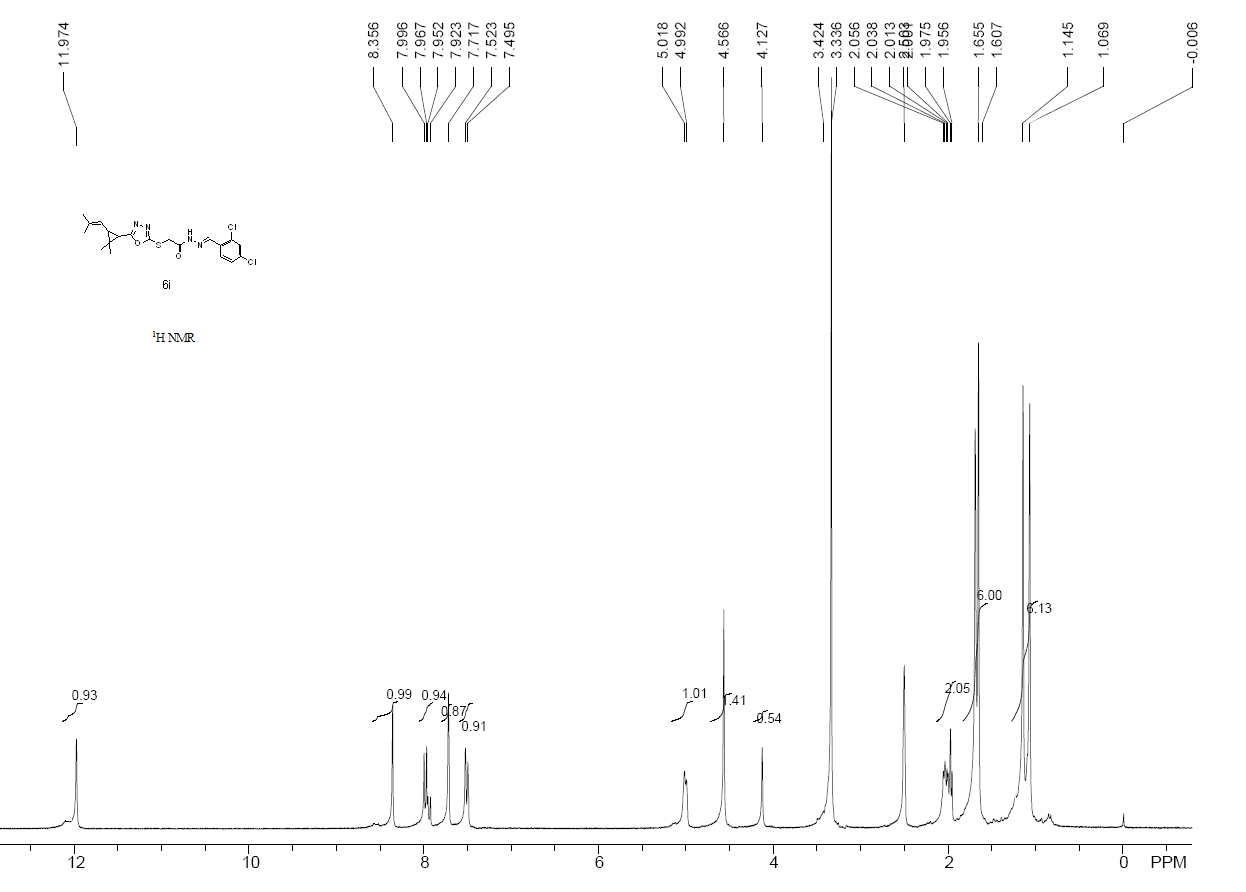


**Figure S**  33. 1H NMR of compound 6i


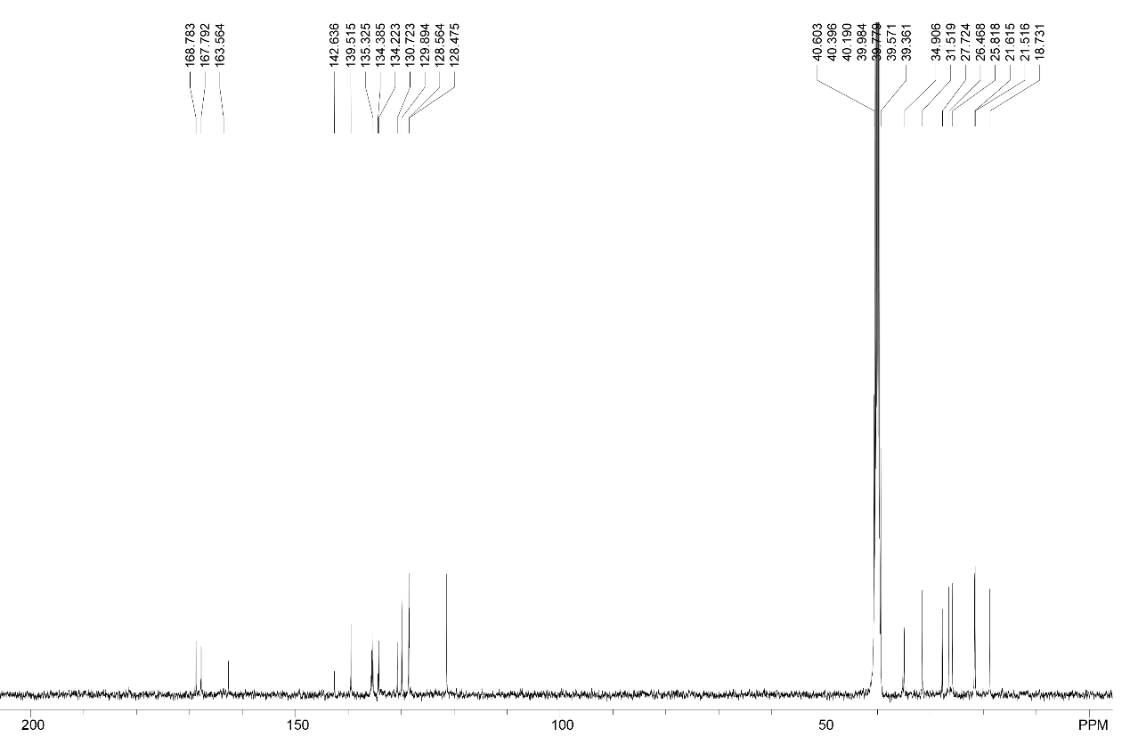


**Figure S**  34. 13C NMR of compound 6i


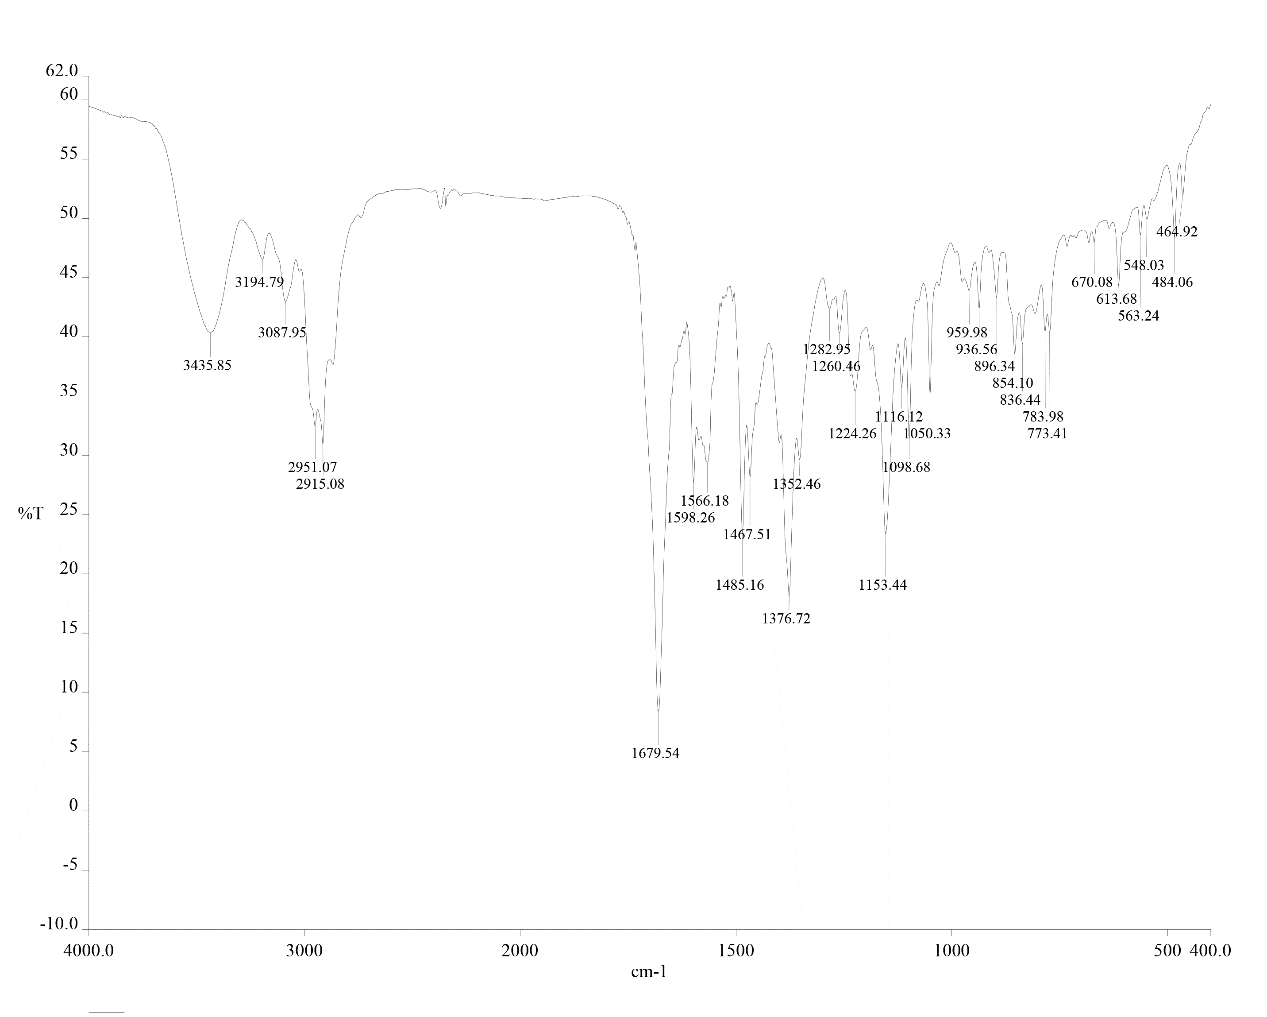


**Figure S**  35. IR of compound 6i


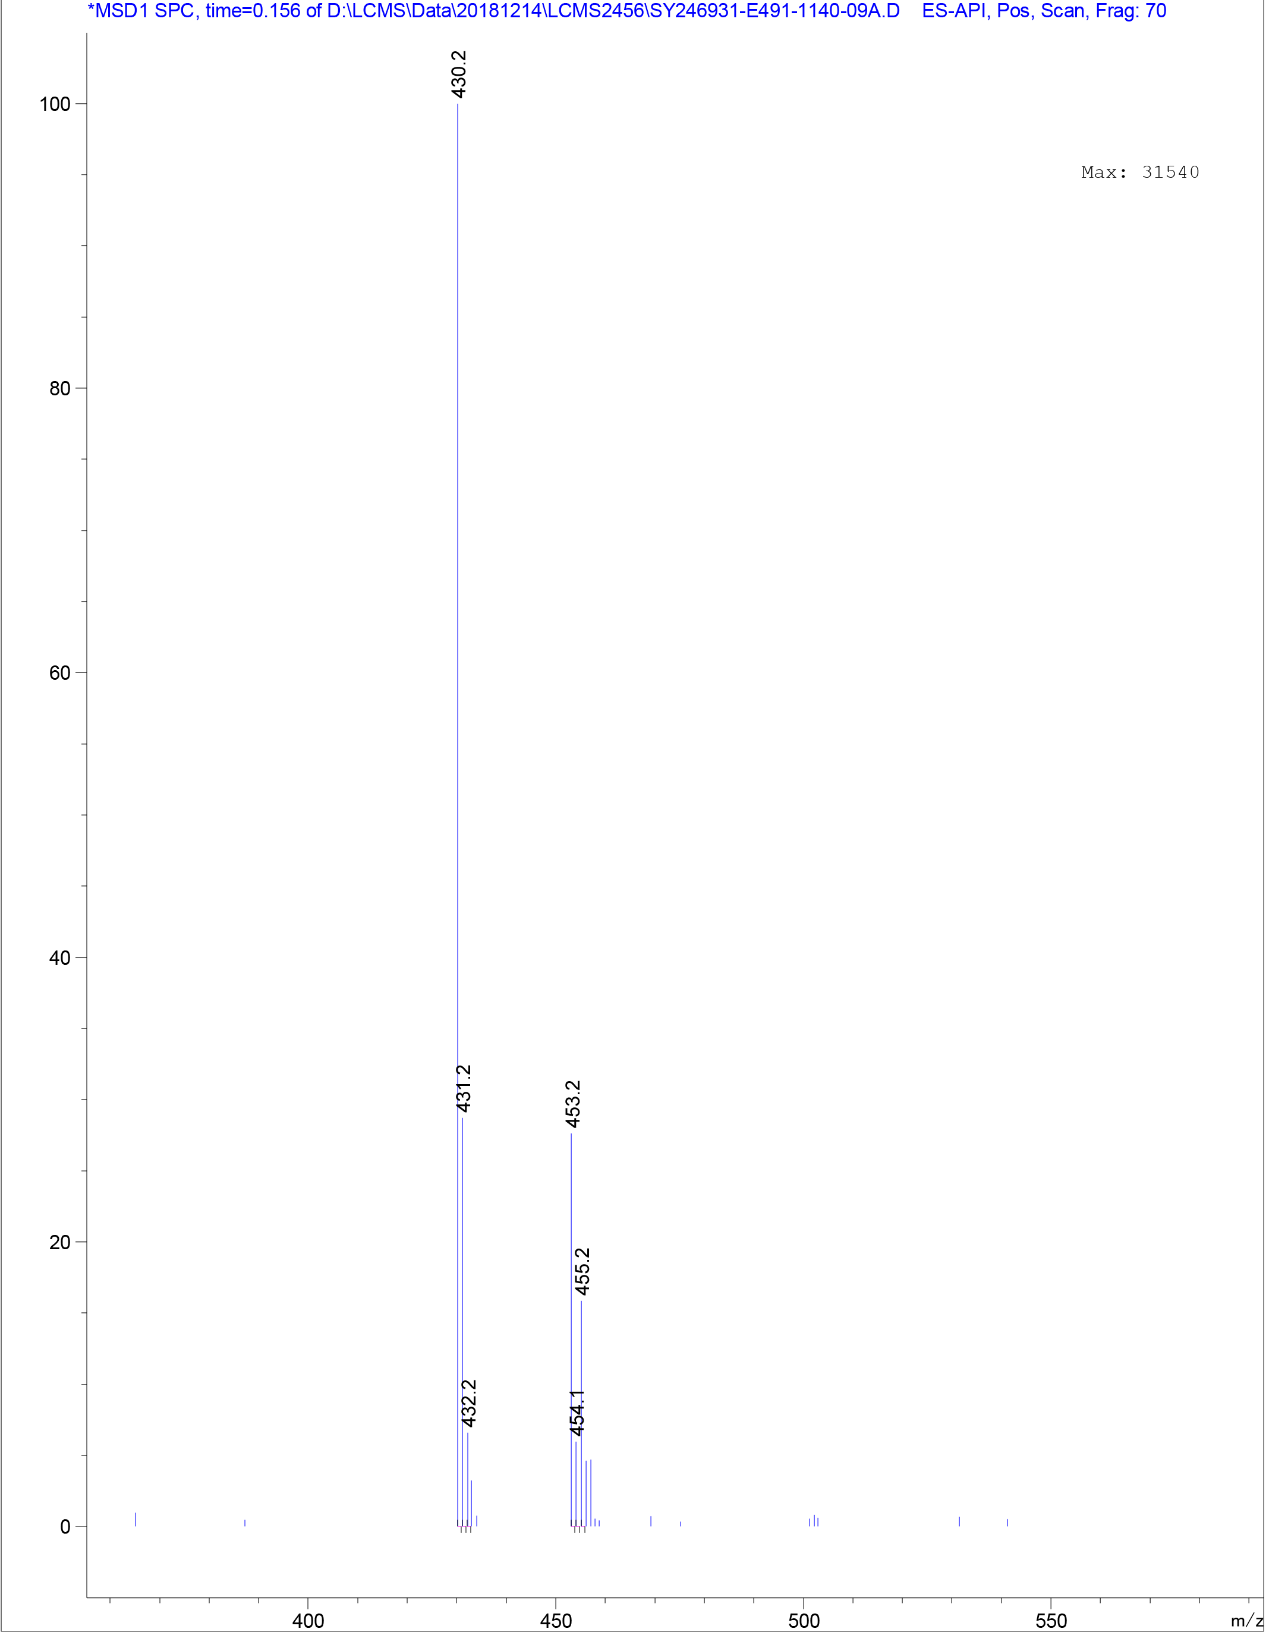


**Figure S**  36. ESI-MS of compound 6i


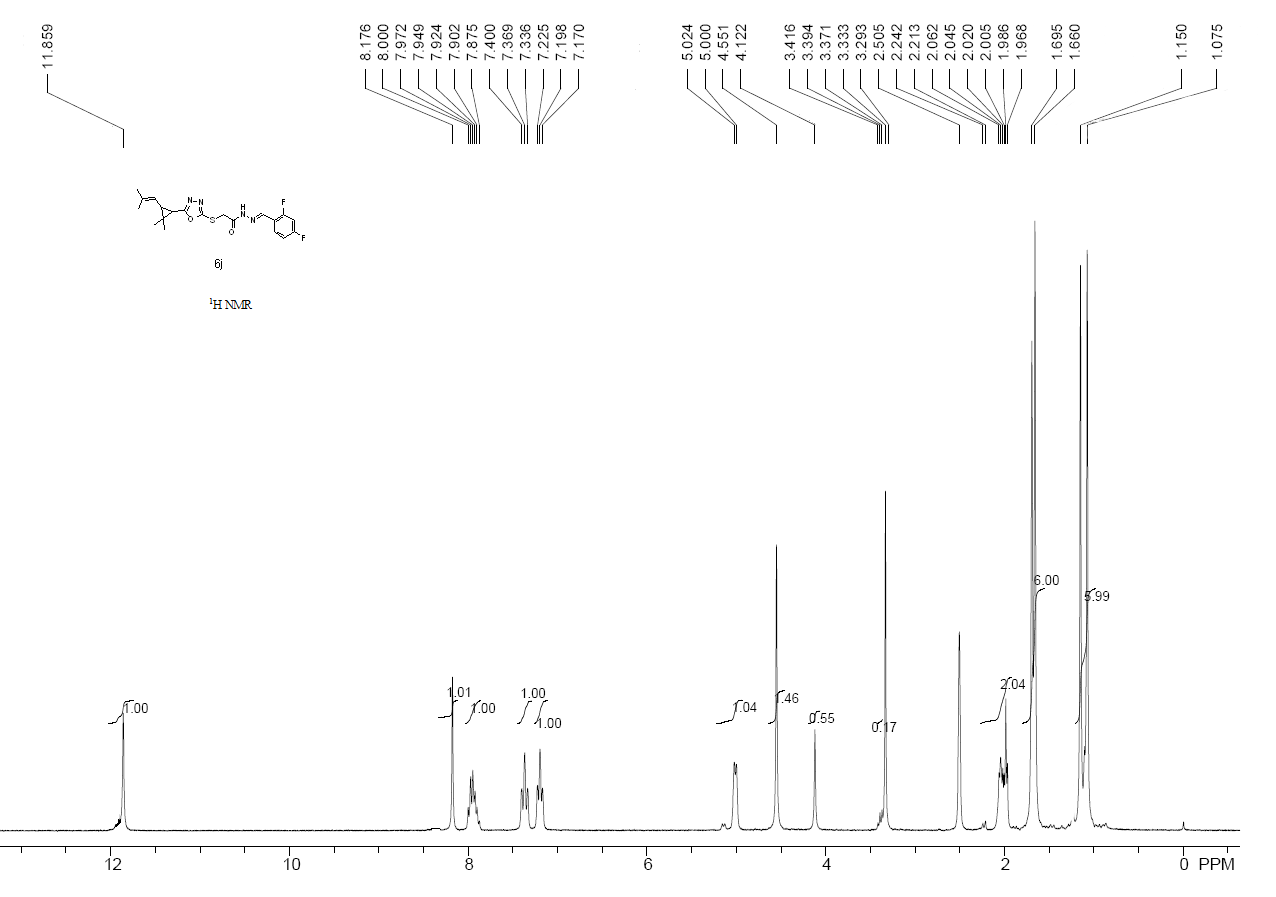


**Figure S**  37. 1H NMR of compound 6j


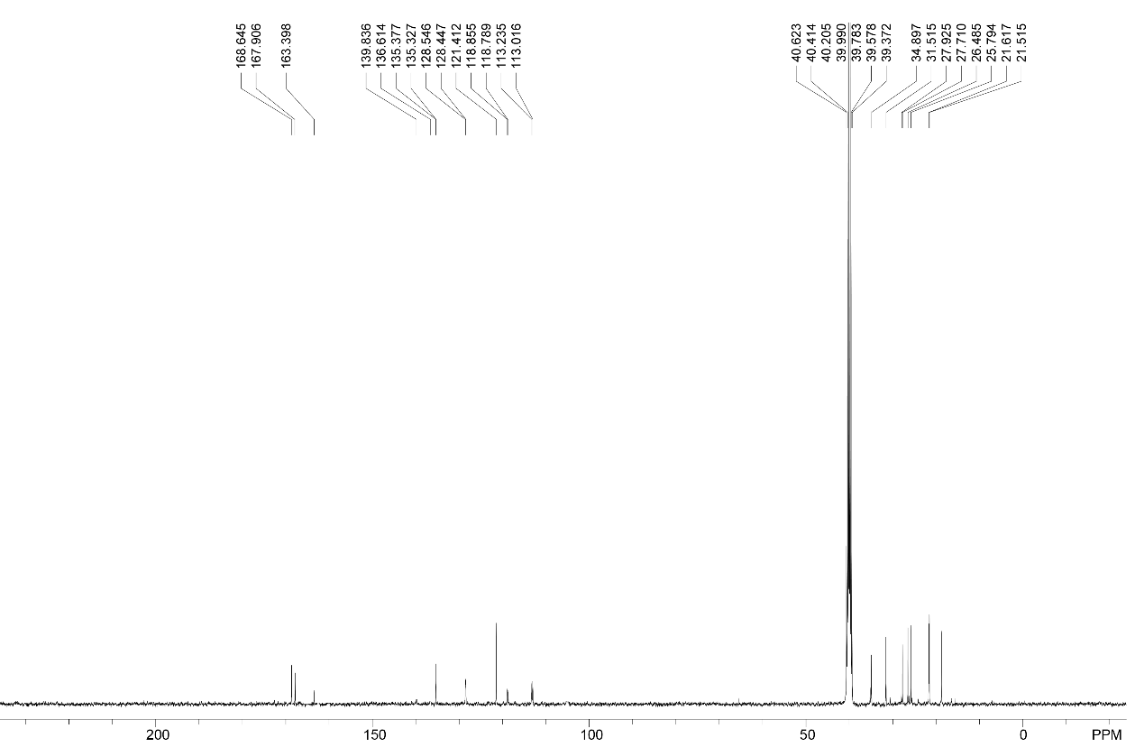


**Figure S**  38. 13C NMR of compound 6j


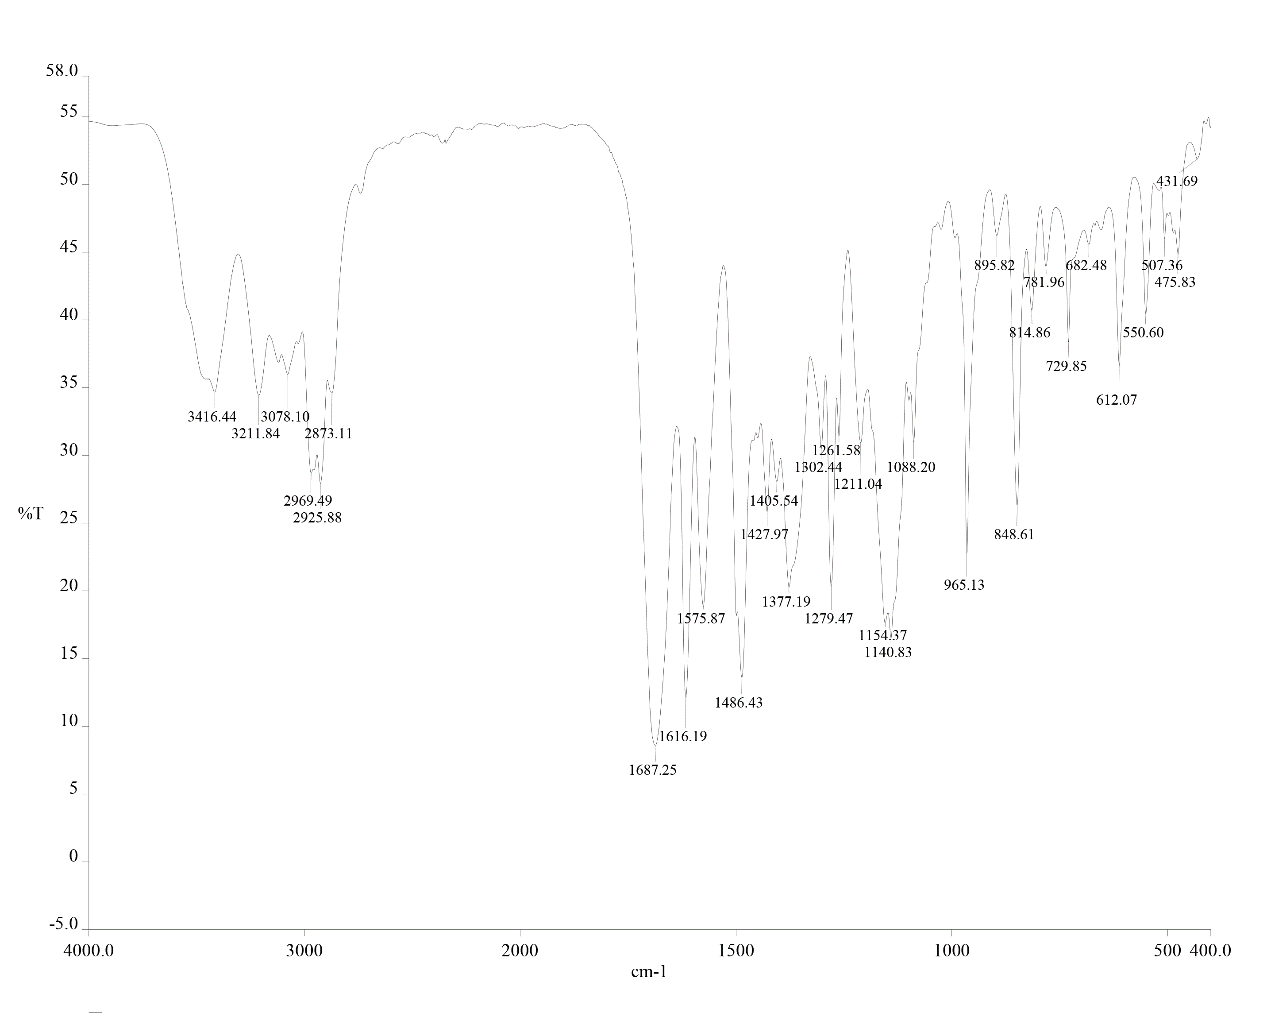


**Figure S**  39. IR of compound 6j


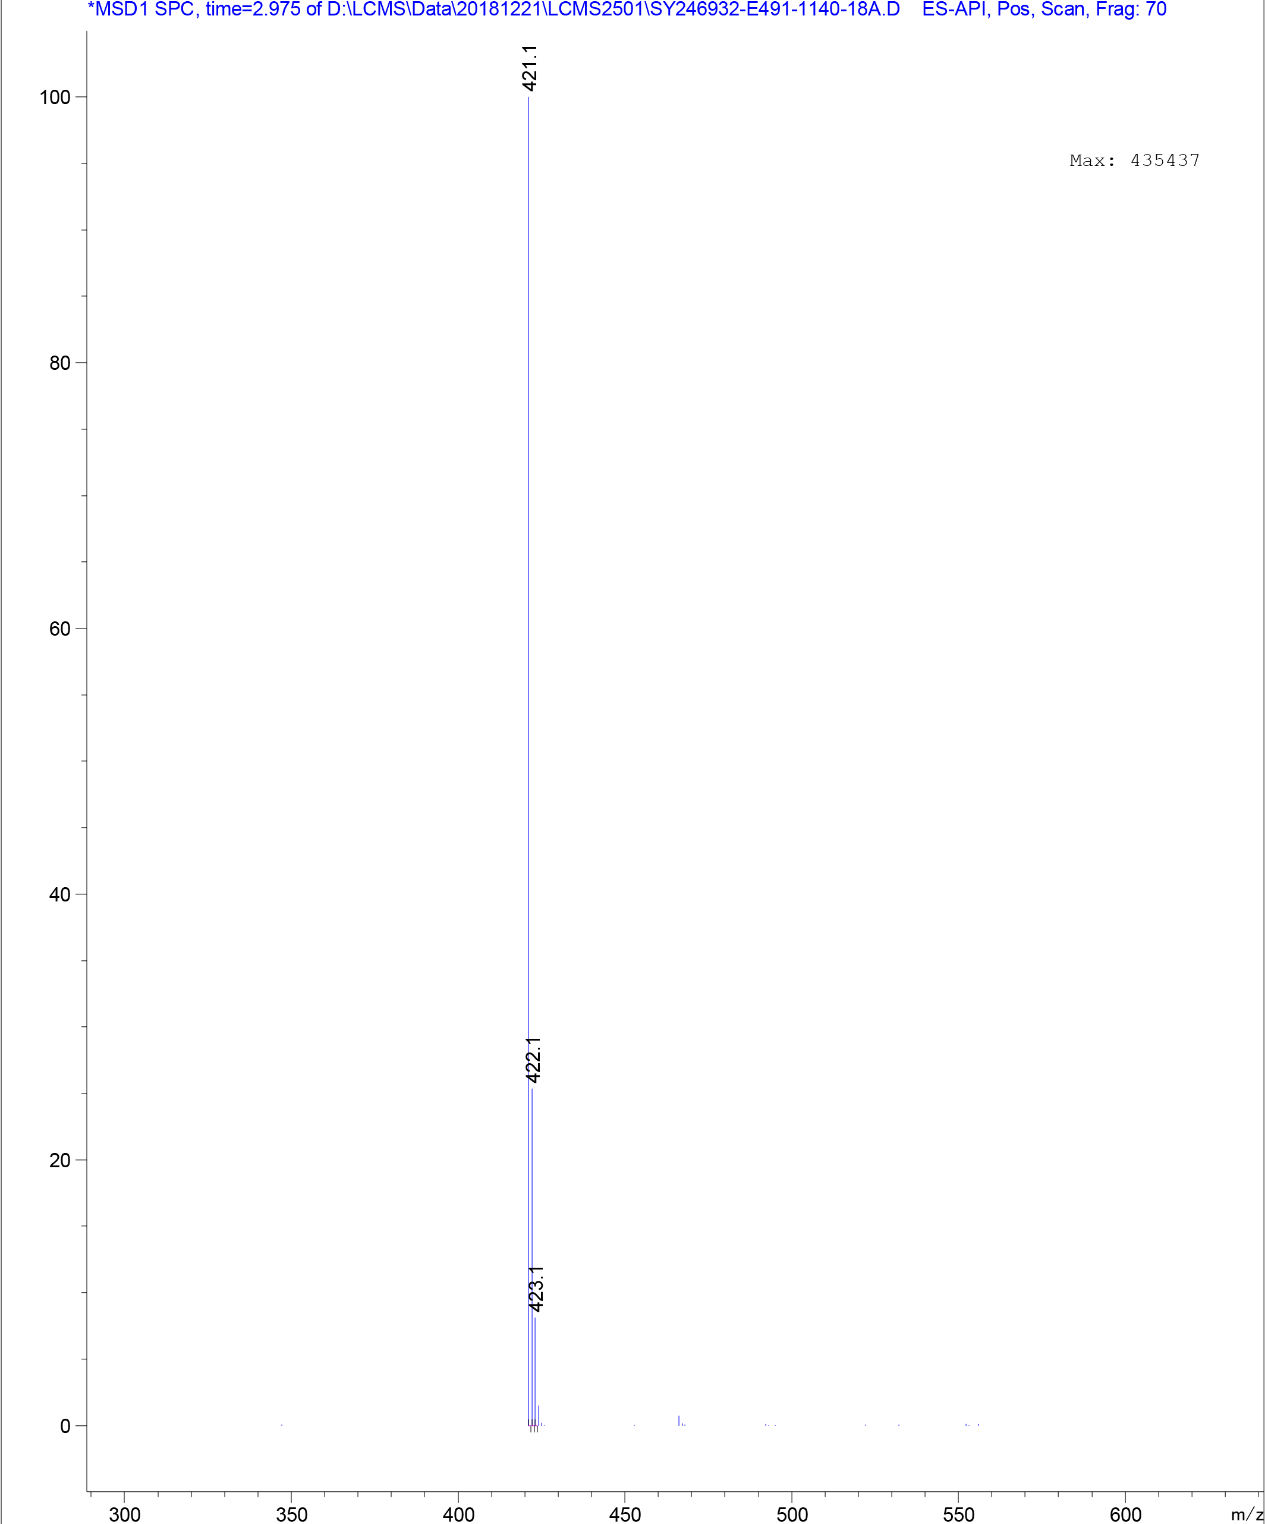


**Figure S**  40. ESI-MS of compound 6j


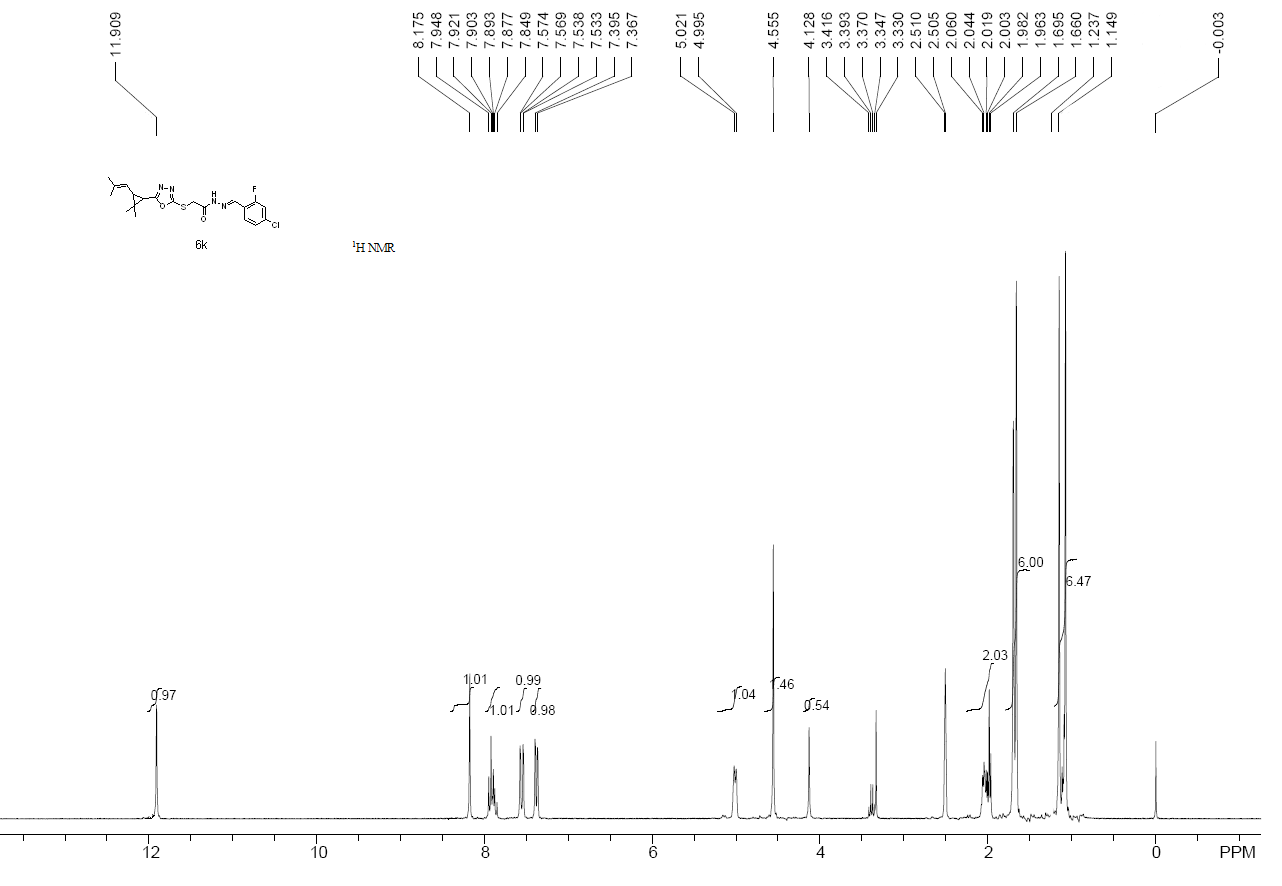


**Figure S**  41. 1H NMR of compound 6k


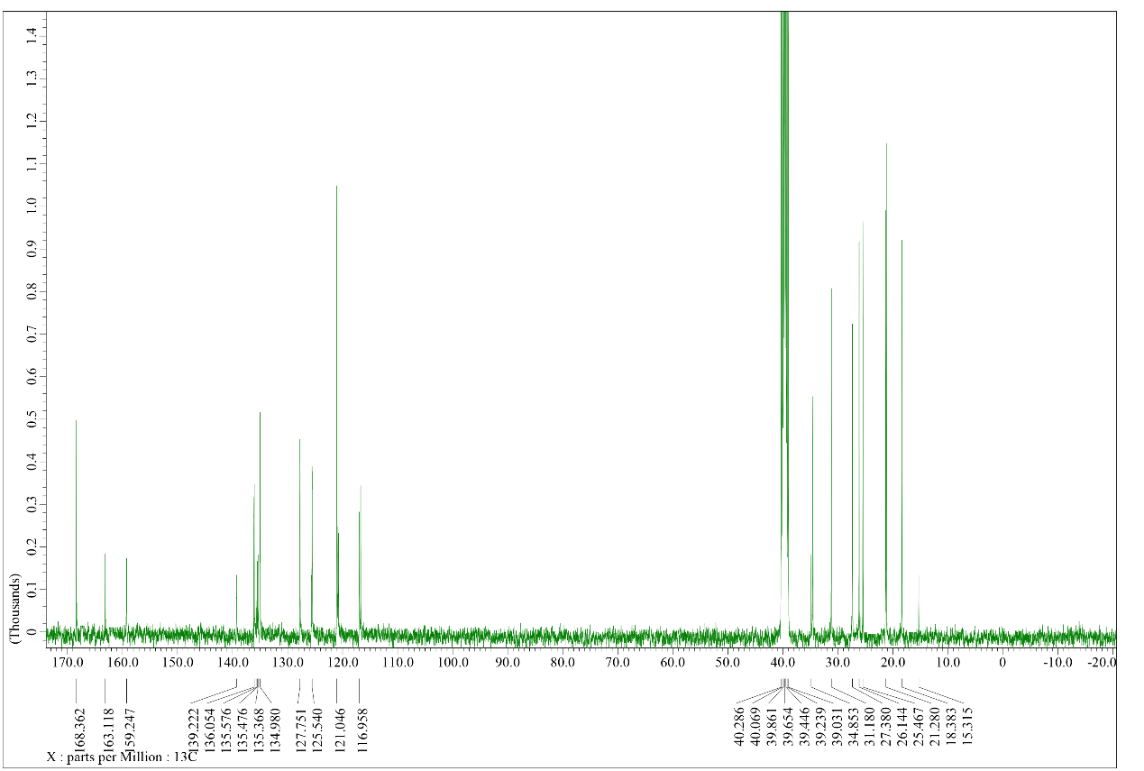


**Figure S**  42. 13C NMR of compound 6k


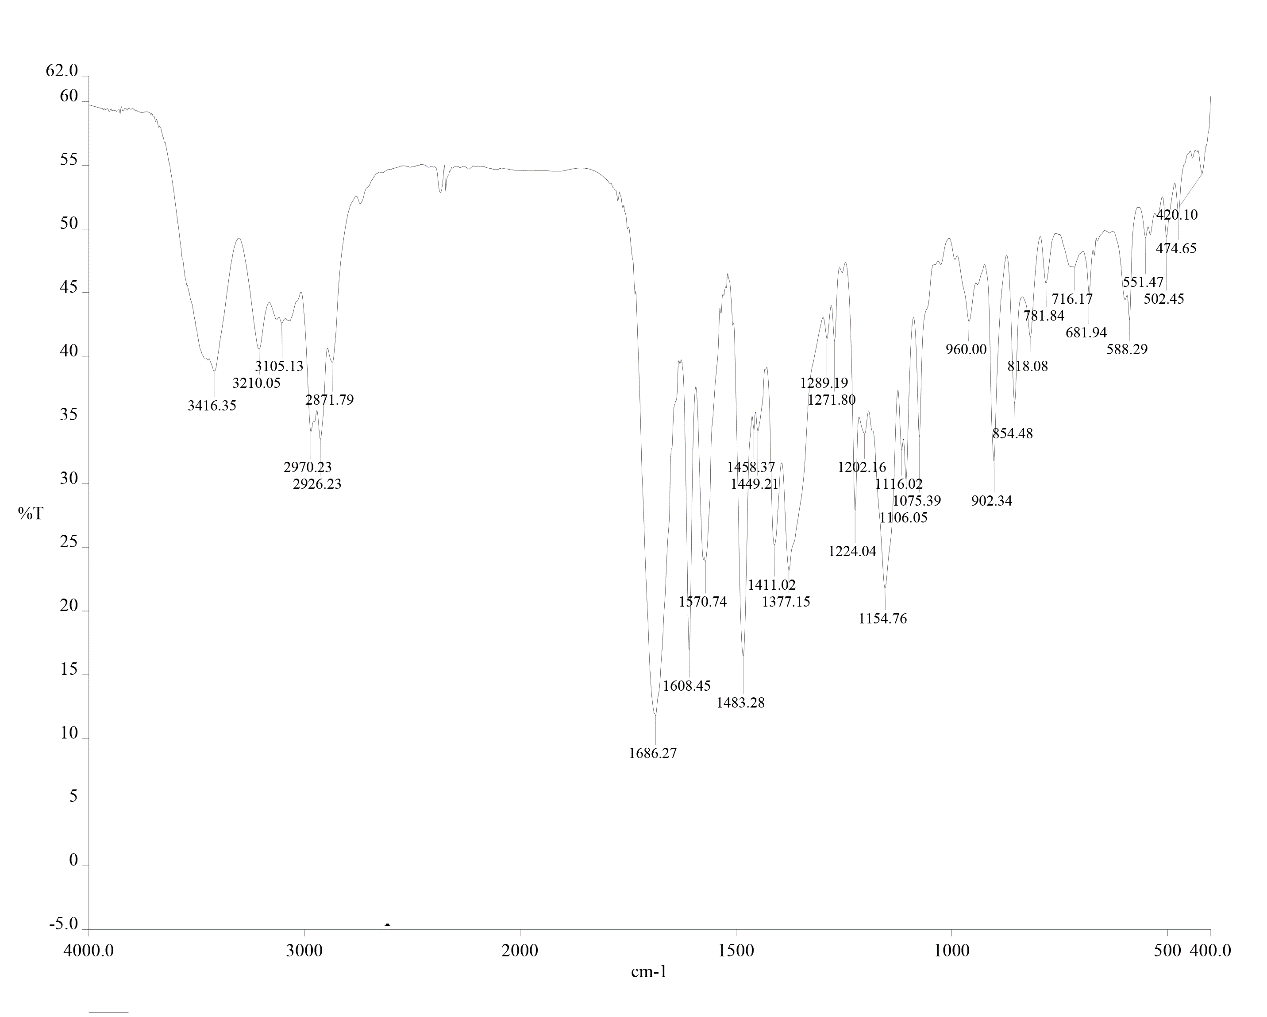


**Figure S**  43. IR of compound 6k


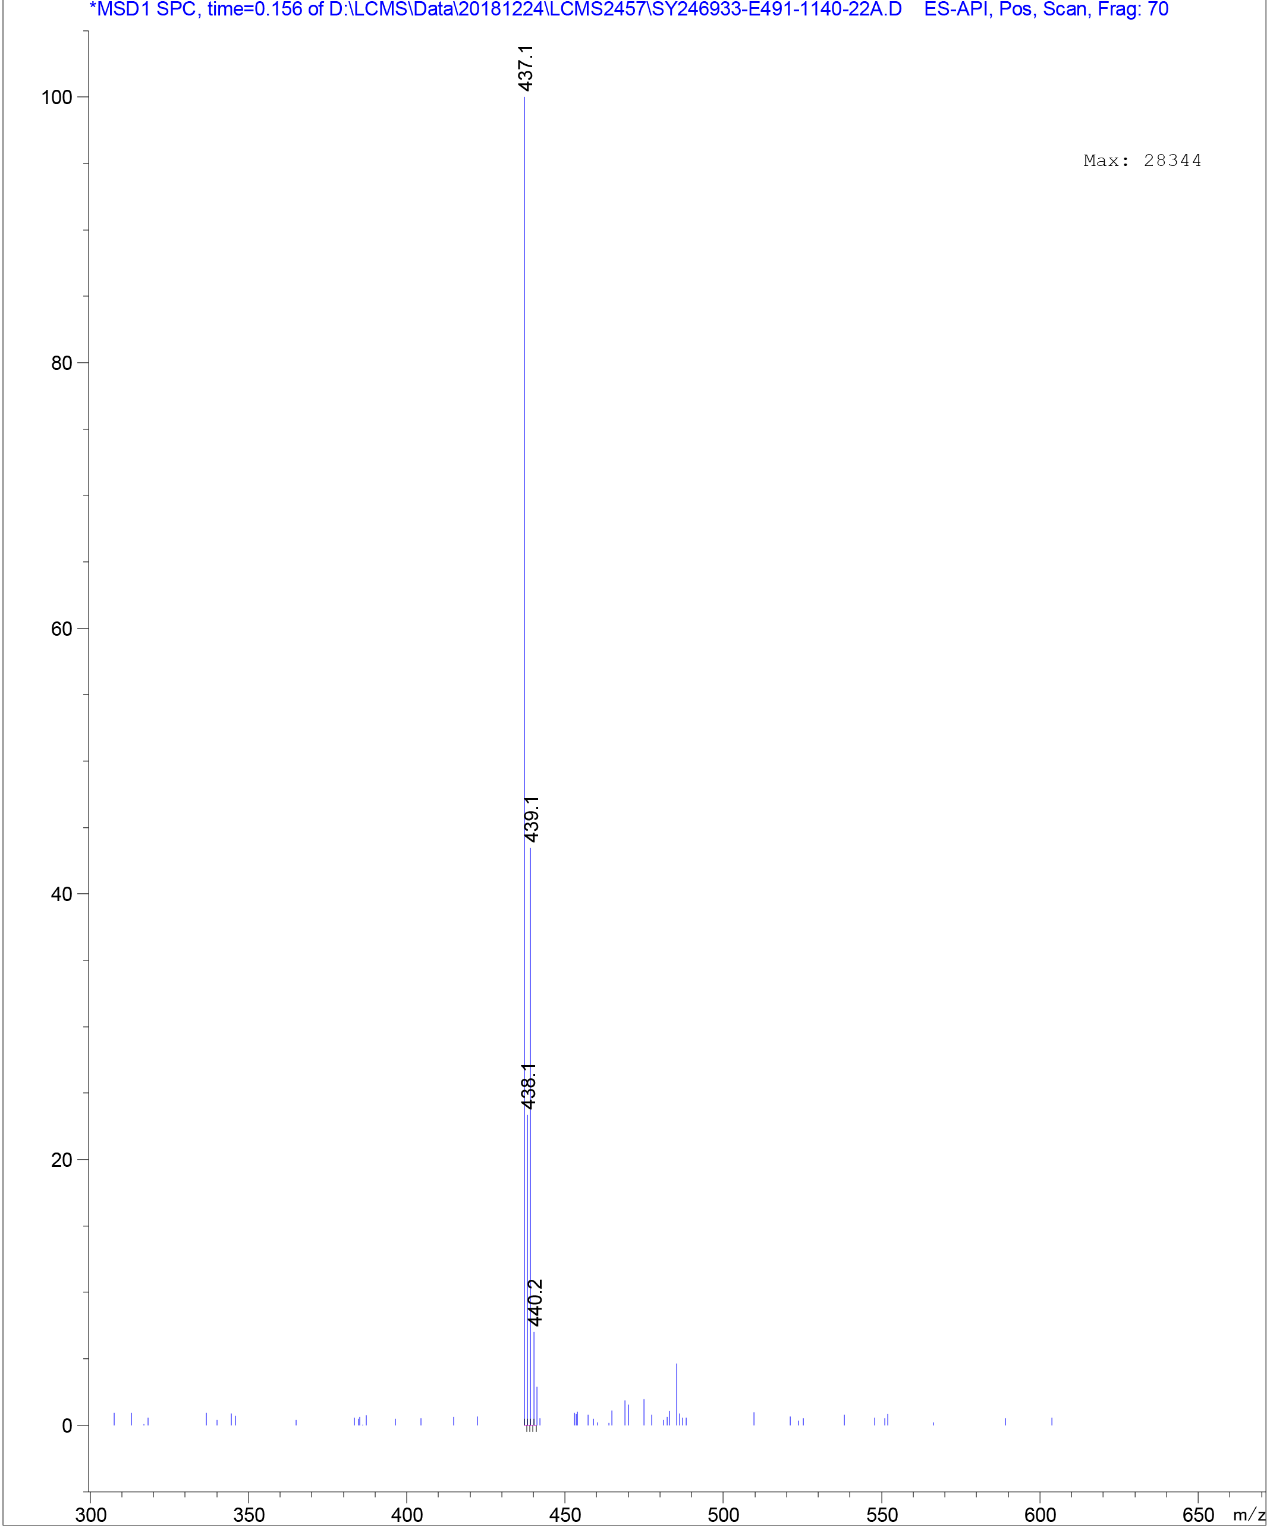


**Figure S**  44. ESI-MS of compound 6k


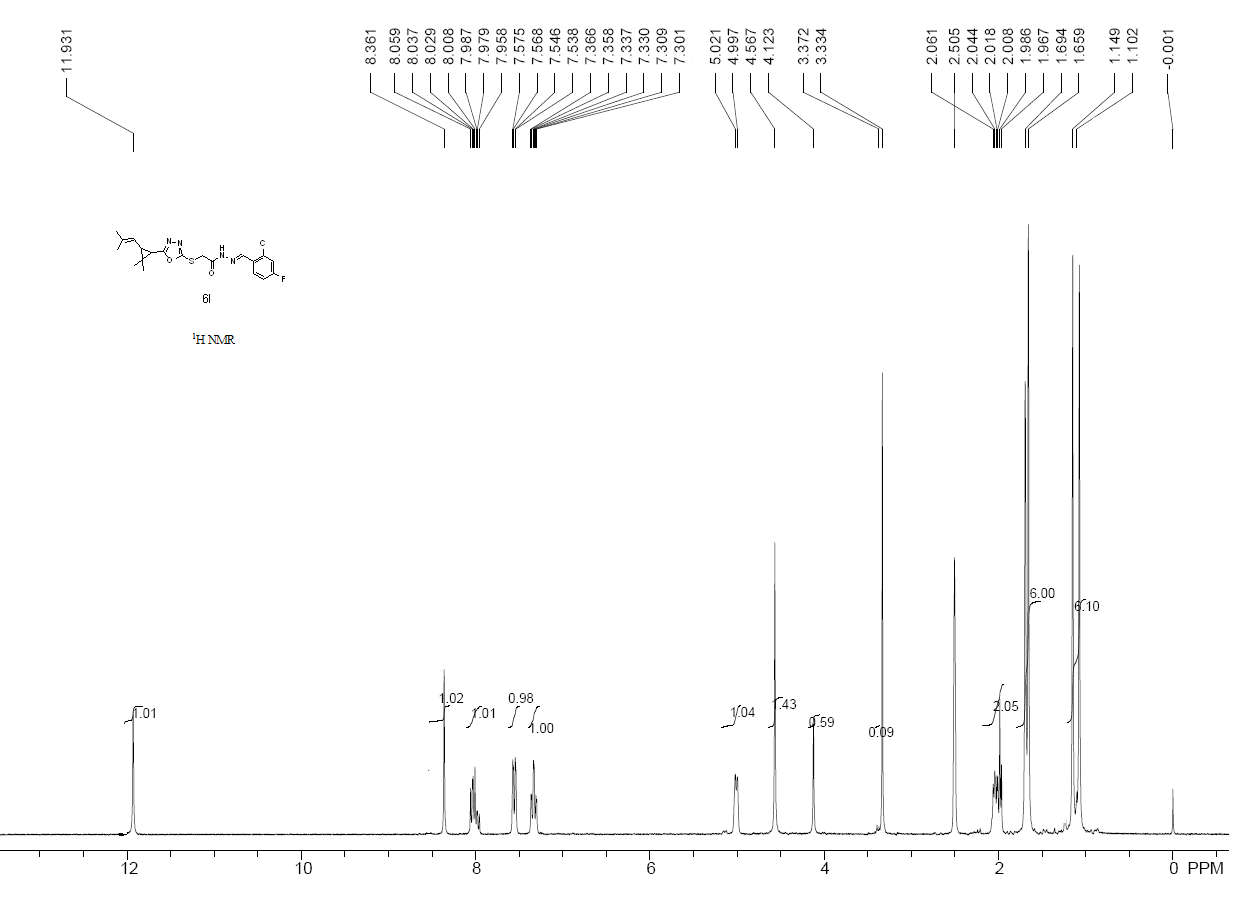


**Figure S**  45. 1H NMR of compound 6l


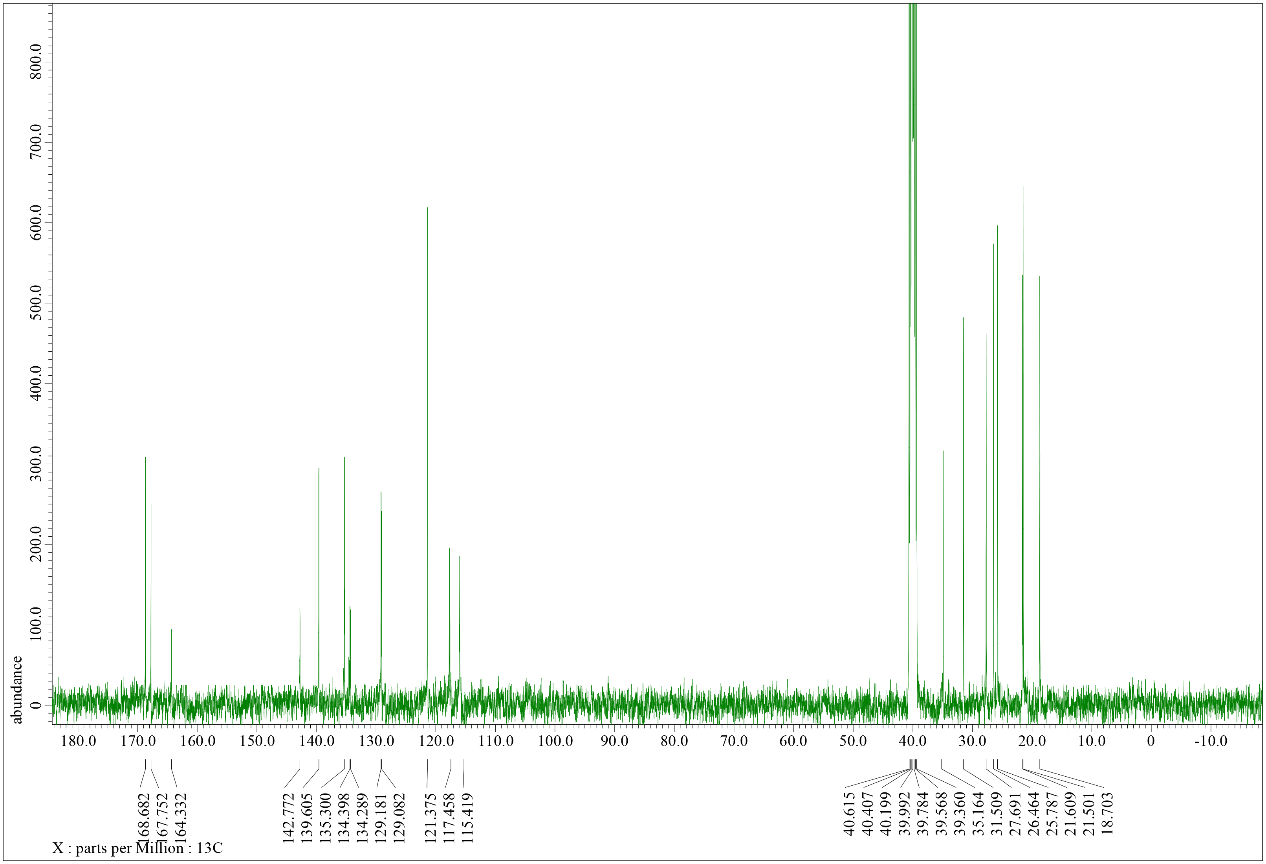


**Figure S**  46. 13C NMR of compound 6l


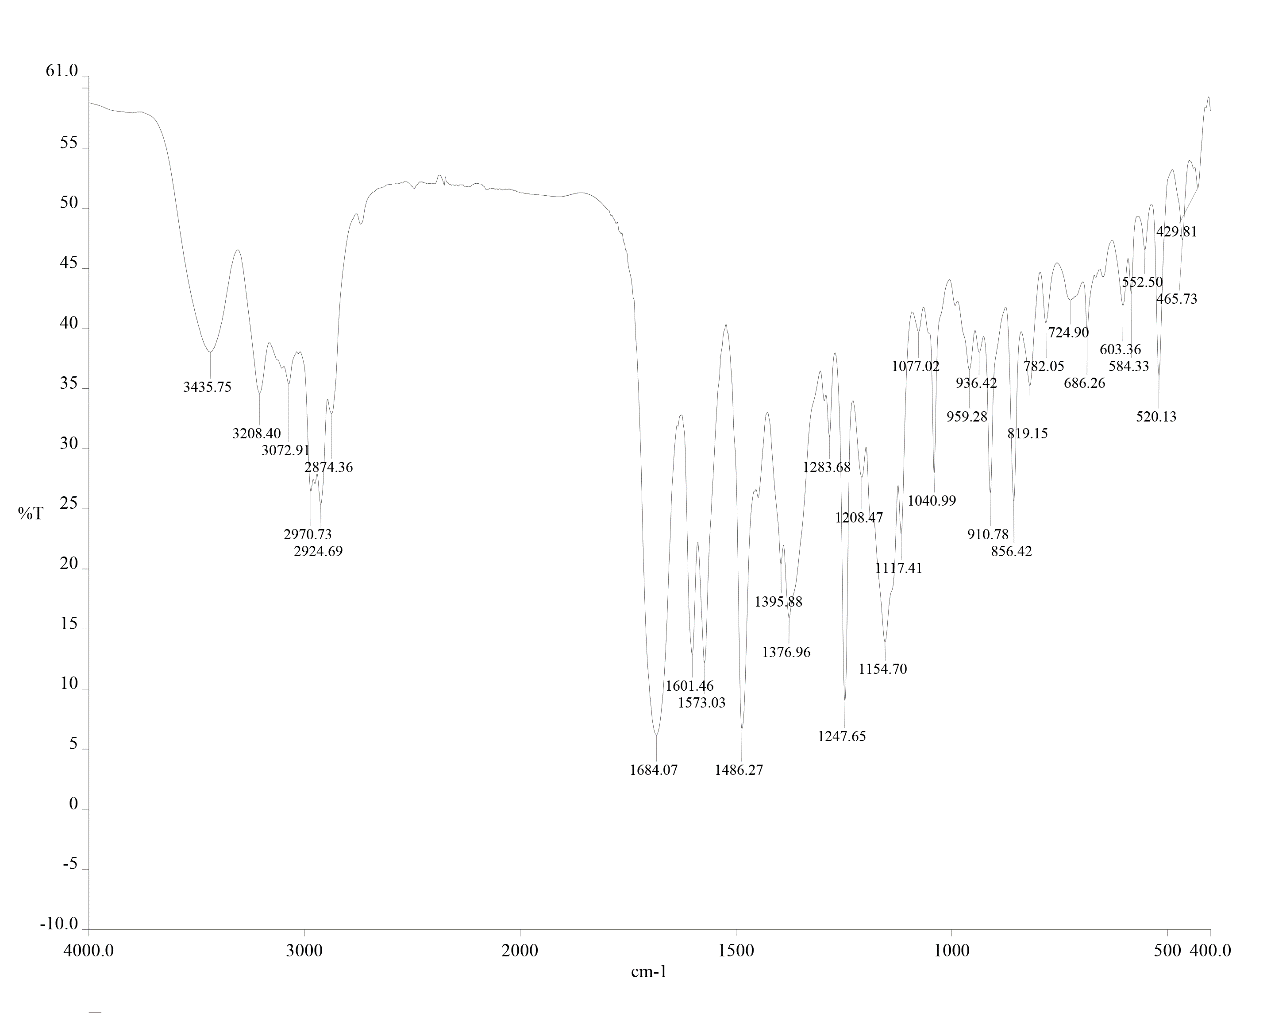


**Figure S**  47. IR of compound 6l


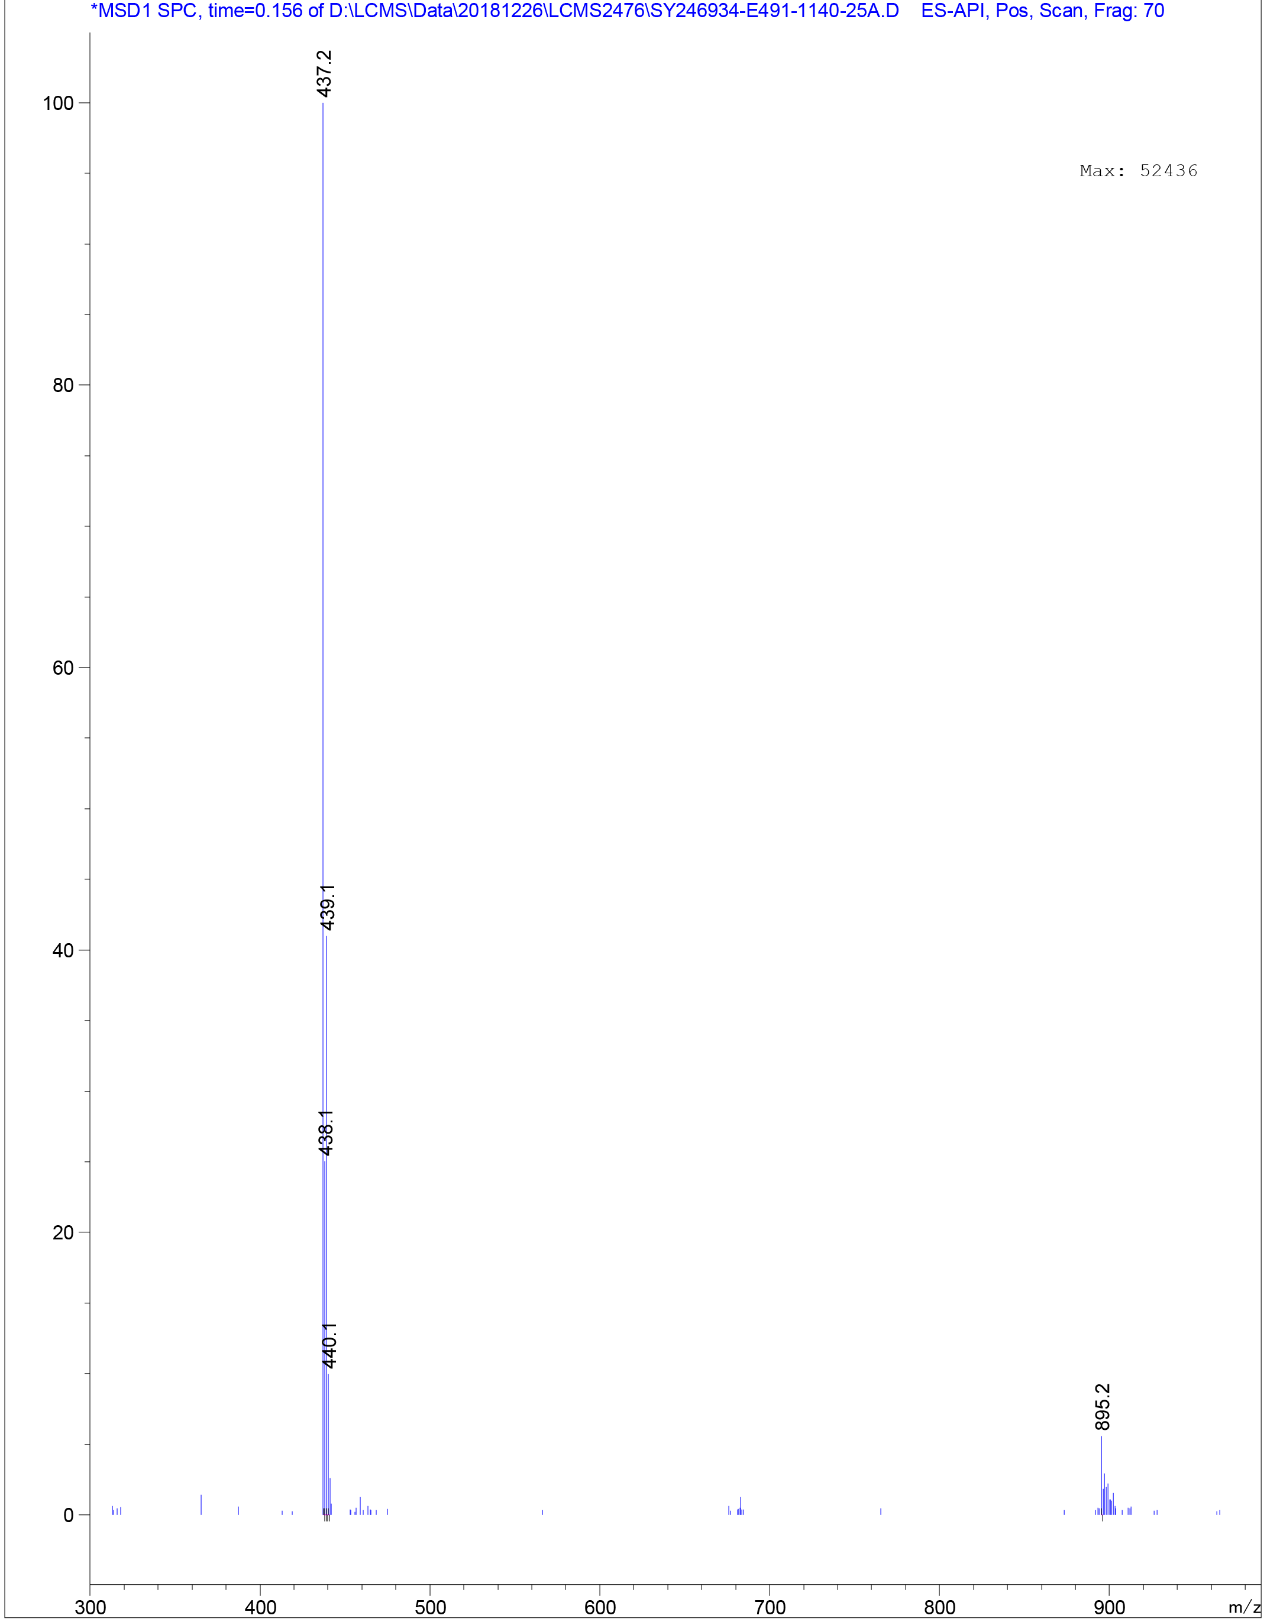


**Figure S**  48. ESI-MS of compound 6l


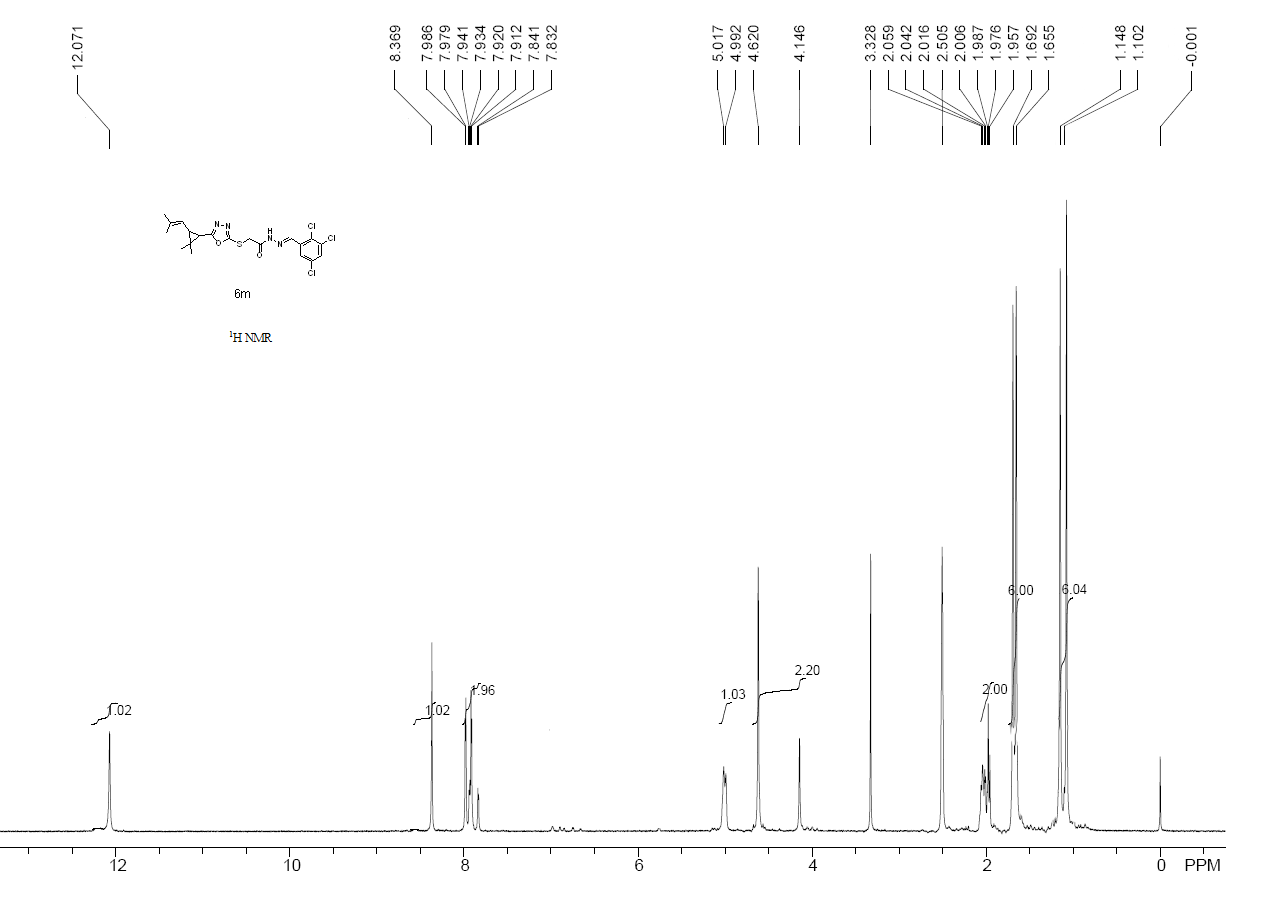


**Figure S**  49. 1H NMR of compound 6m


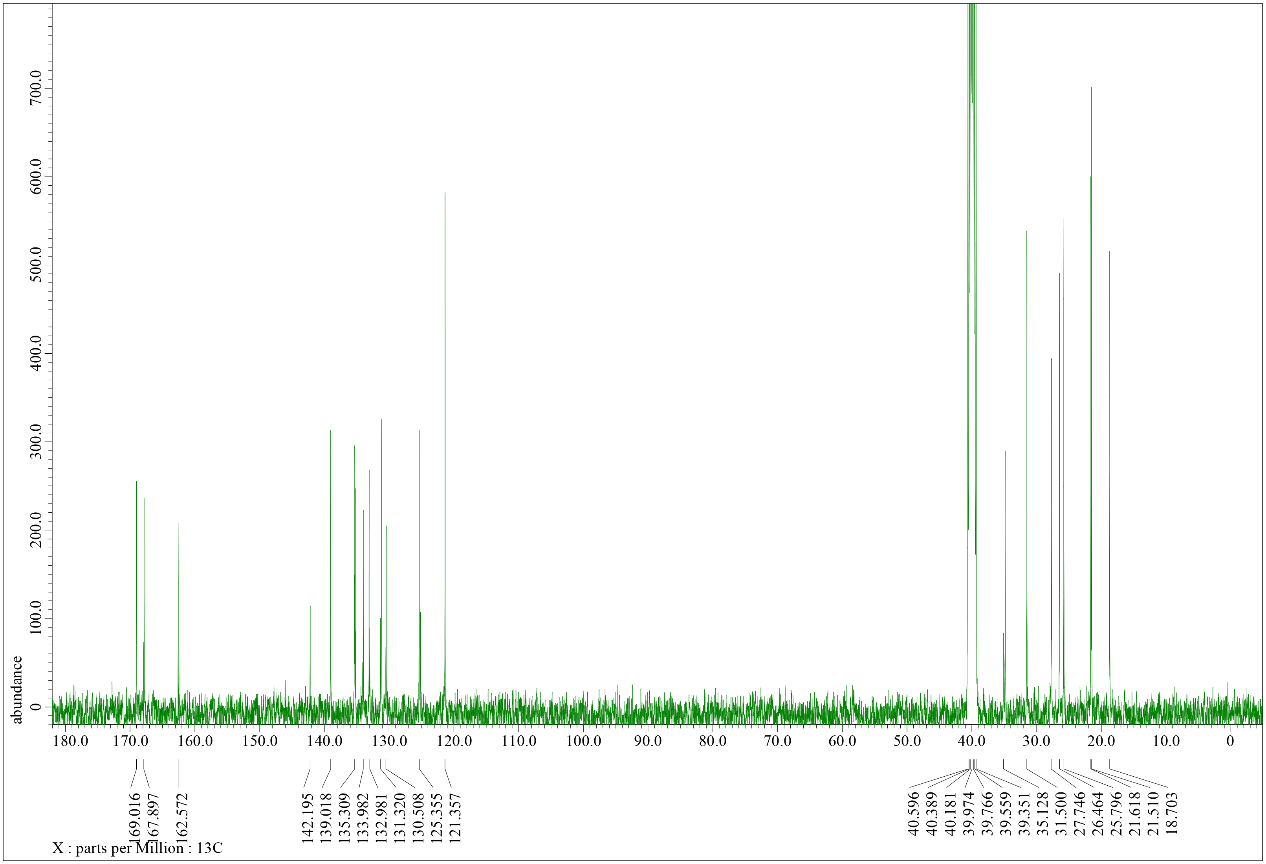


**Figure S**  50. 13C NMR of compound 6m


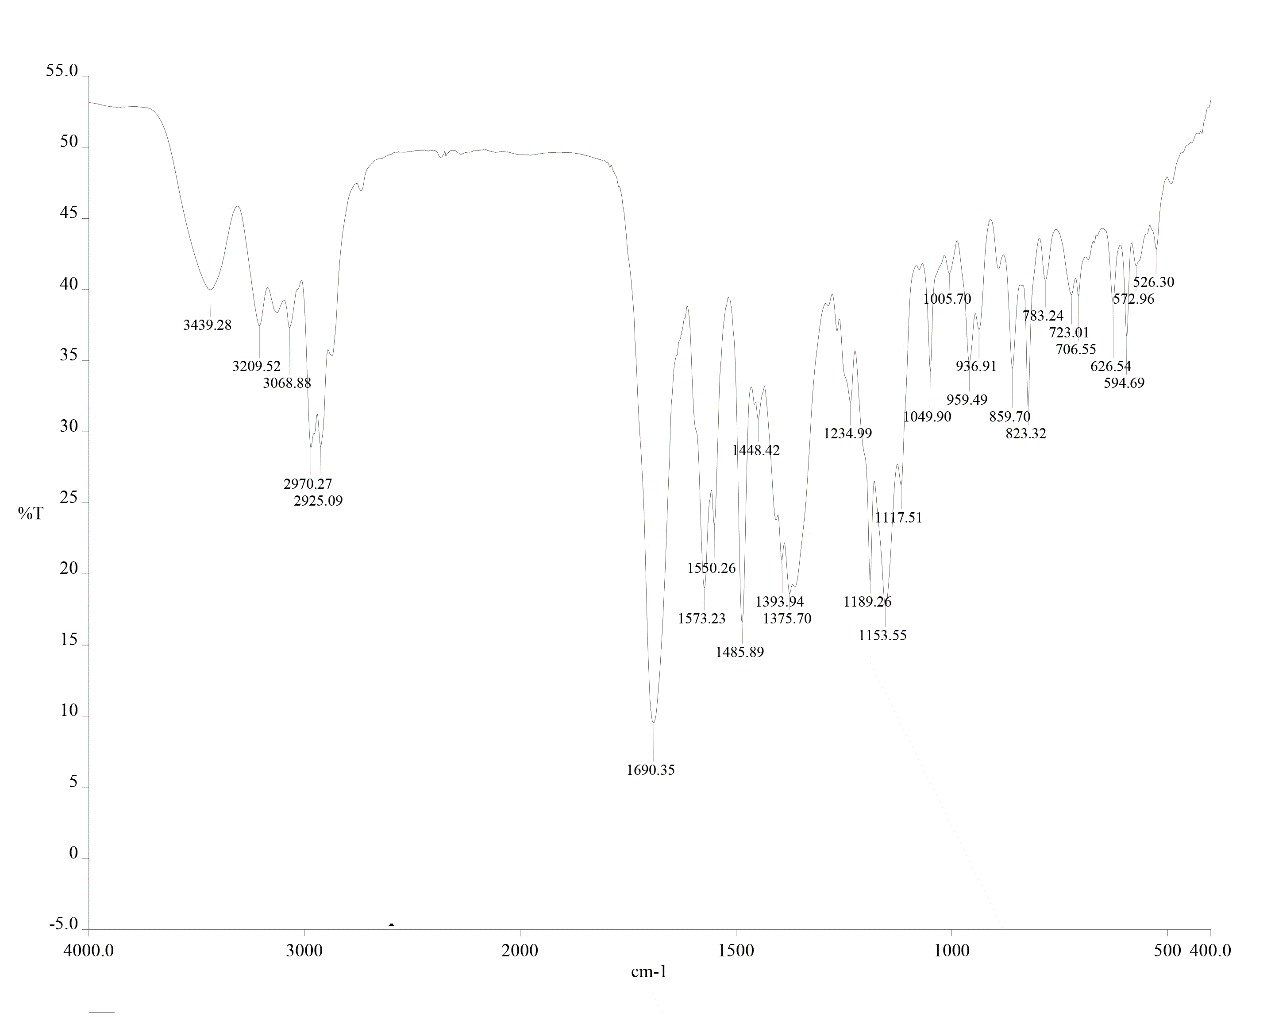


**Figure S**  51. IR of compound 6m


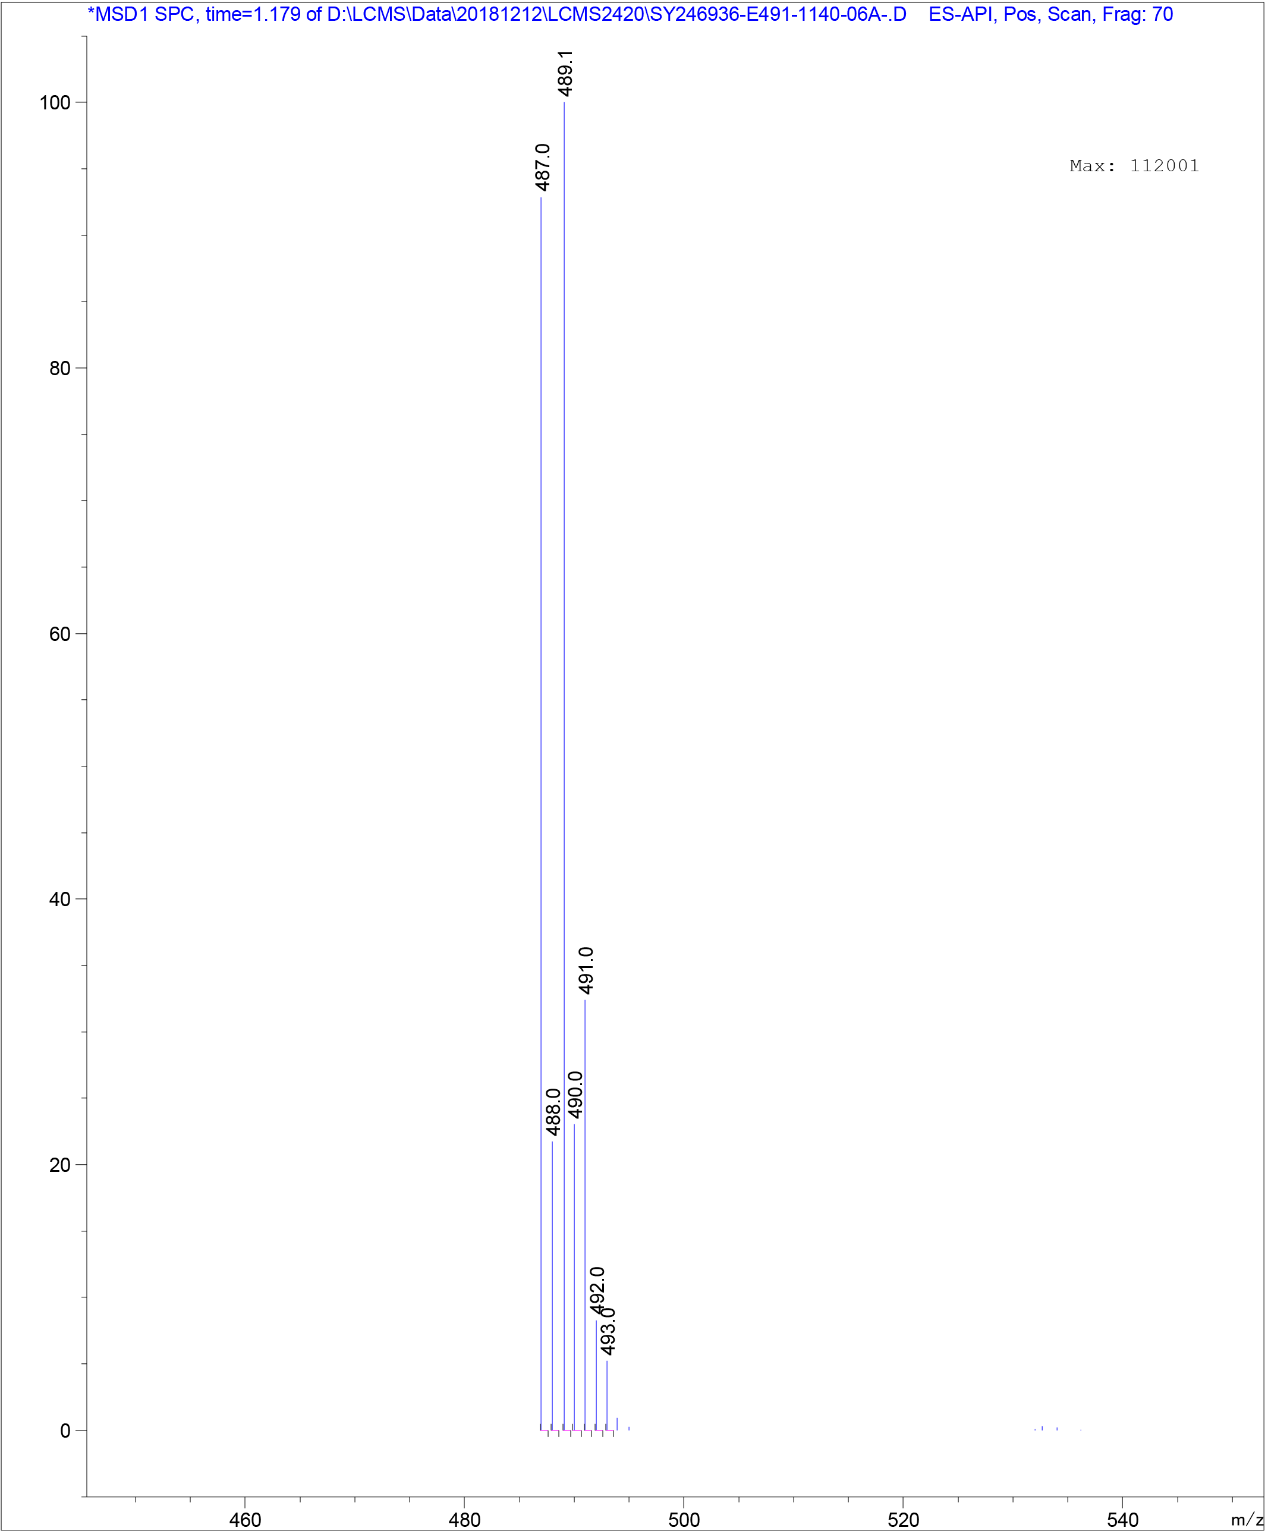


**Figure S**  52. ESI-MS of compound 6m


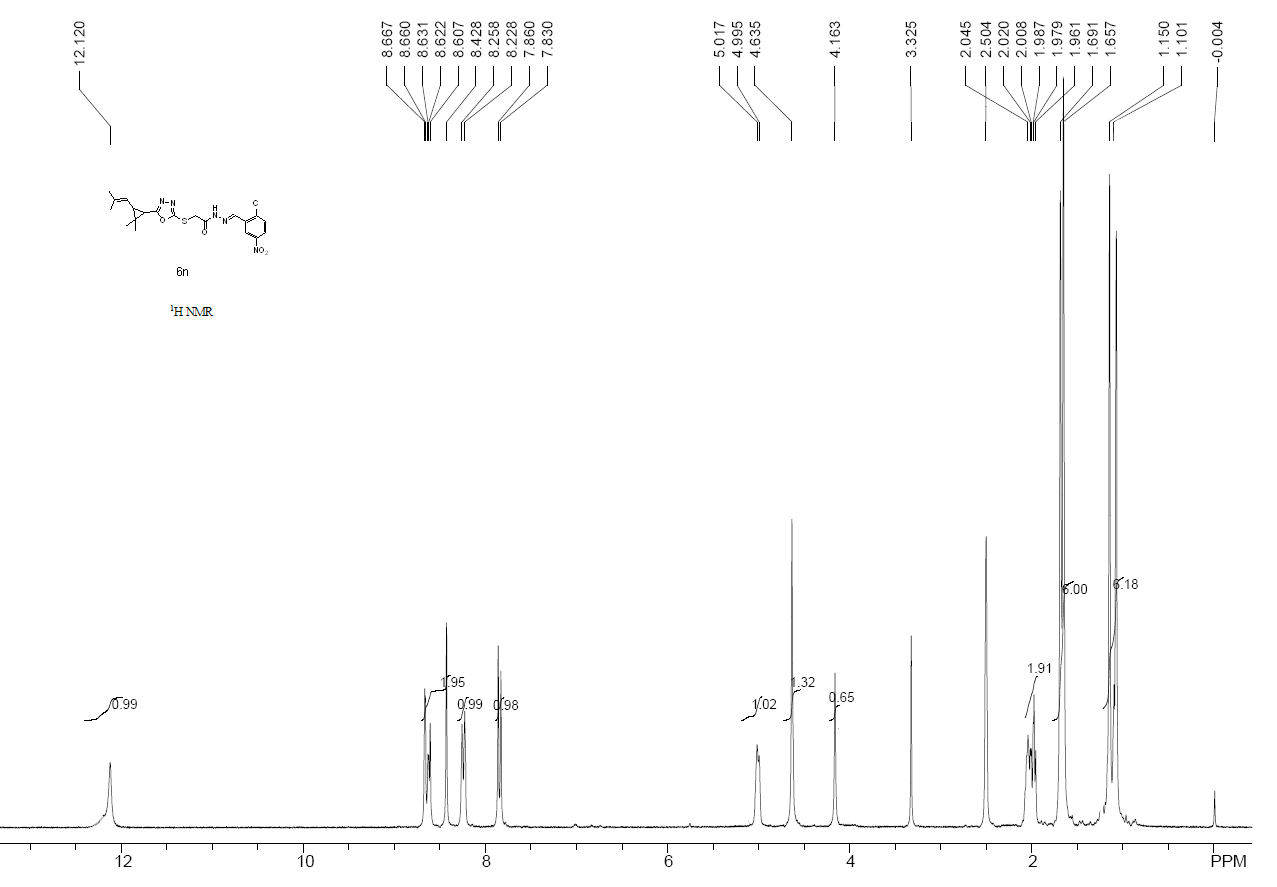


**Figure S**  53. 1H NMR of compound 6n


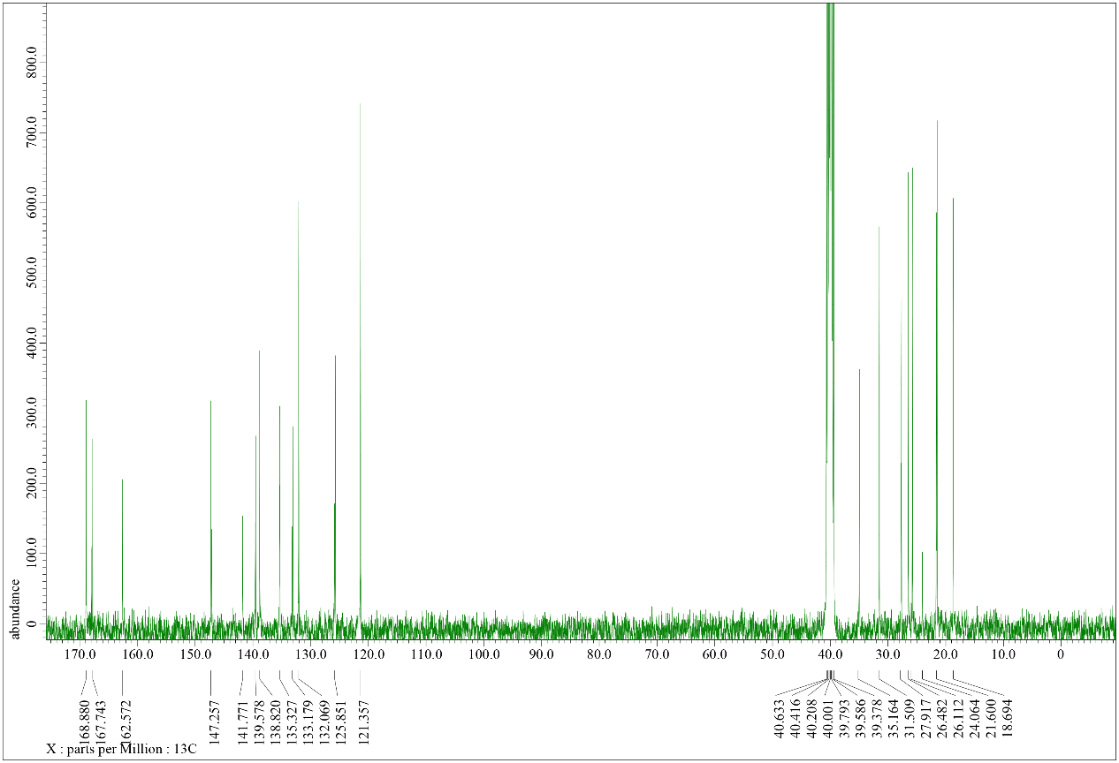


**Figure S**  54. 13C NMR of compound 6n


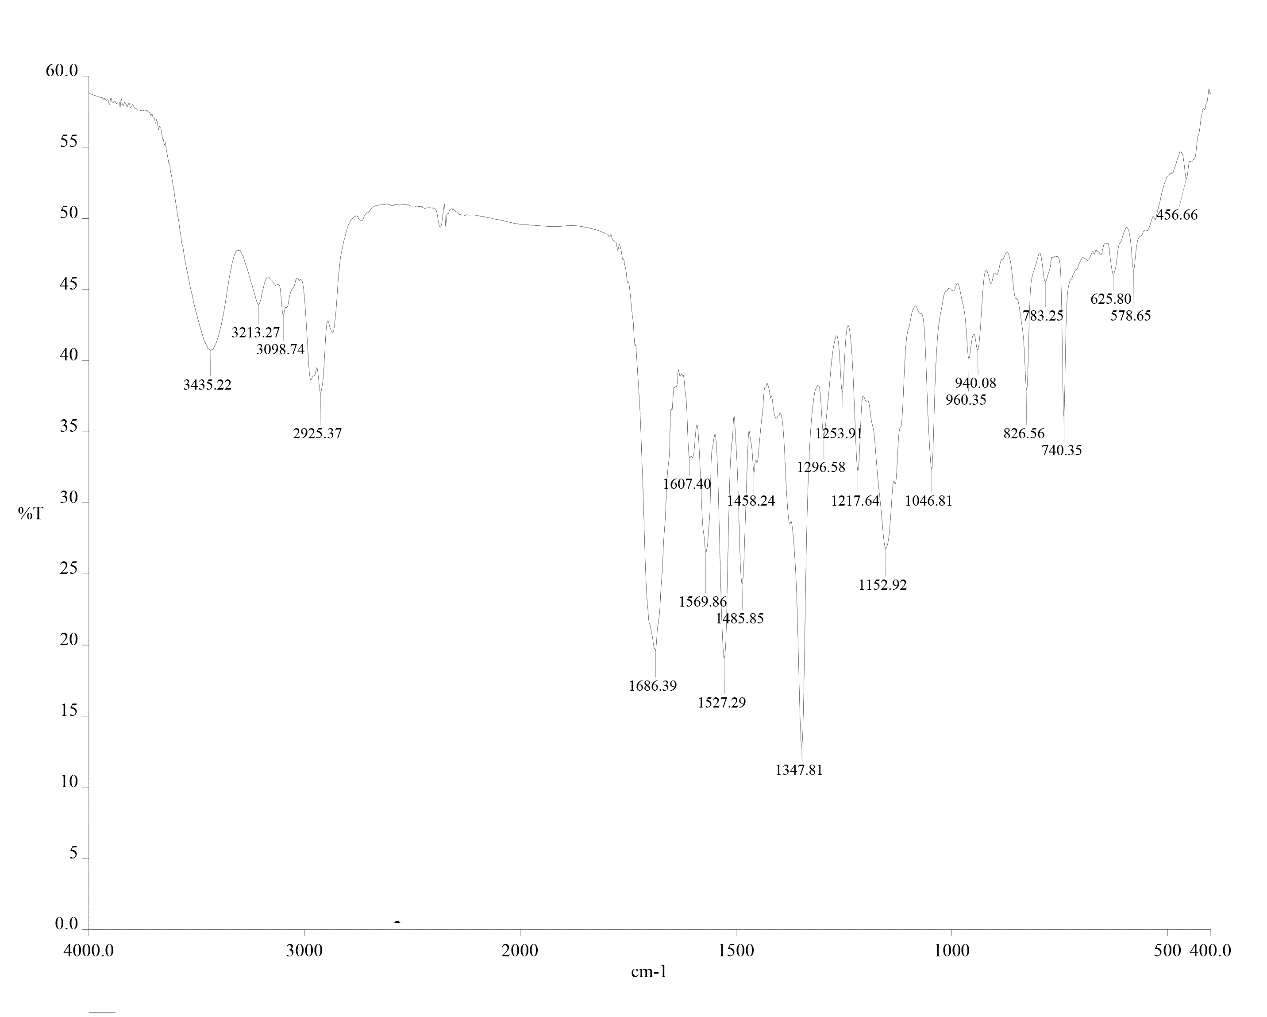


**Figure S**  55. IR of compound 6n


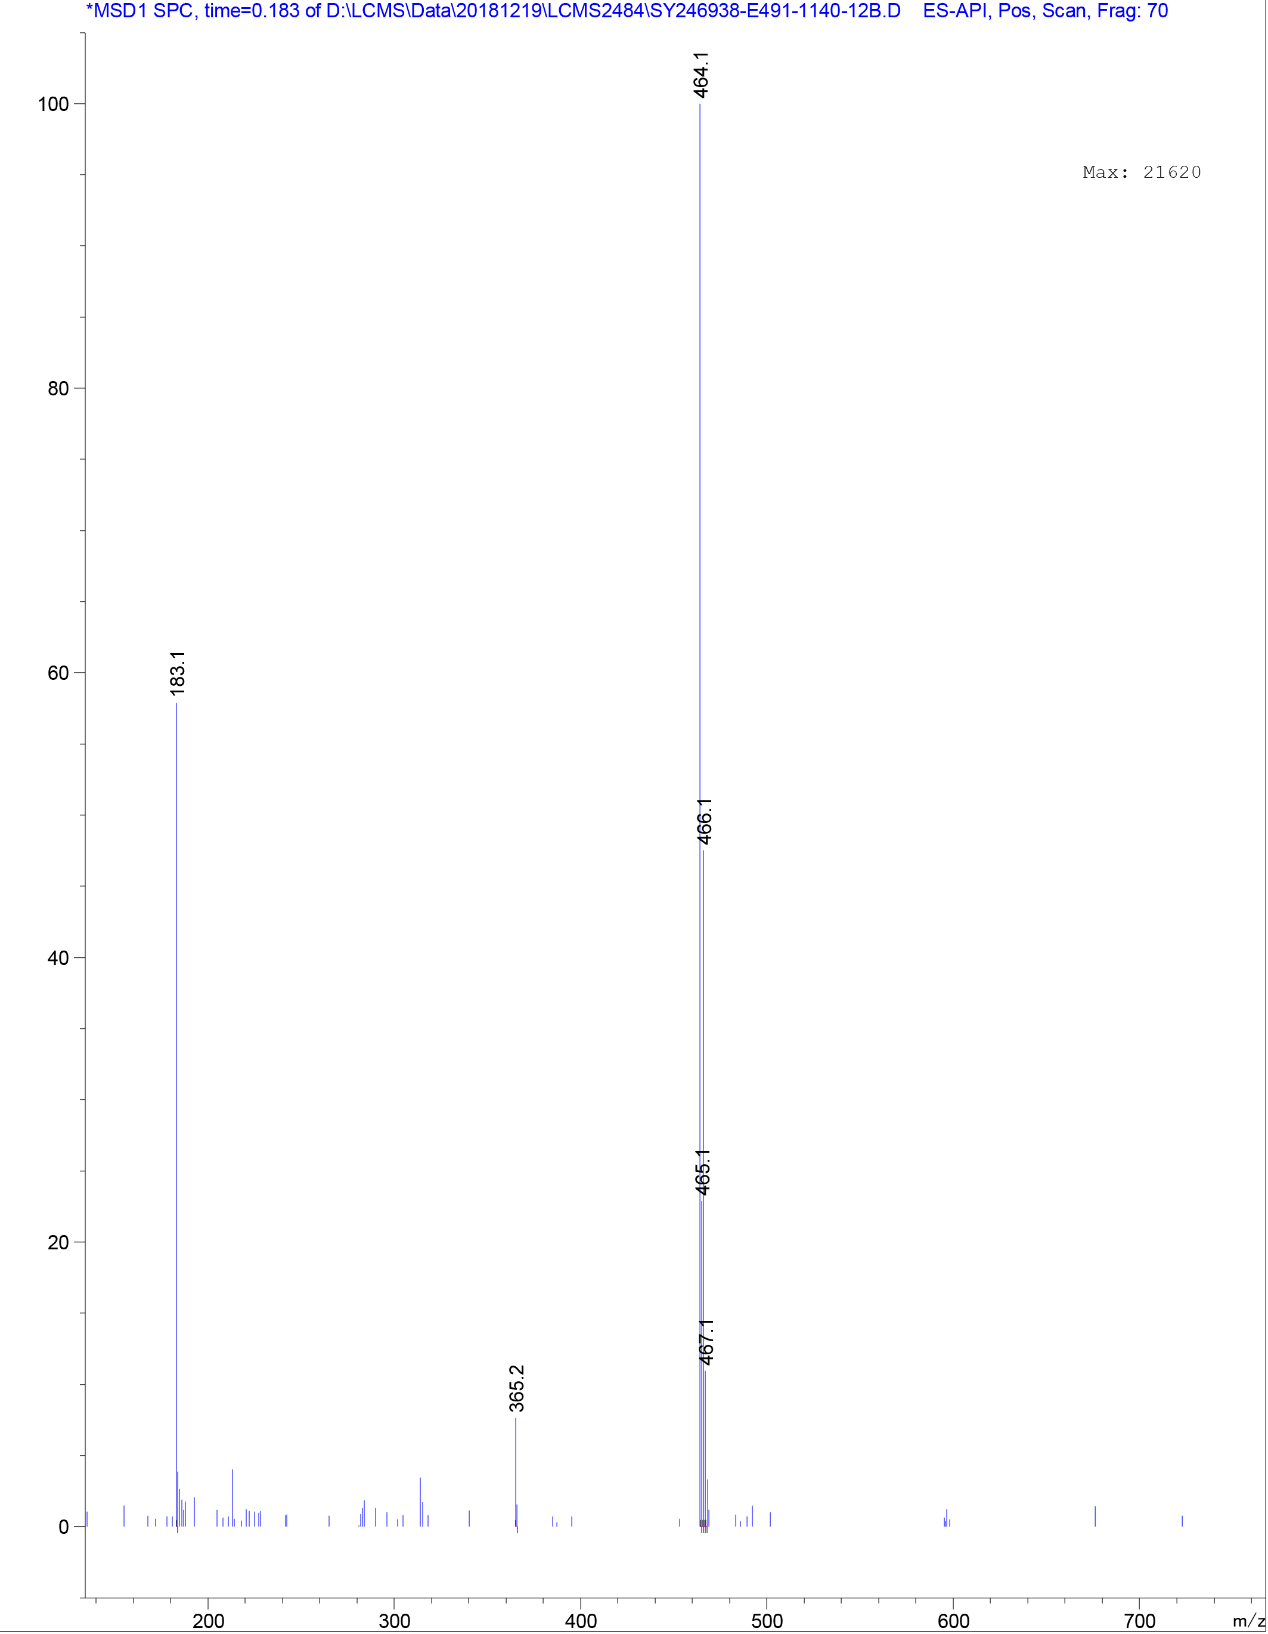


**Figure S**  56. ESI-MS of compound 6n


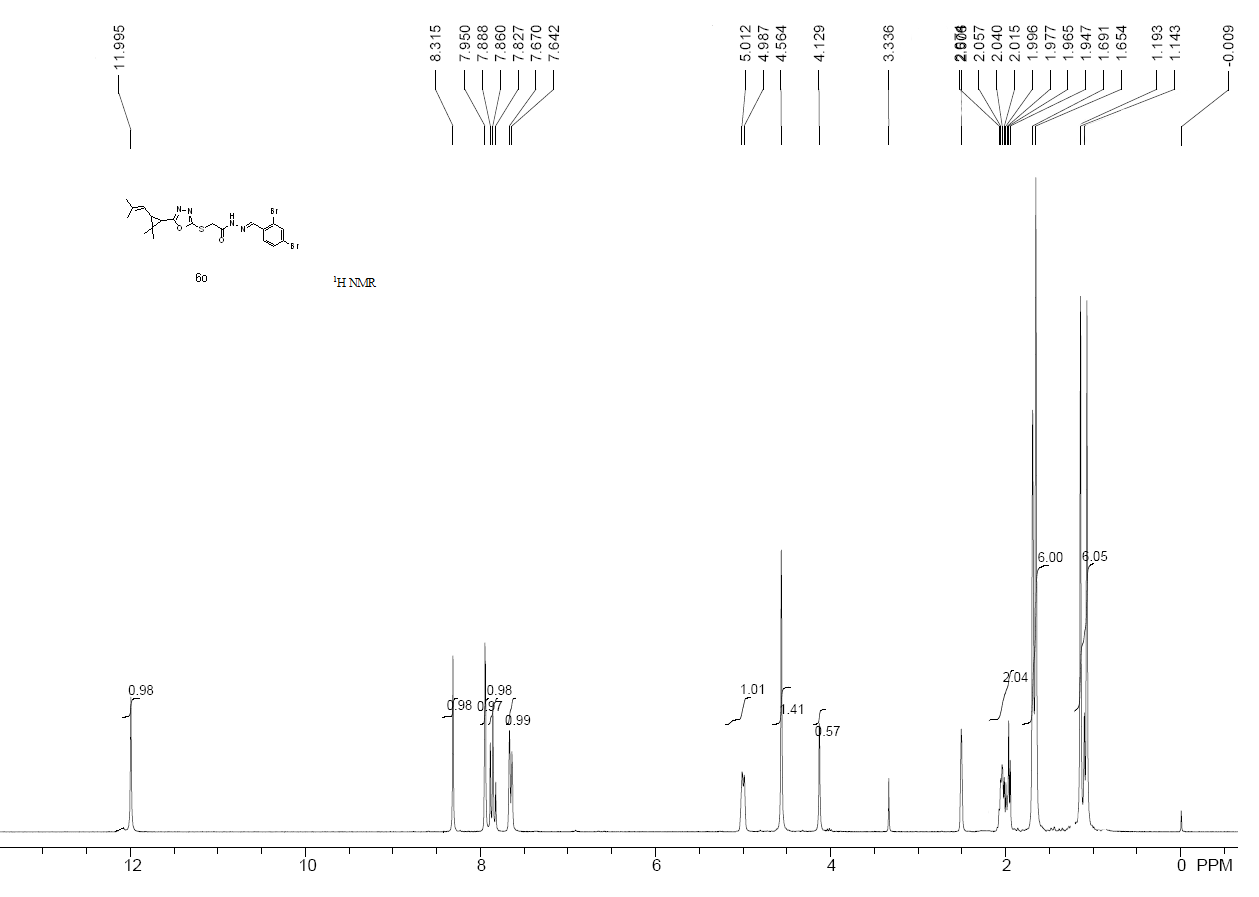


**Figure S**  57. 1H NMR of compound 6o


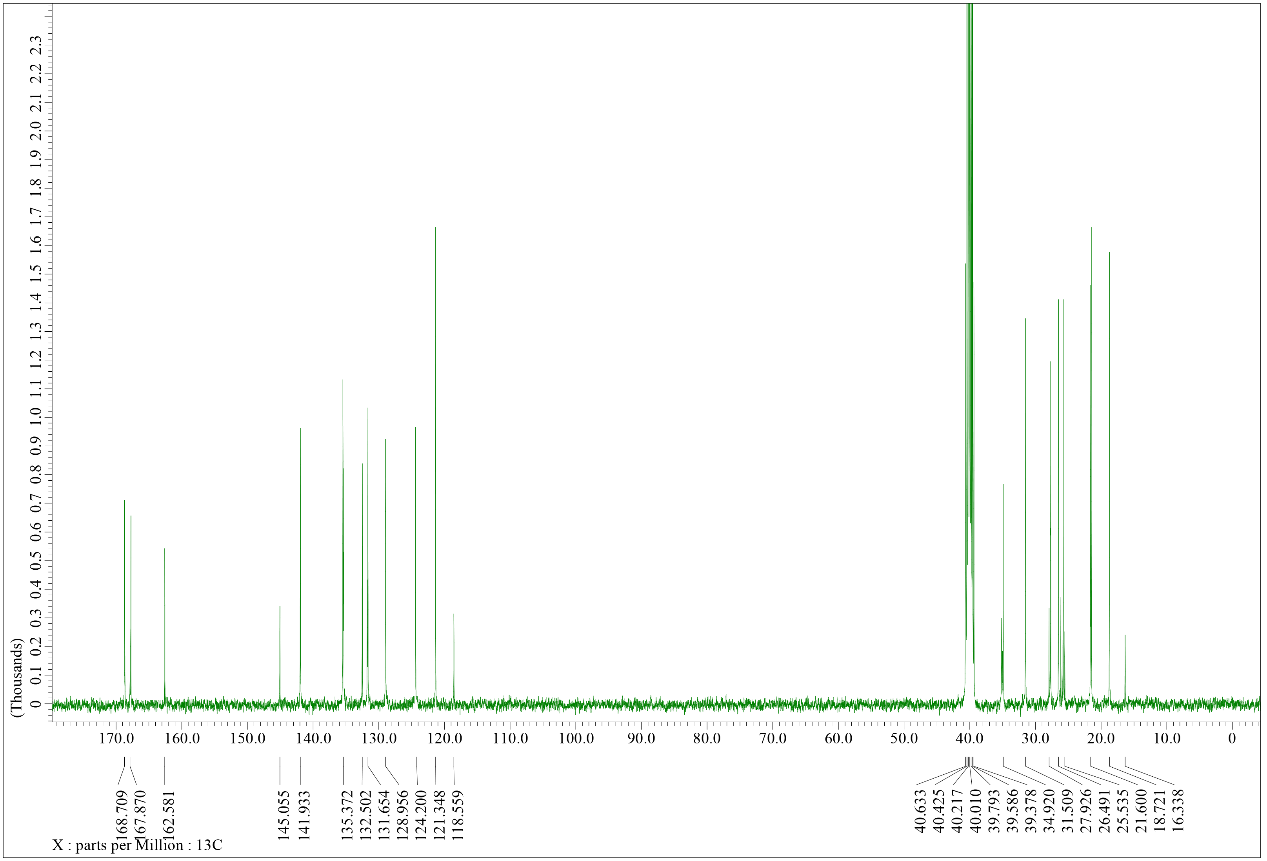


**Figure S**  58. 13C NMR of compound 6o


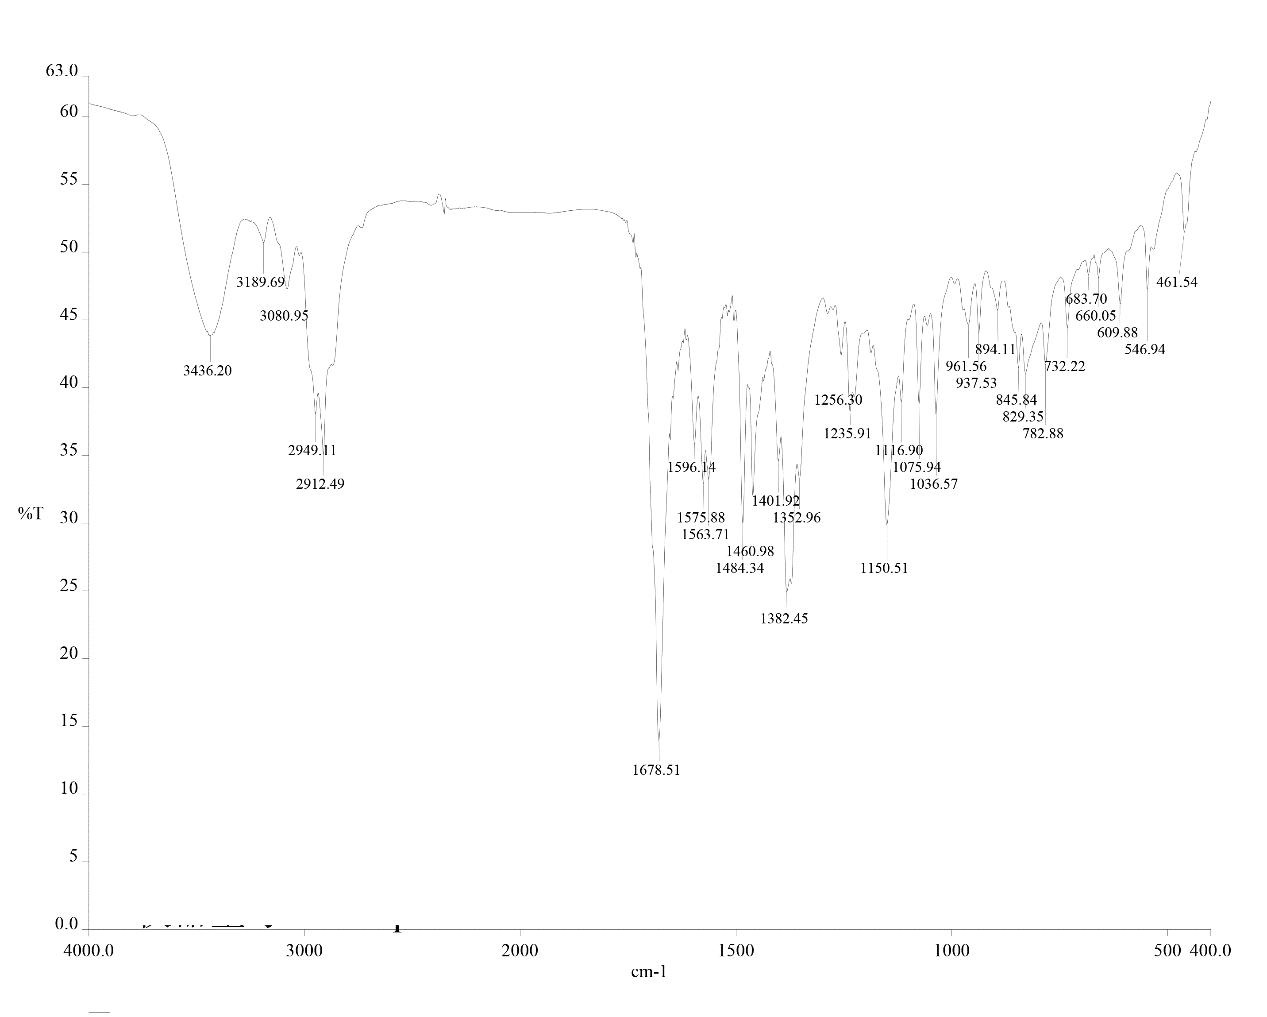


**Figure S**  59. IR of compound 6o


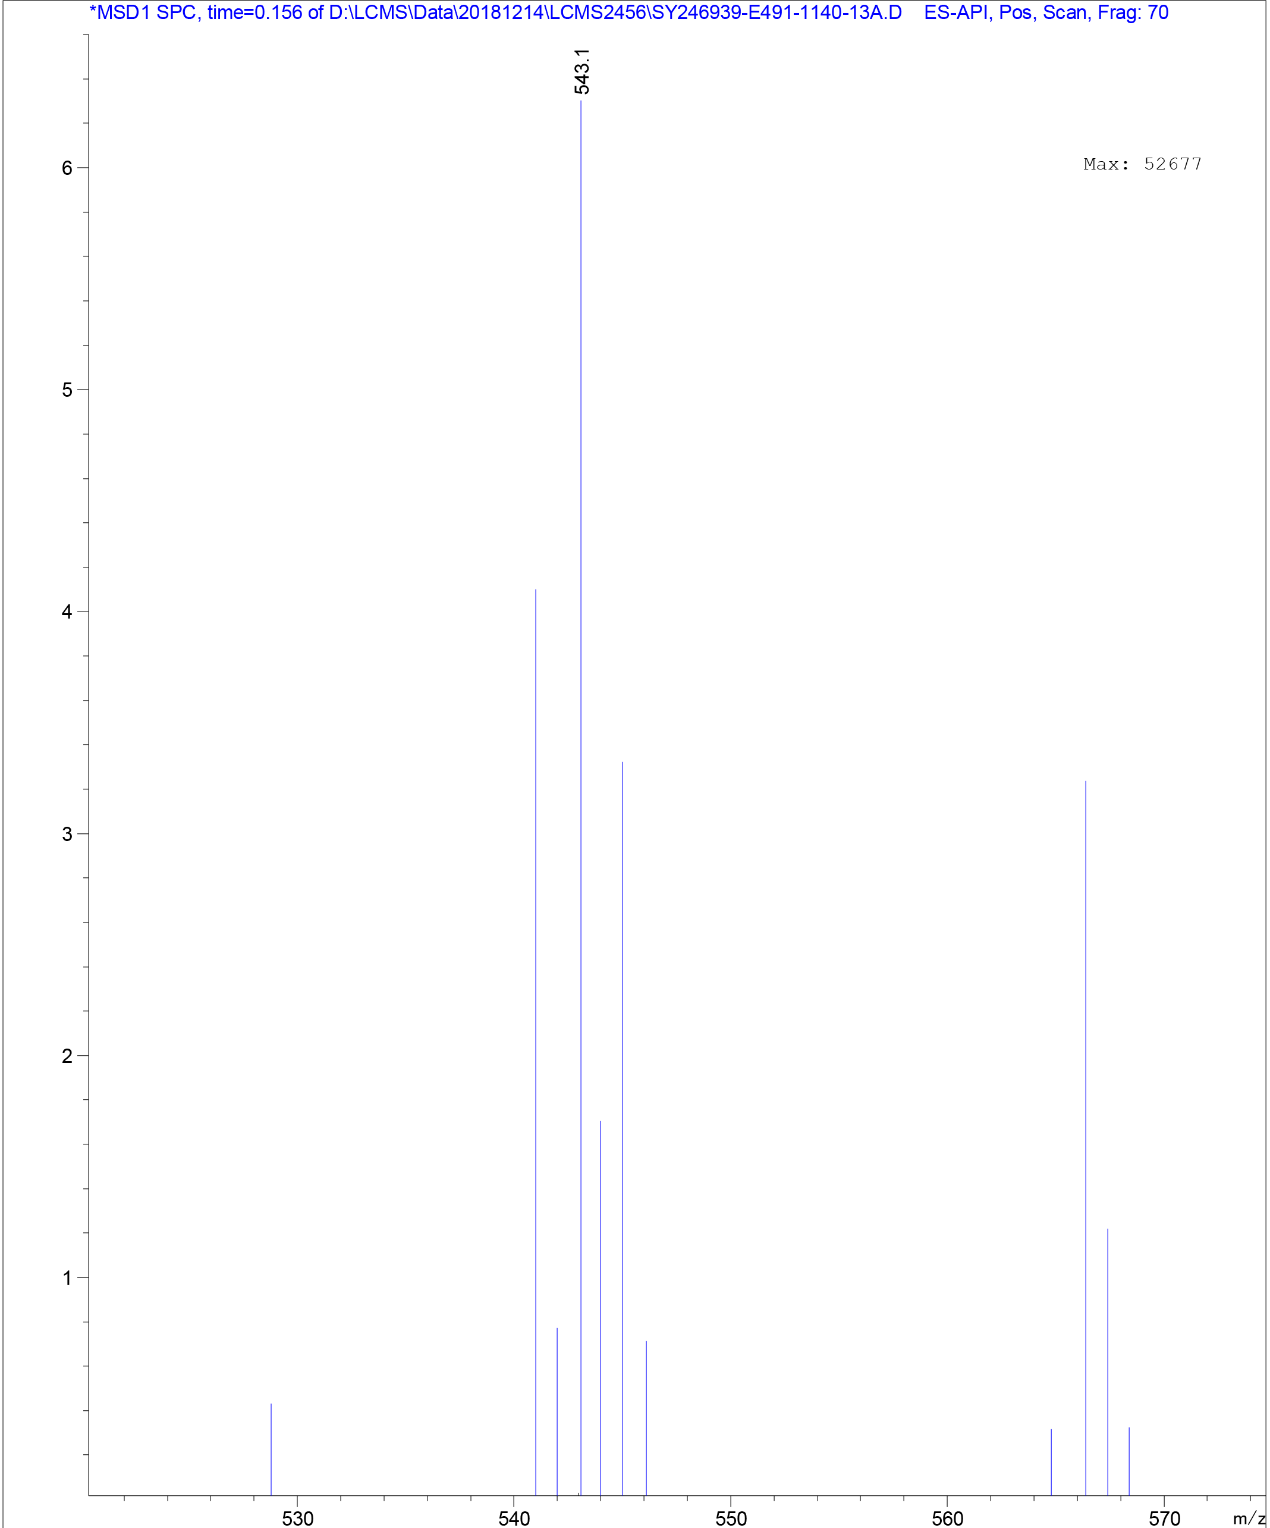


**Figure S**  60. ESI-MS of compound 6o


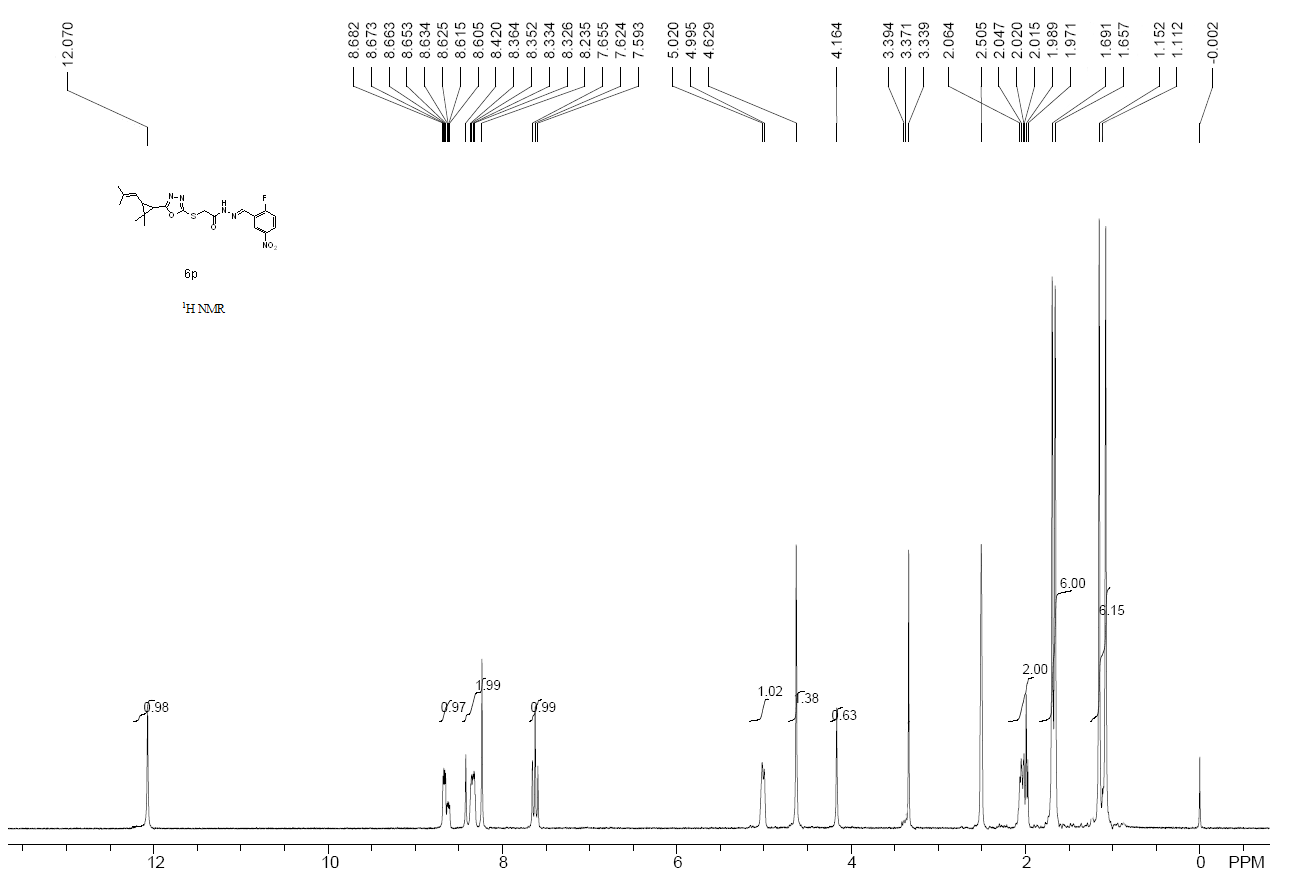


**Figure S**  61. 1H NMR of compound 6p


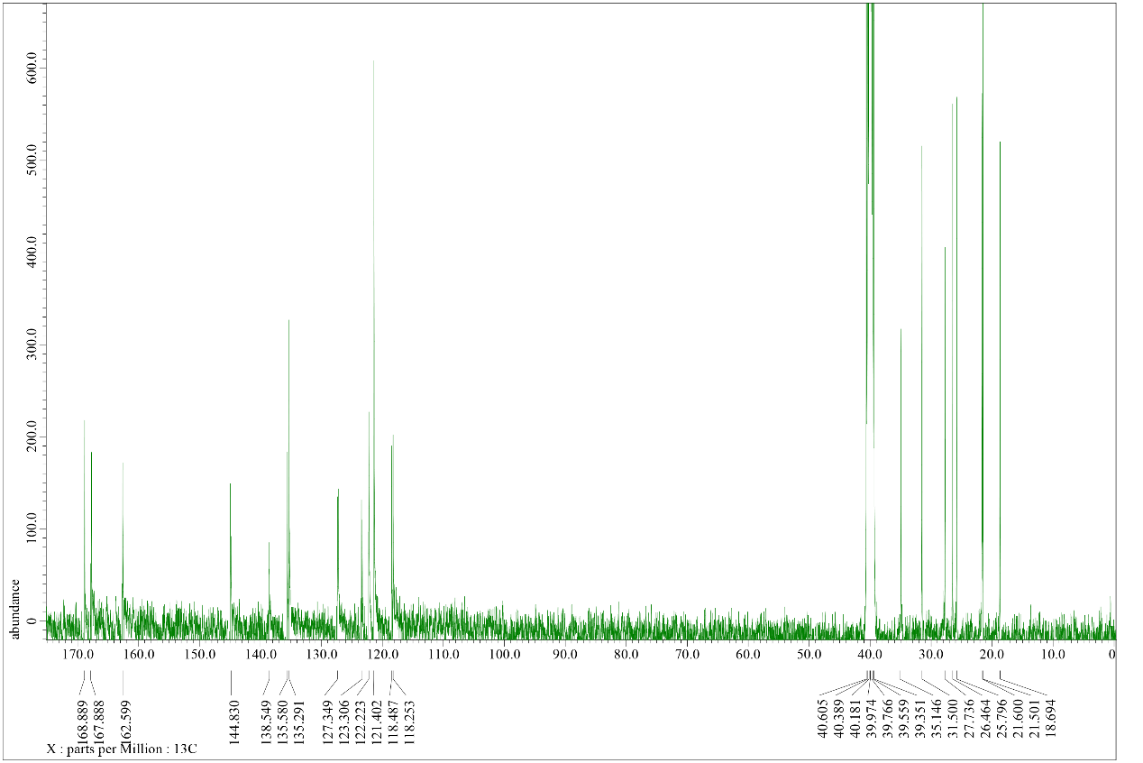


**Figure S**  62.13C NMR of compound 6p


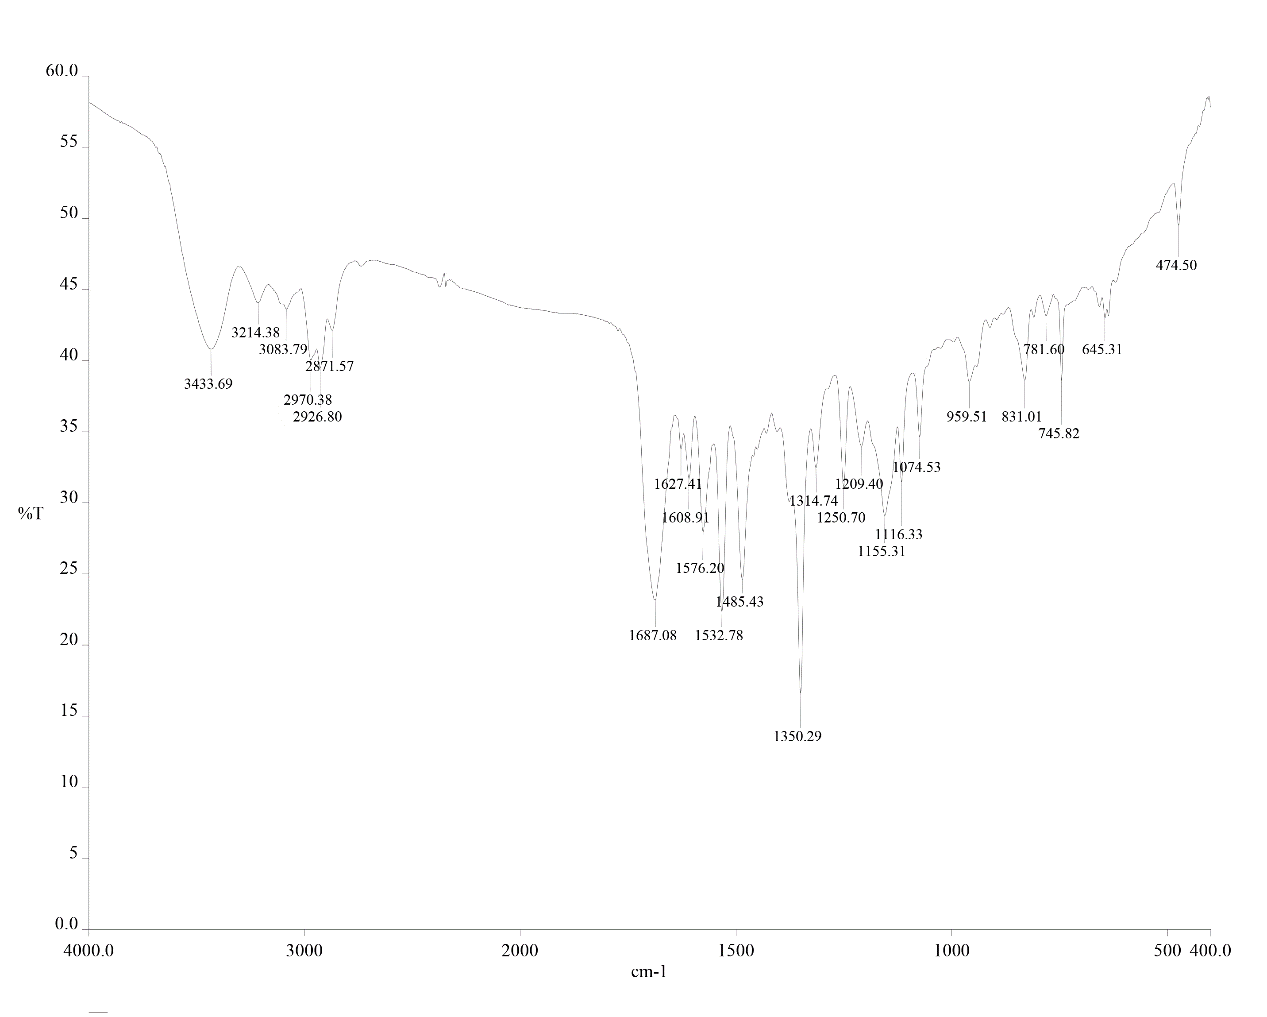


**Figure S**  63. IR of compound 6p


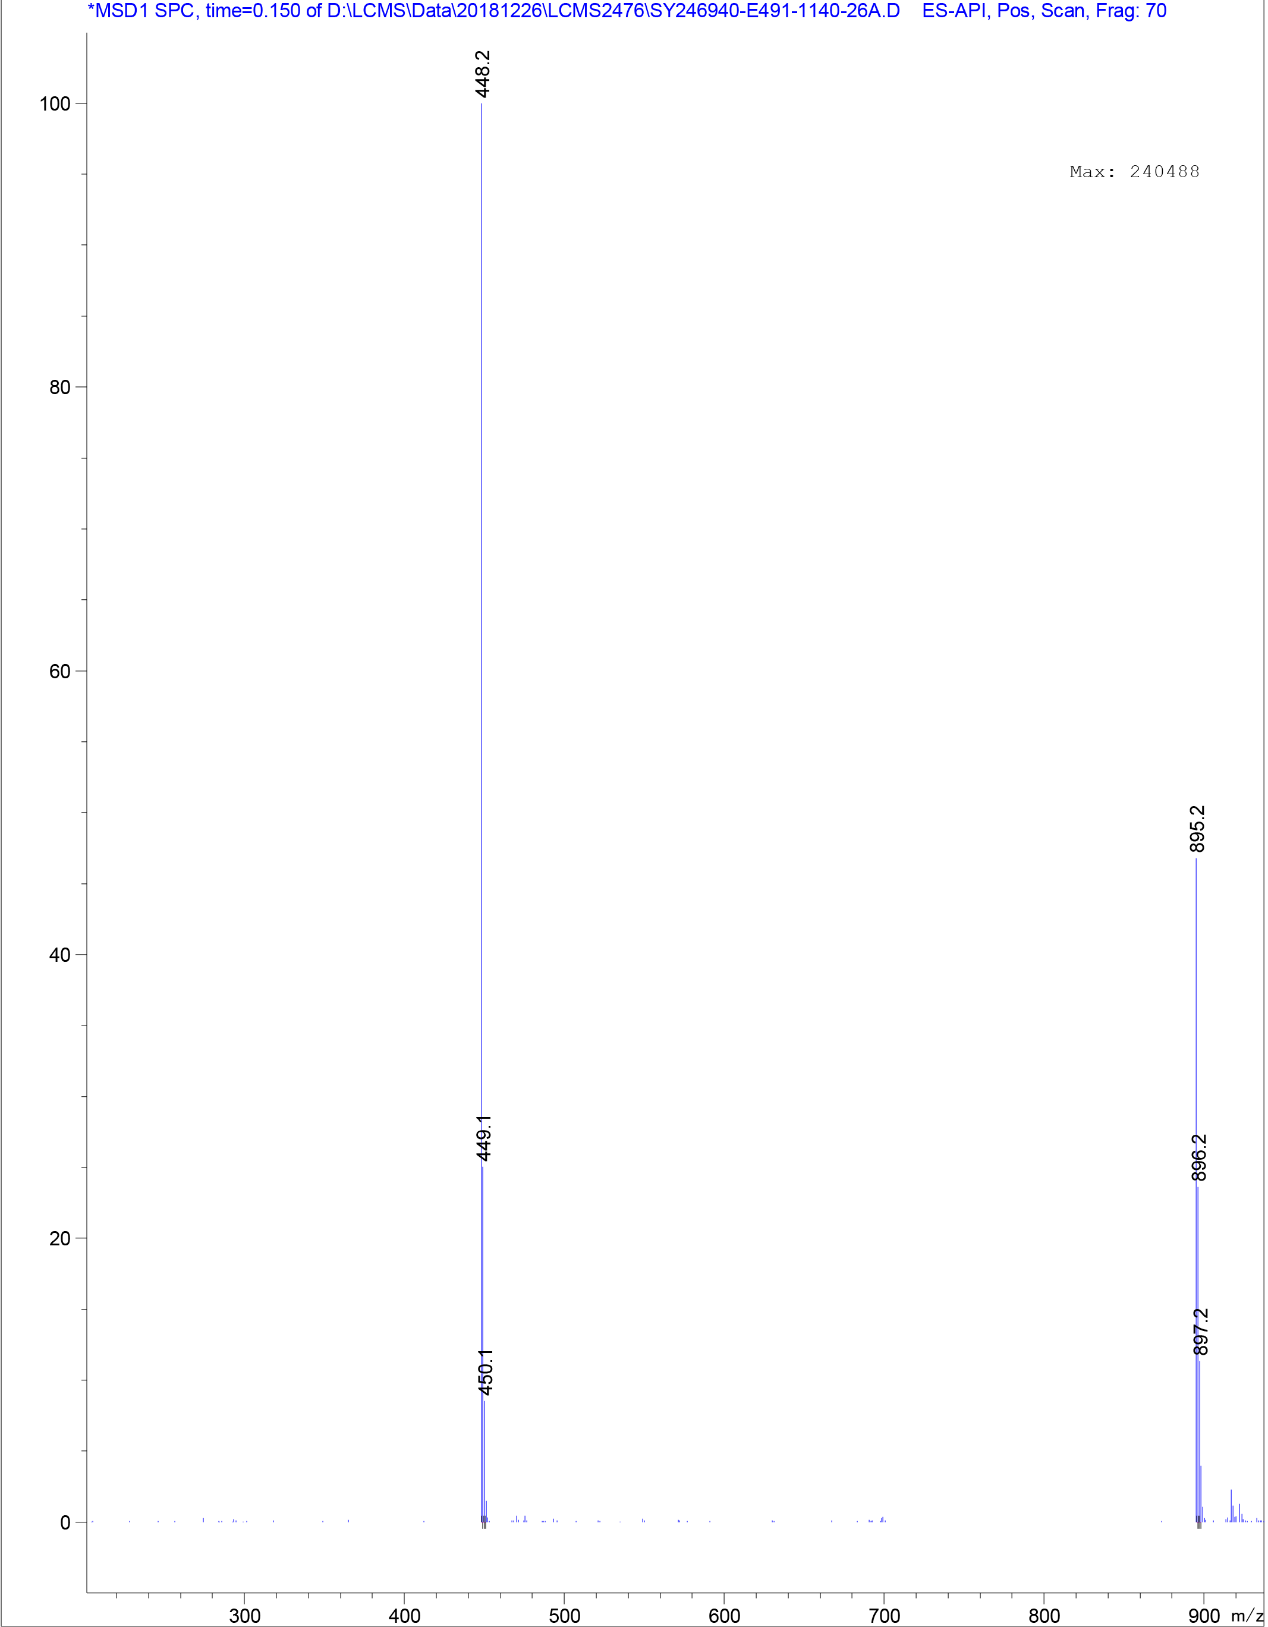


**Figure S**  64. ESI-MS of compound 6p


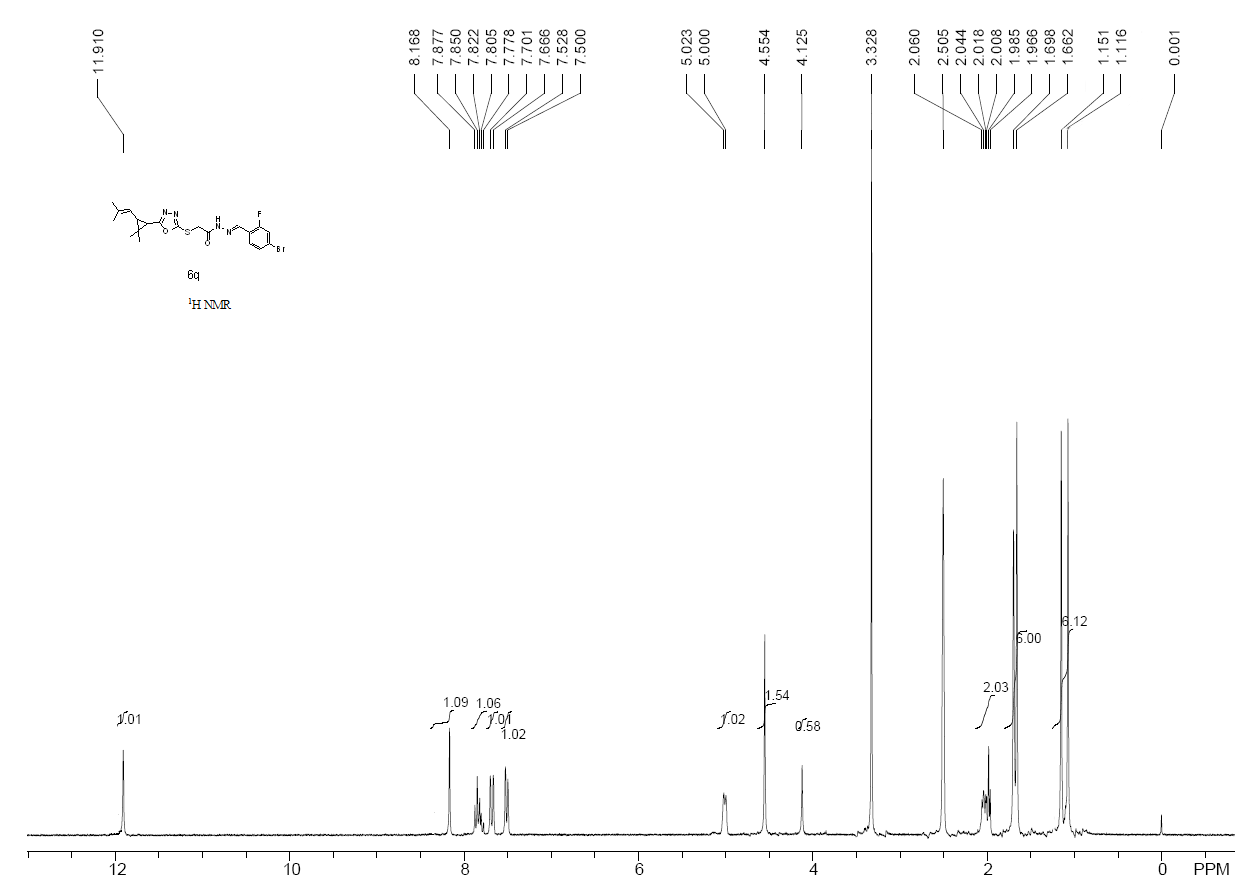


**Figure S**  65. 1H NMR of compound 6q


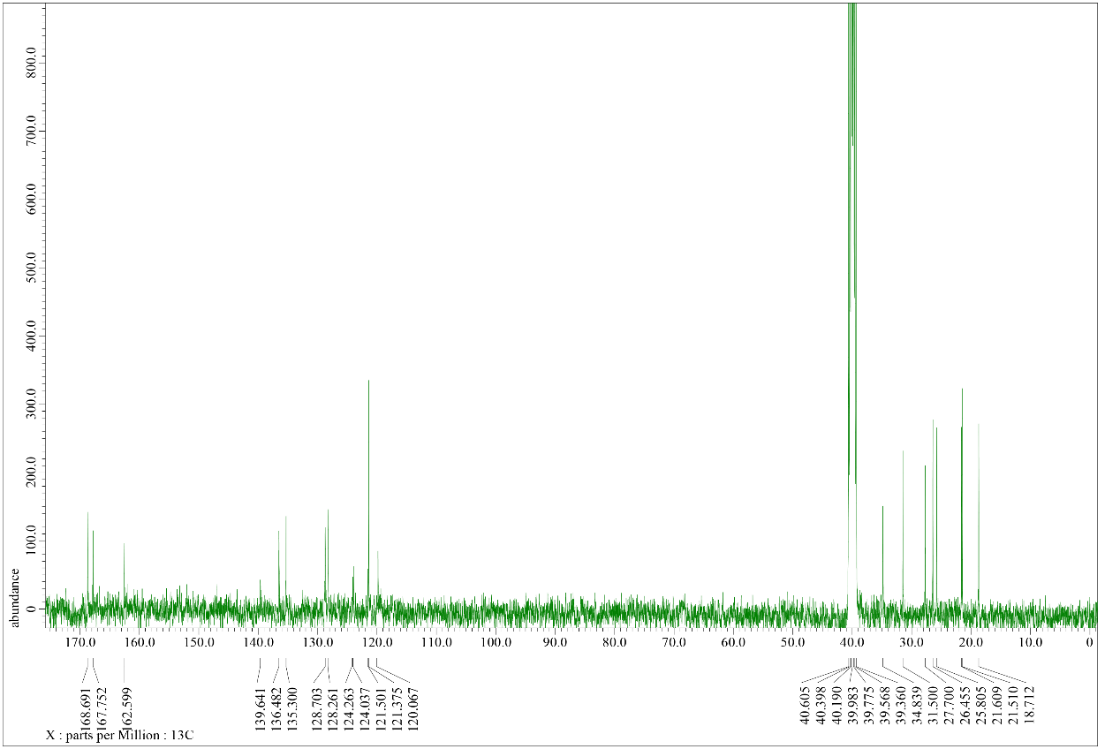


**Figure S**  66. 13C NMR of compound 6q


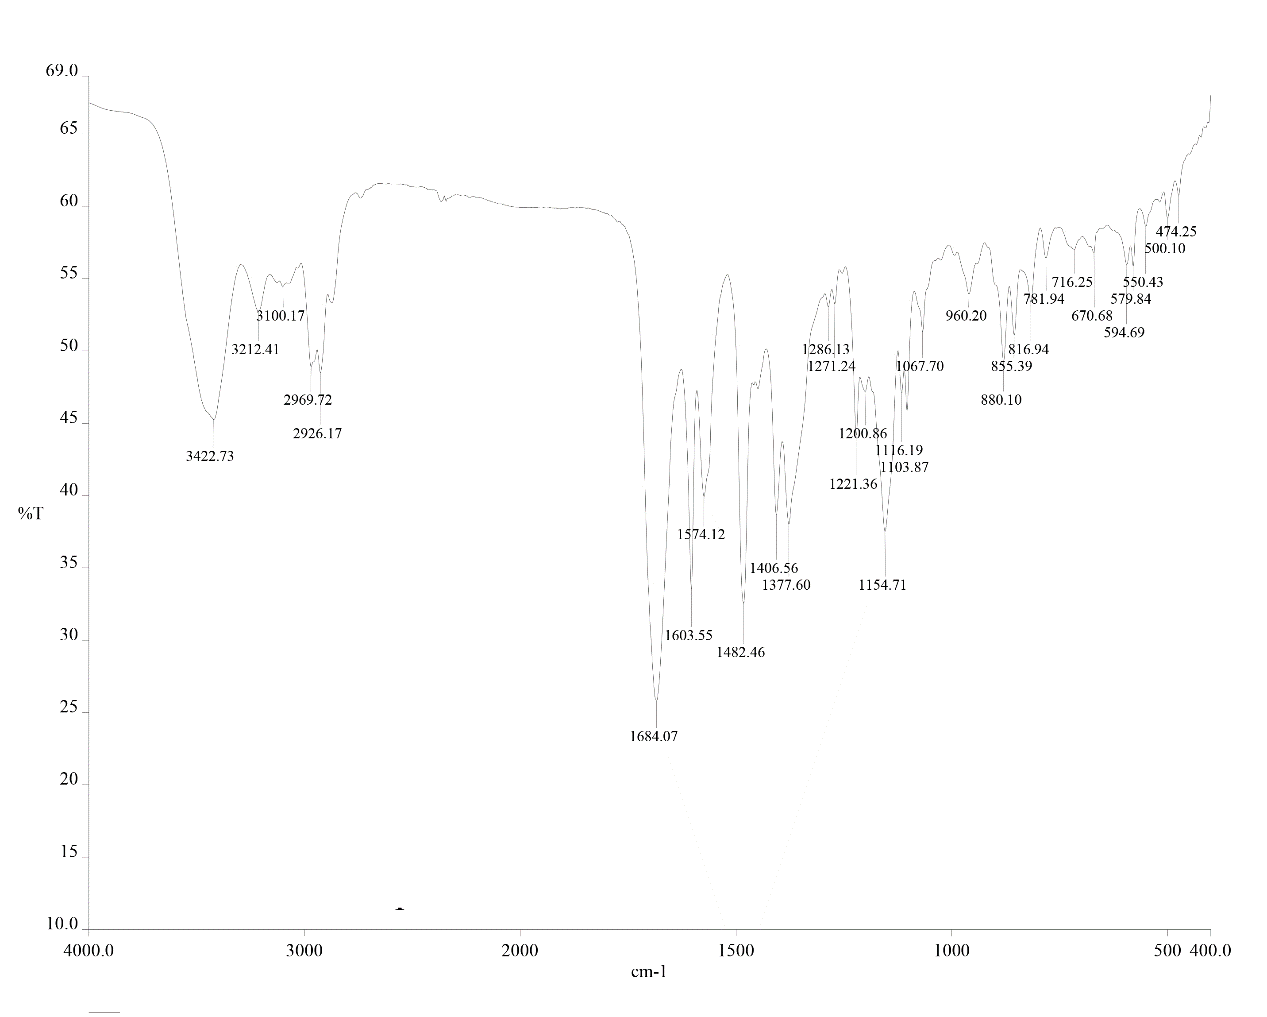


**Figure S**  67. IR of compound 6q


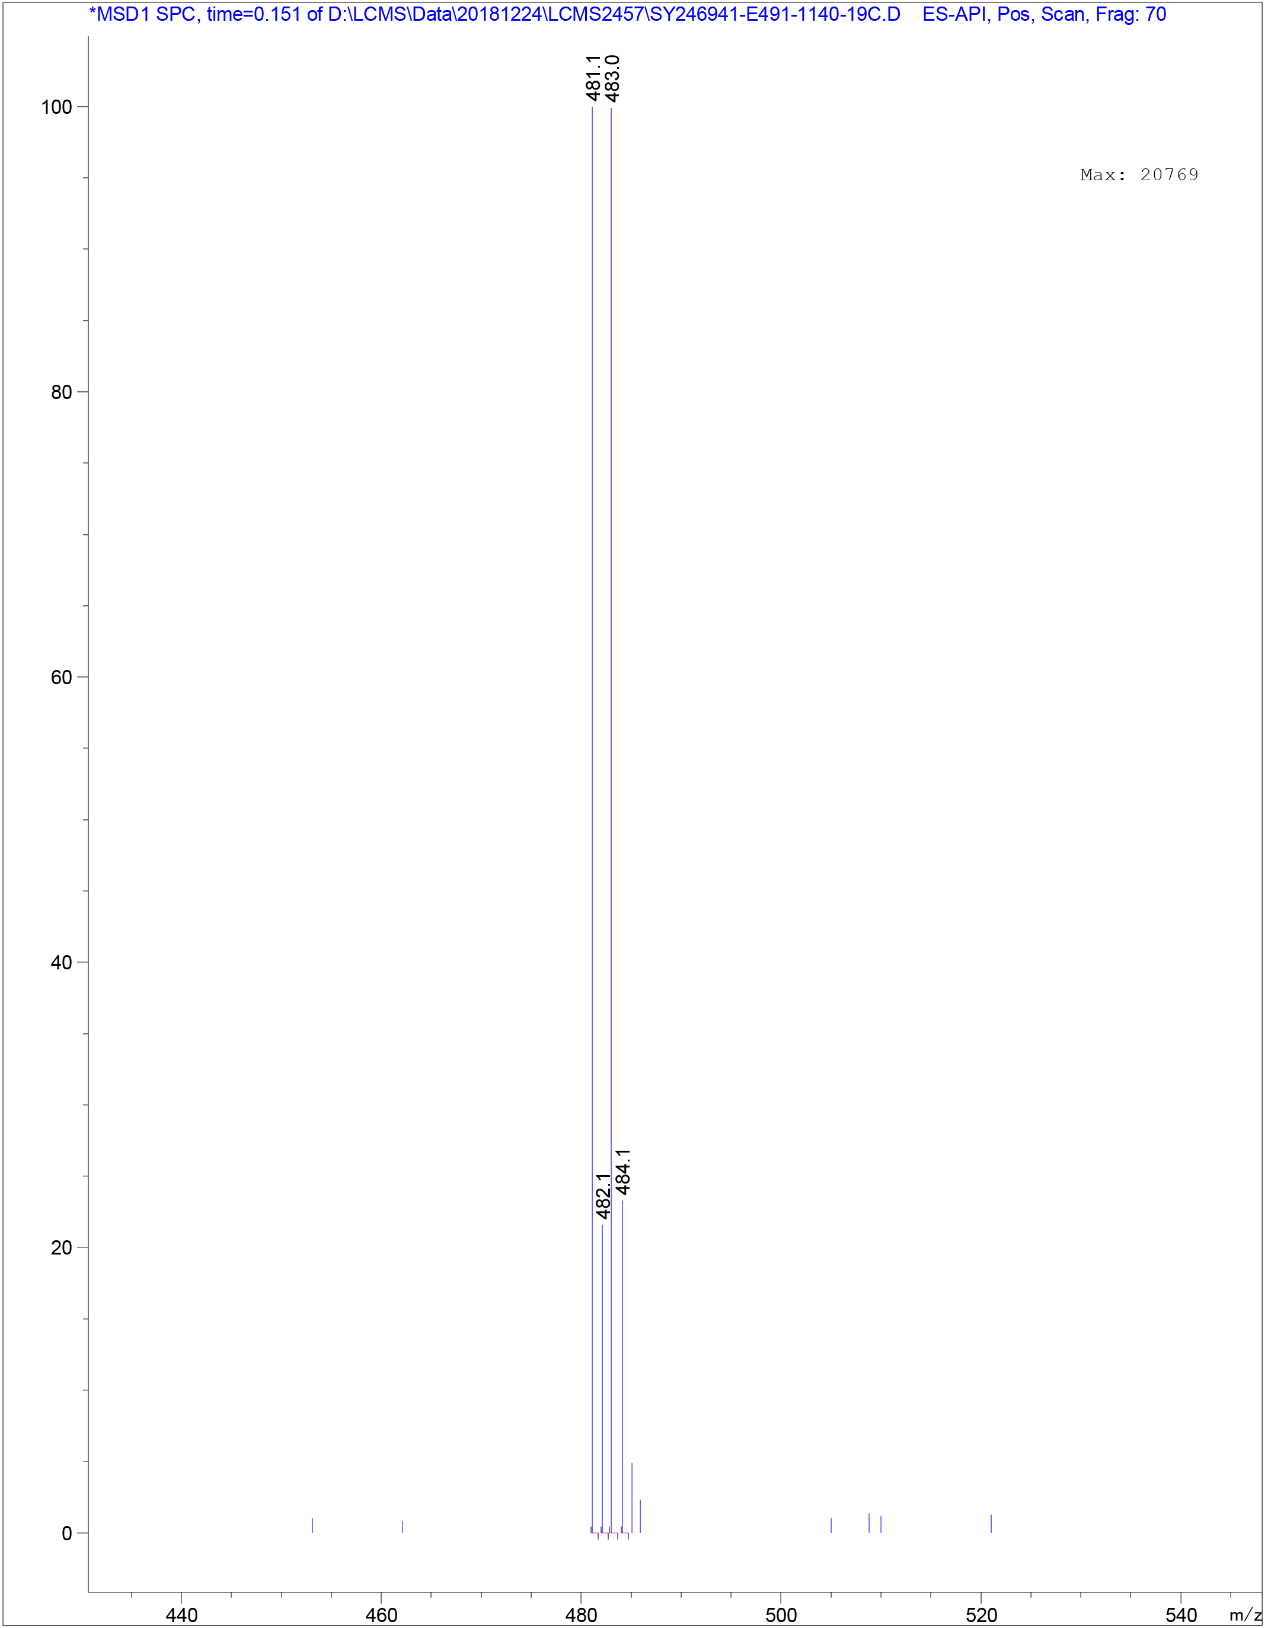


**Figure S**  68. ESI-MS of compound 6q


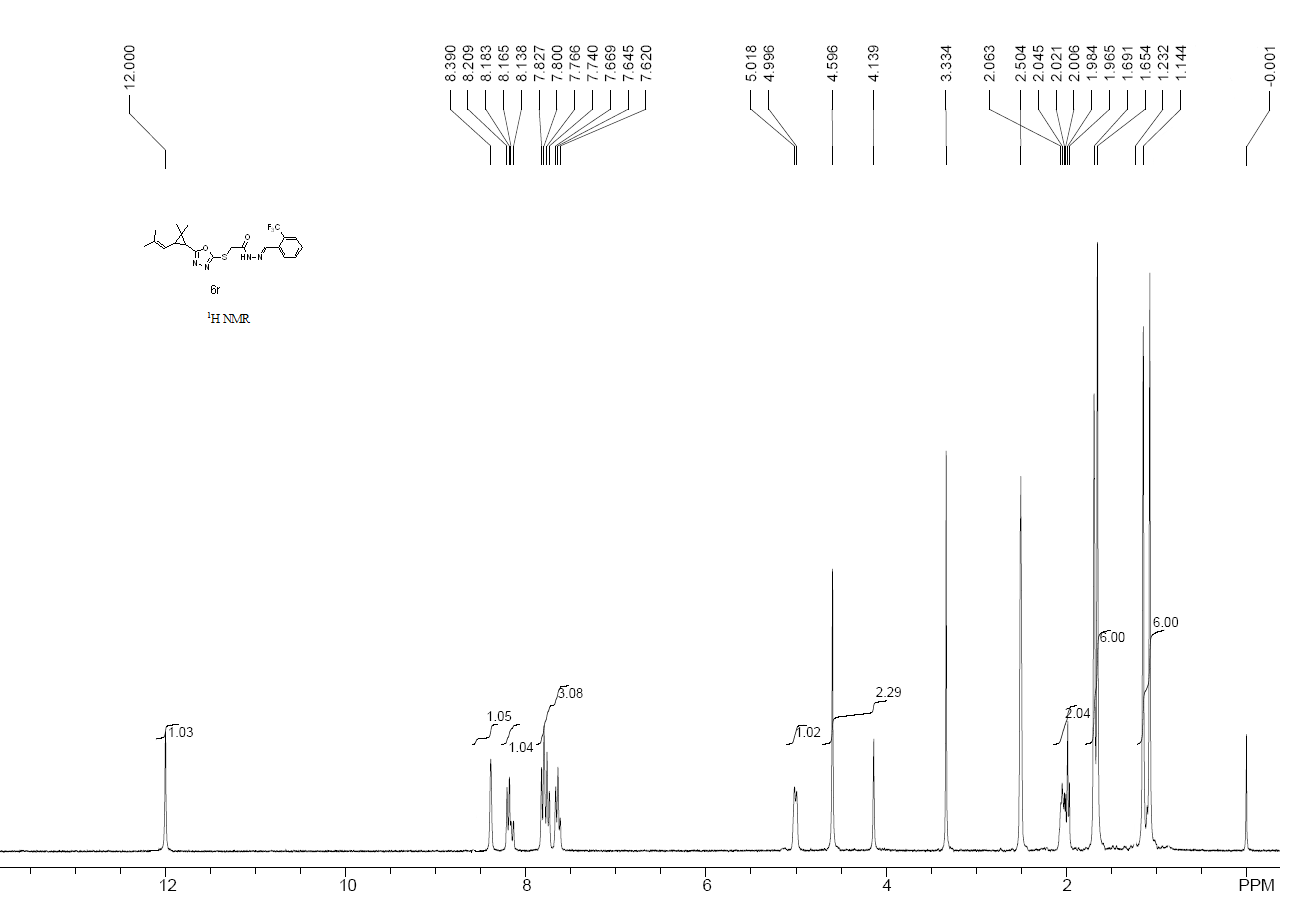


**Figure S**  69. 1H NMR of compound 6r


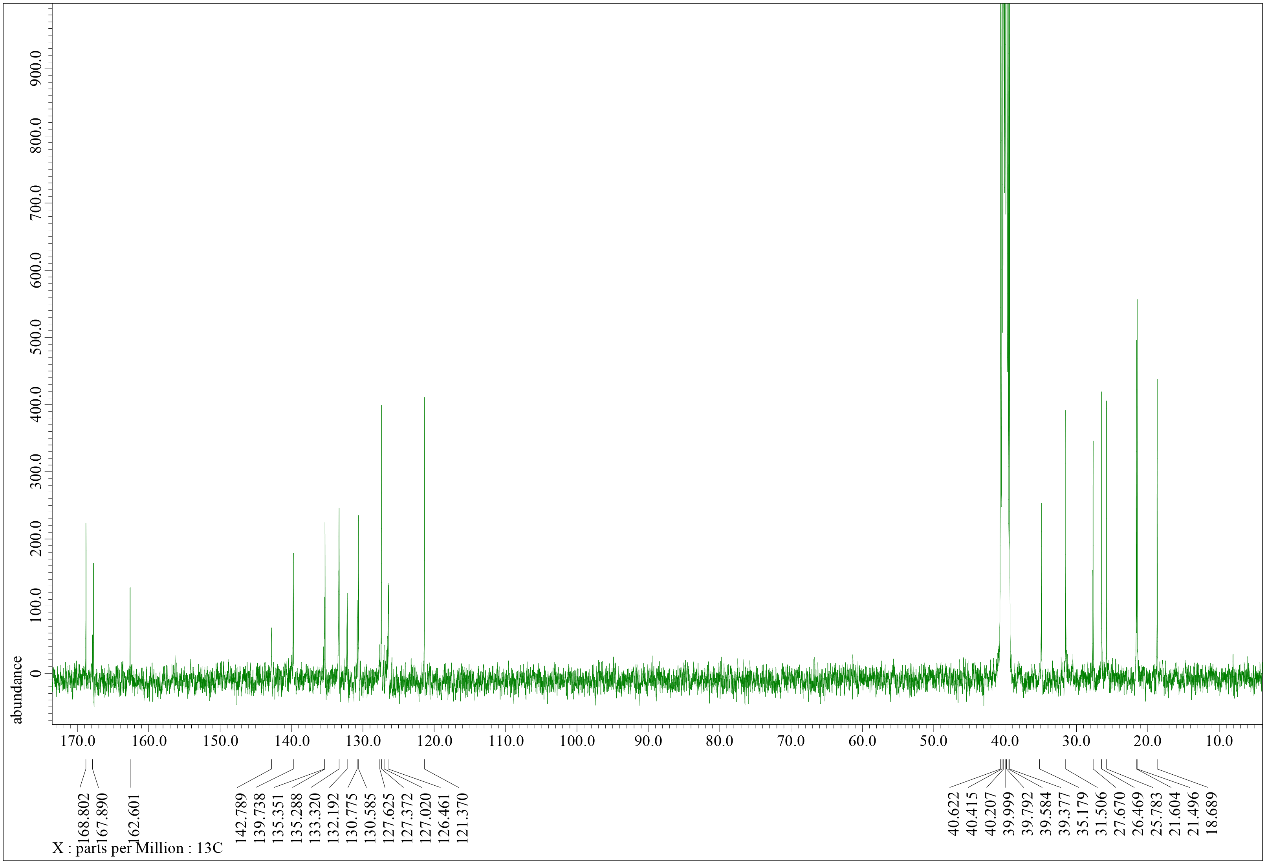


**Figure S**  70. 13C NMR of compound 6r


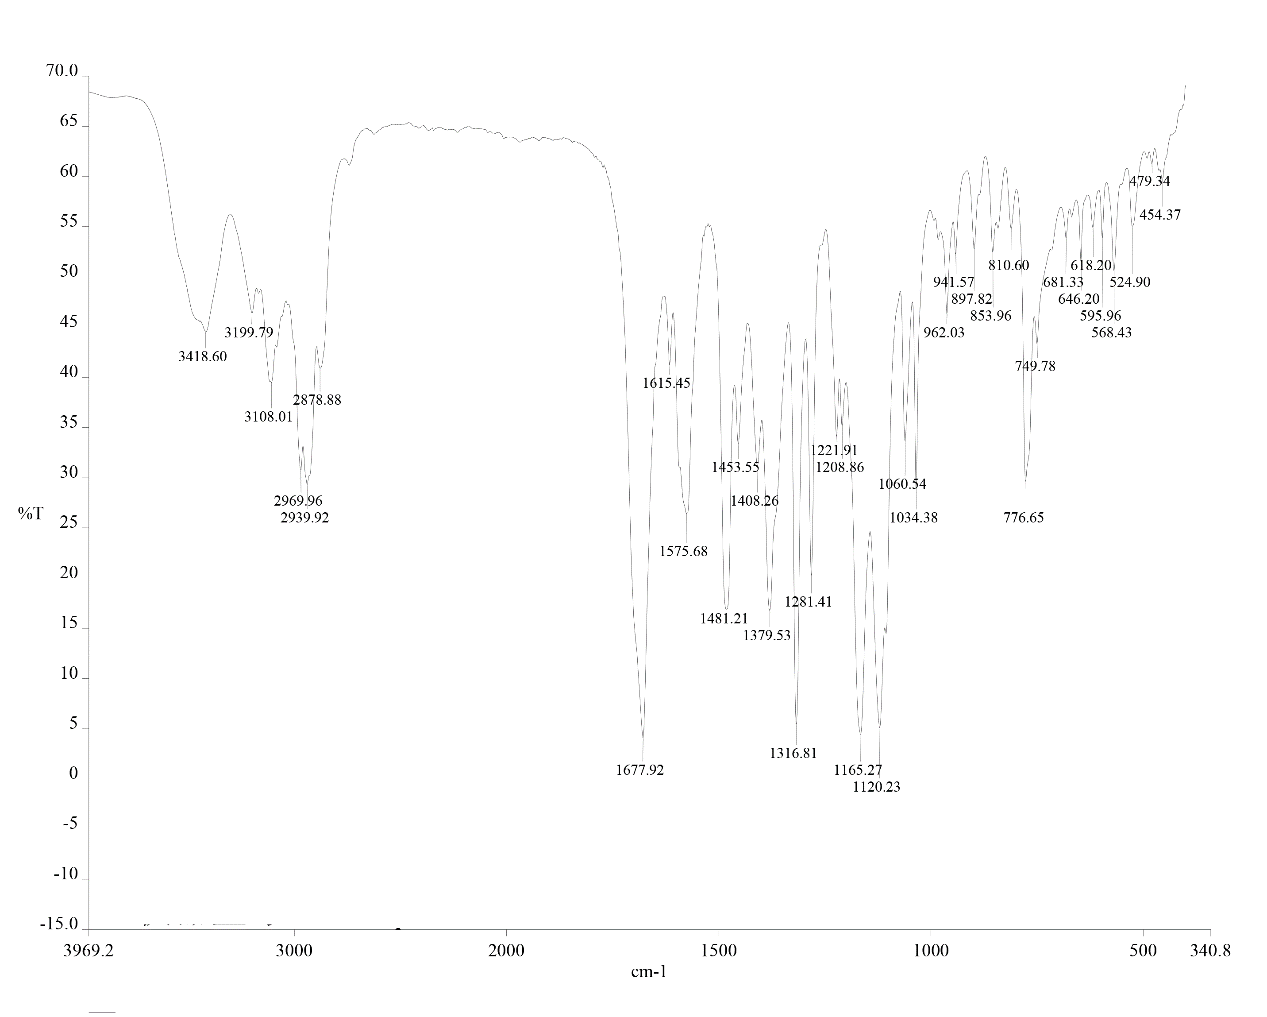


**Figure S**  71. IR of compound 6r


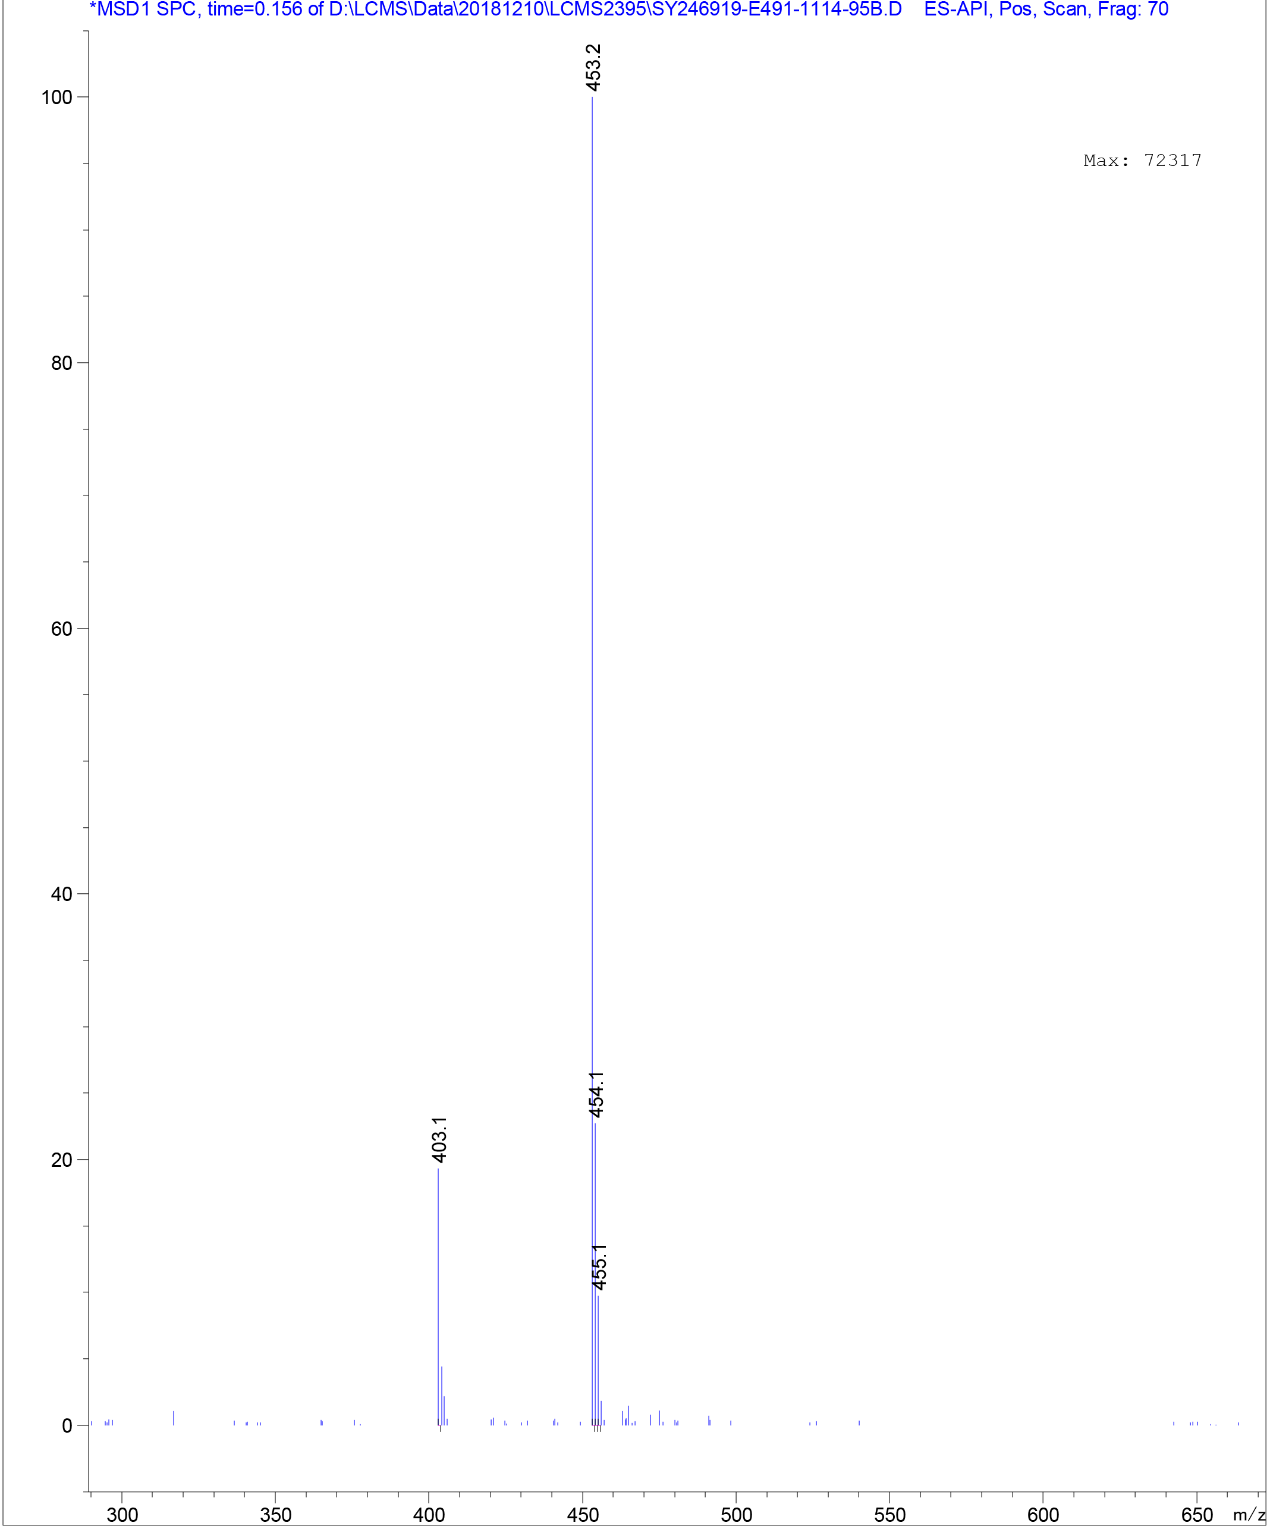


**Figure S**  72. ESI-MS of compound 6r


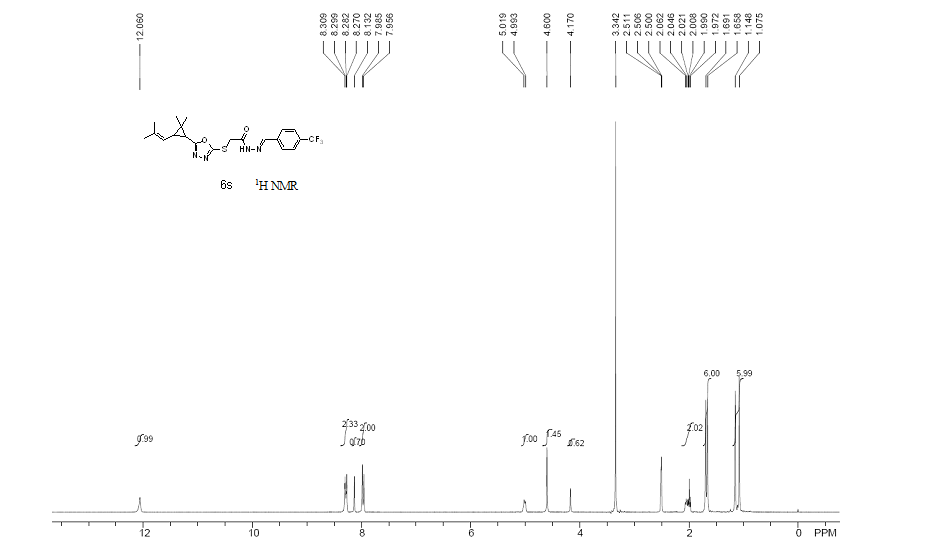


**Figure S**  73. 1H NMR of compound 6s


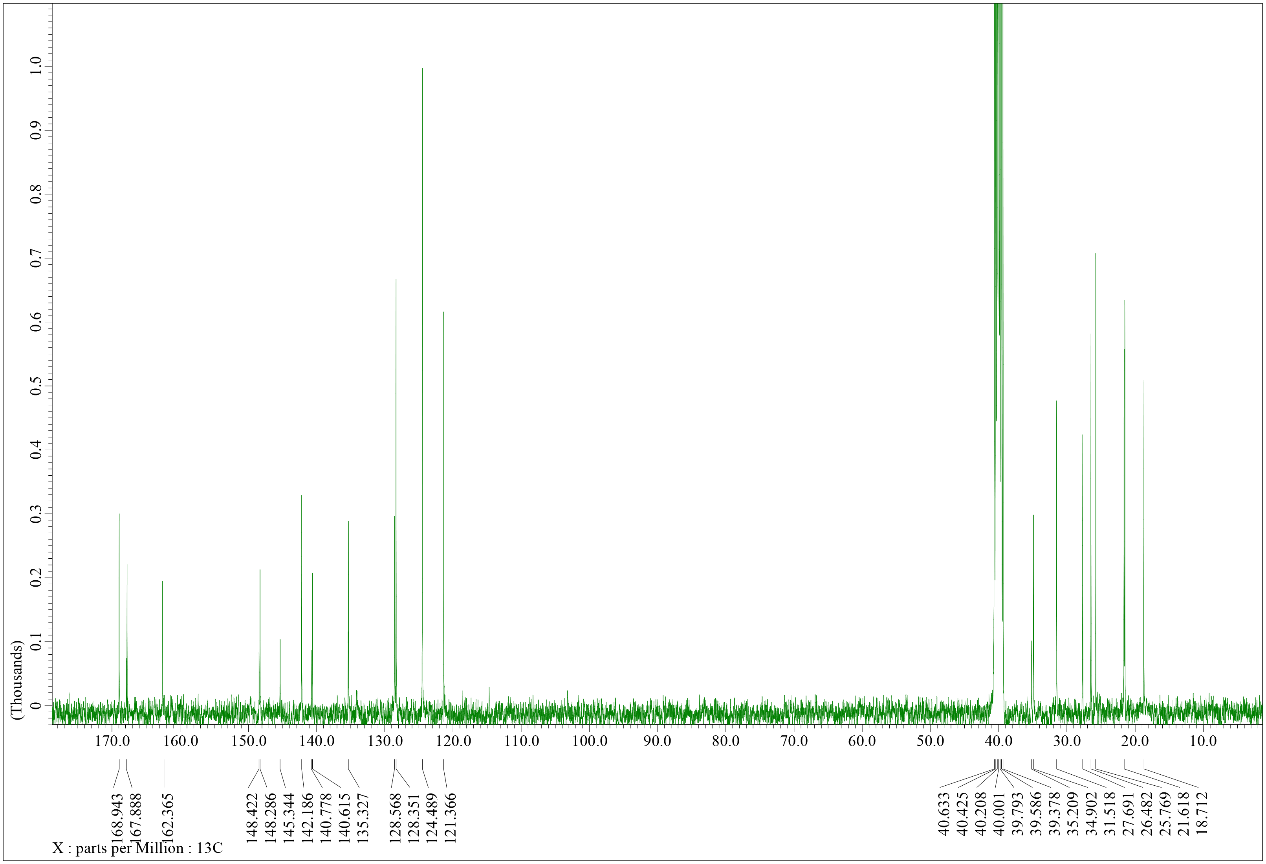


**Figure S**  74. 13C NMR of compound 6s


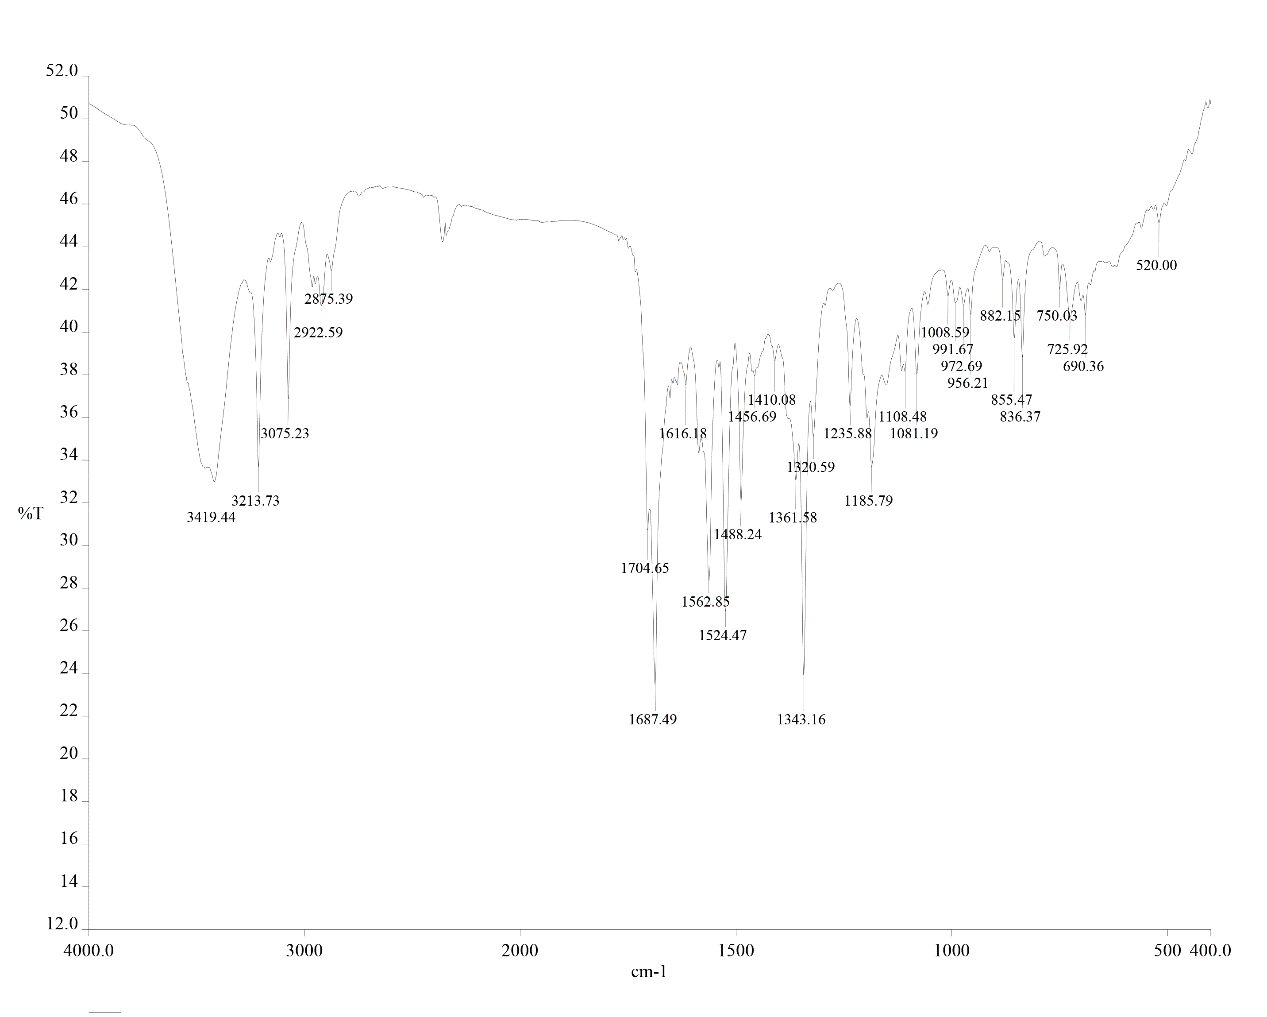


**Figure S**  75. IR of compound 6s


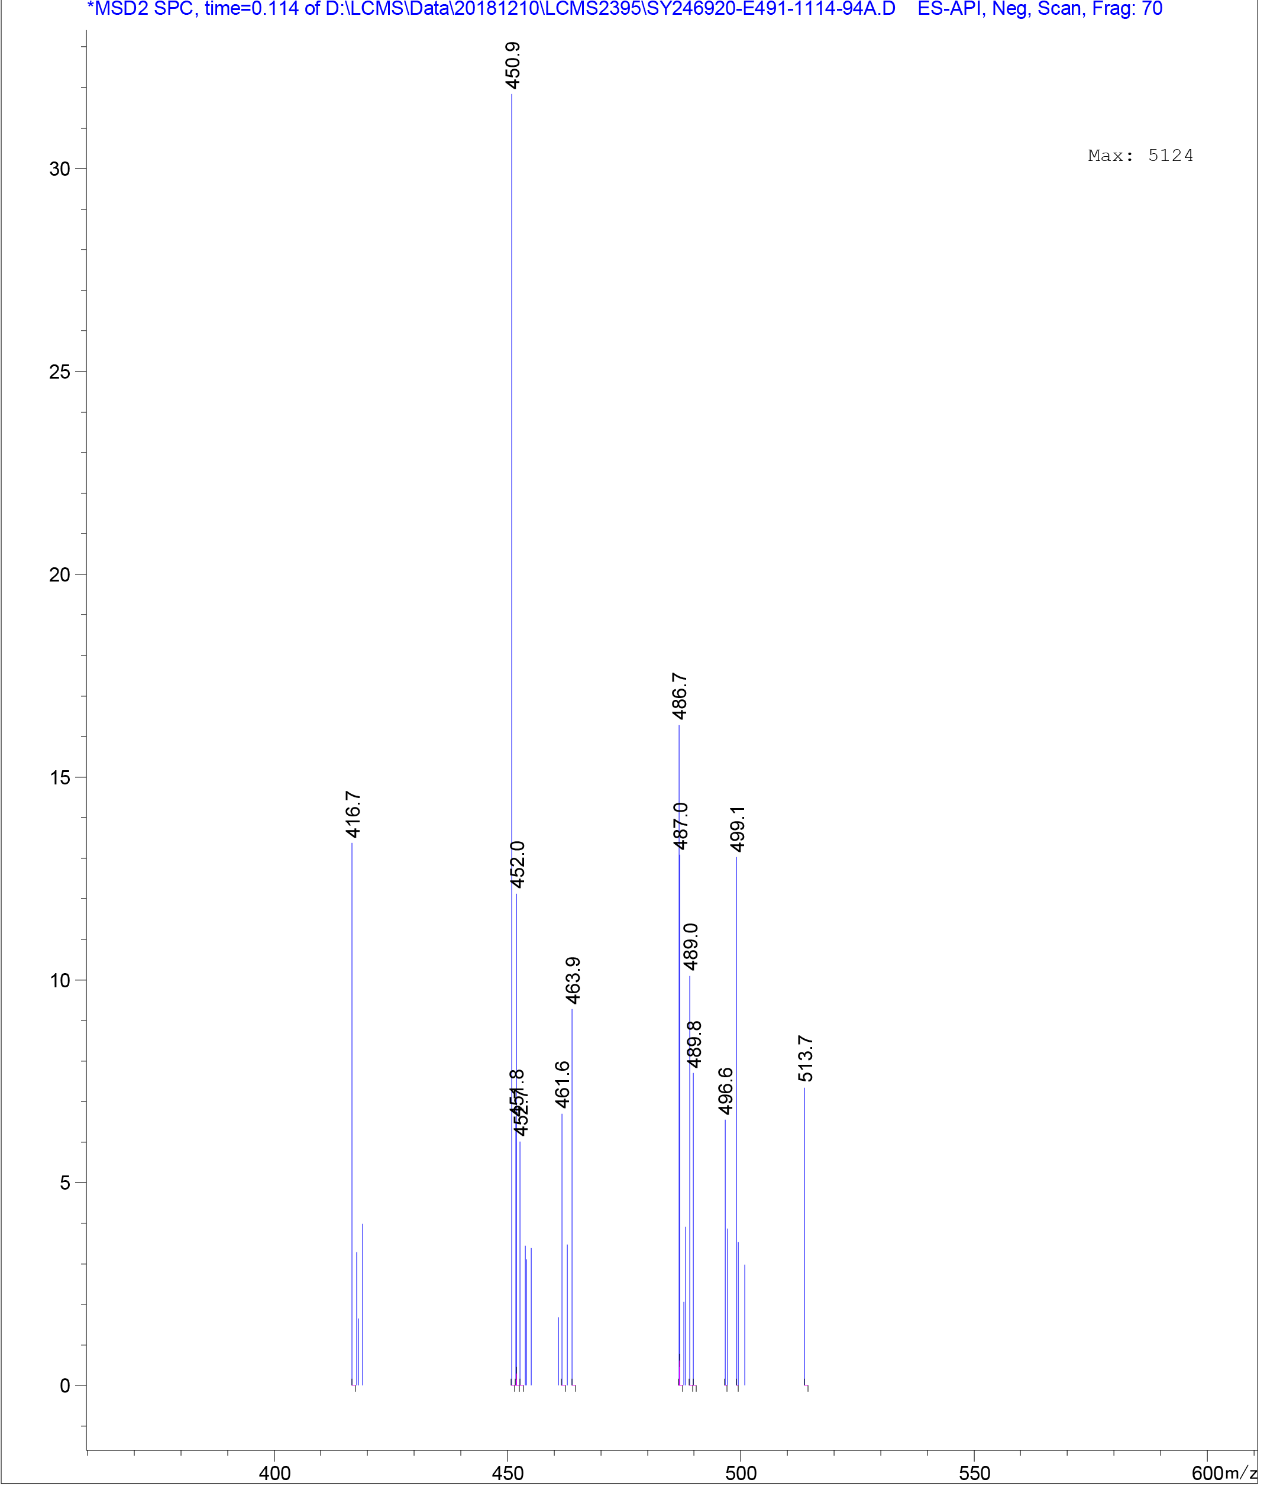


**Figure S**  76. ESI-MS of compound 6s


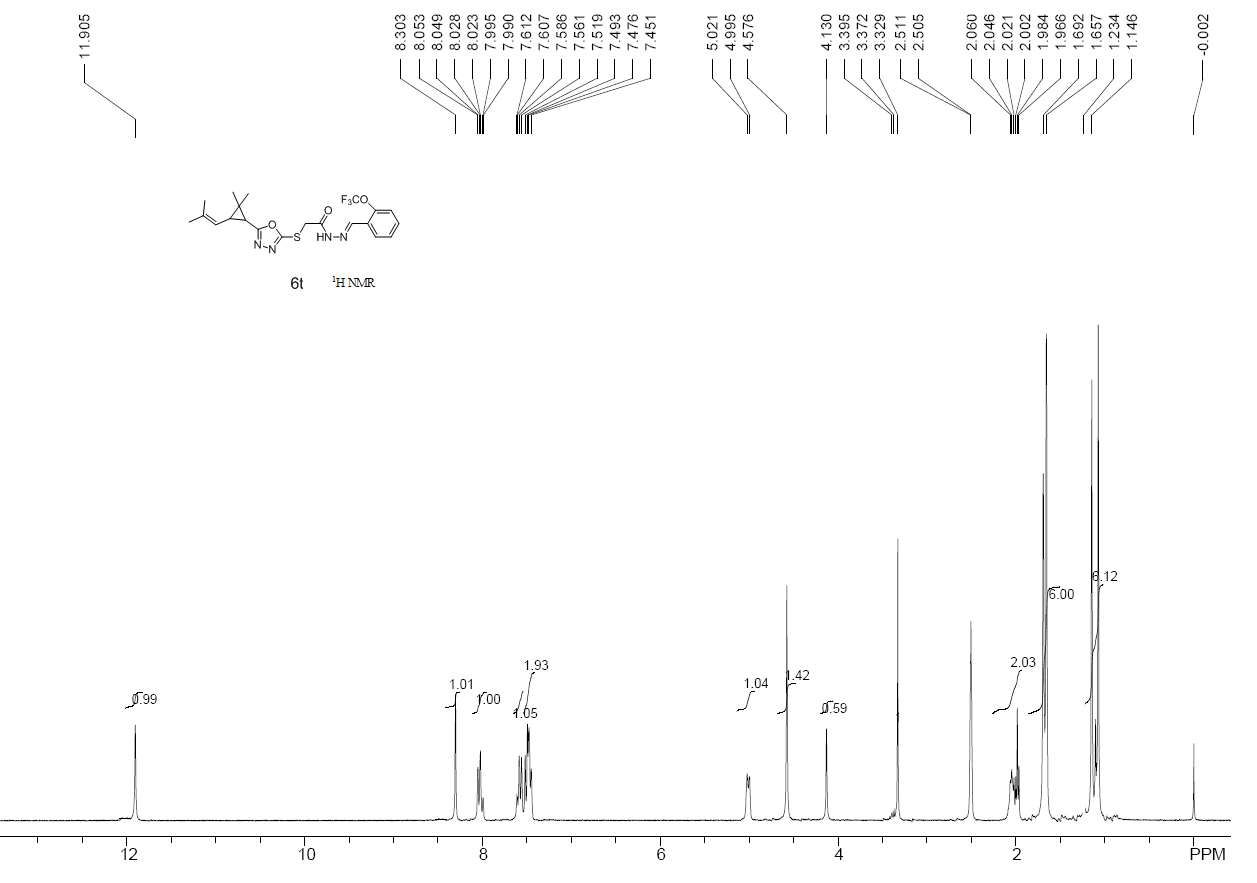


**Figure S**  77. 1H NMR of compound 6t


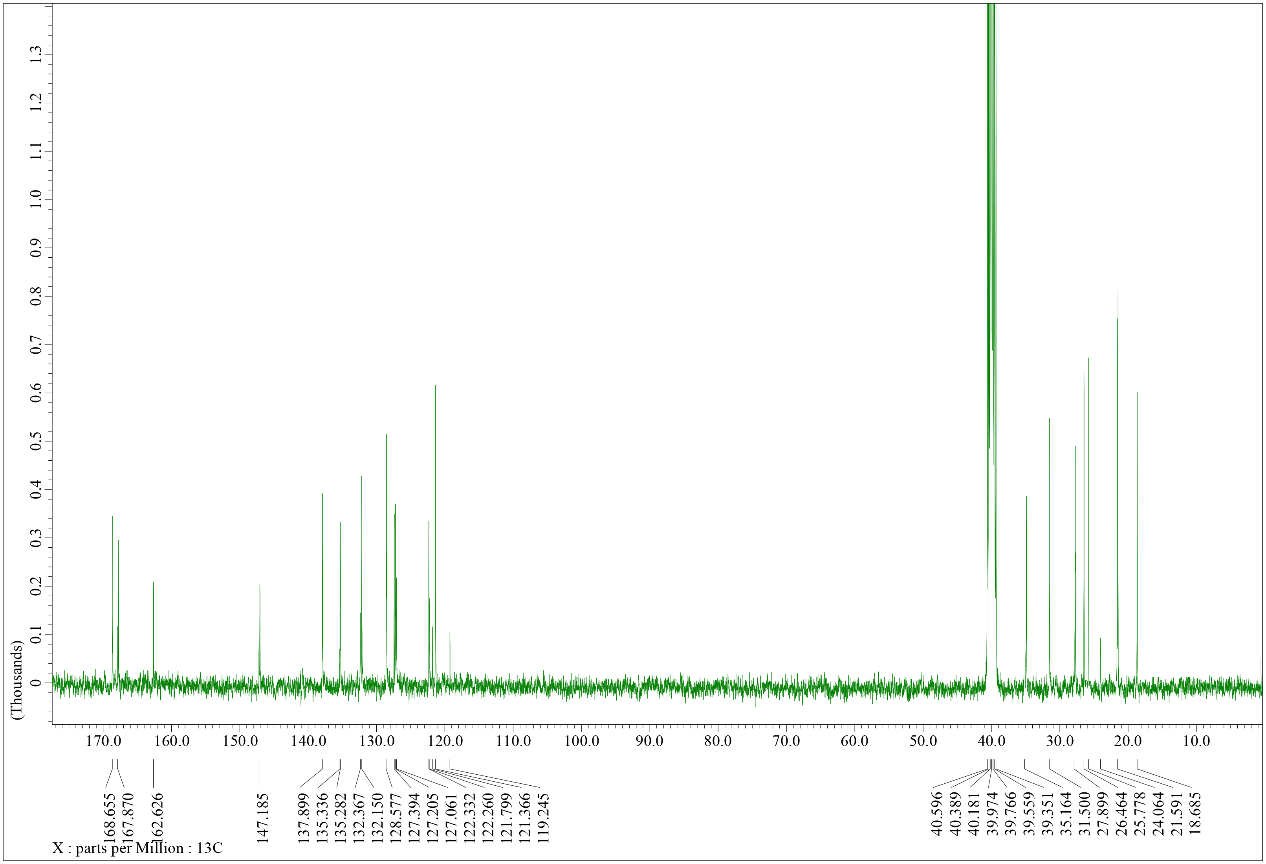


**Figure S**  78. 13C NMR of compound 6t


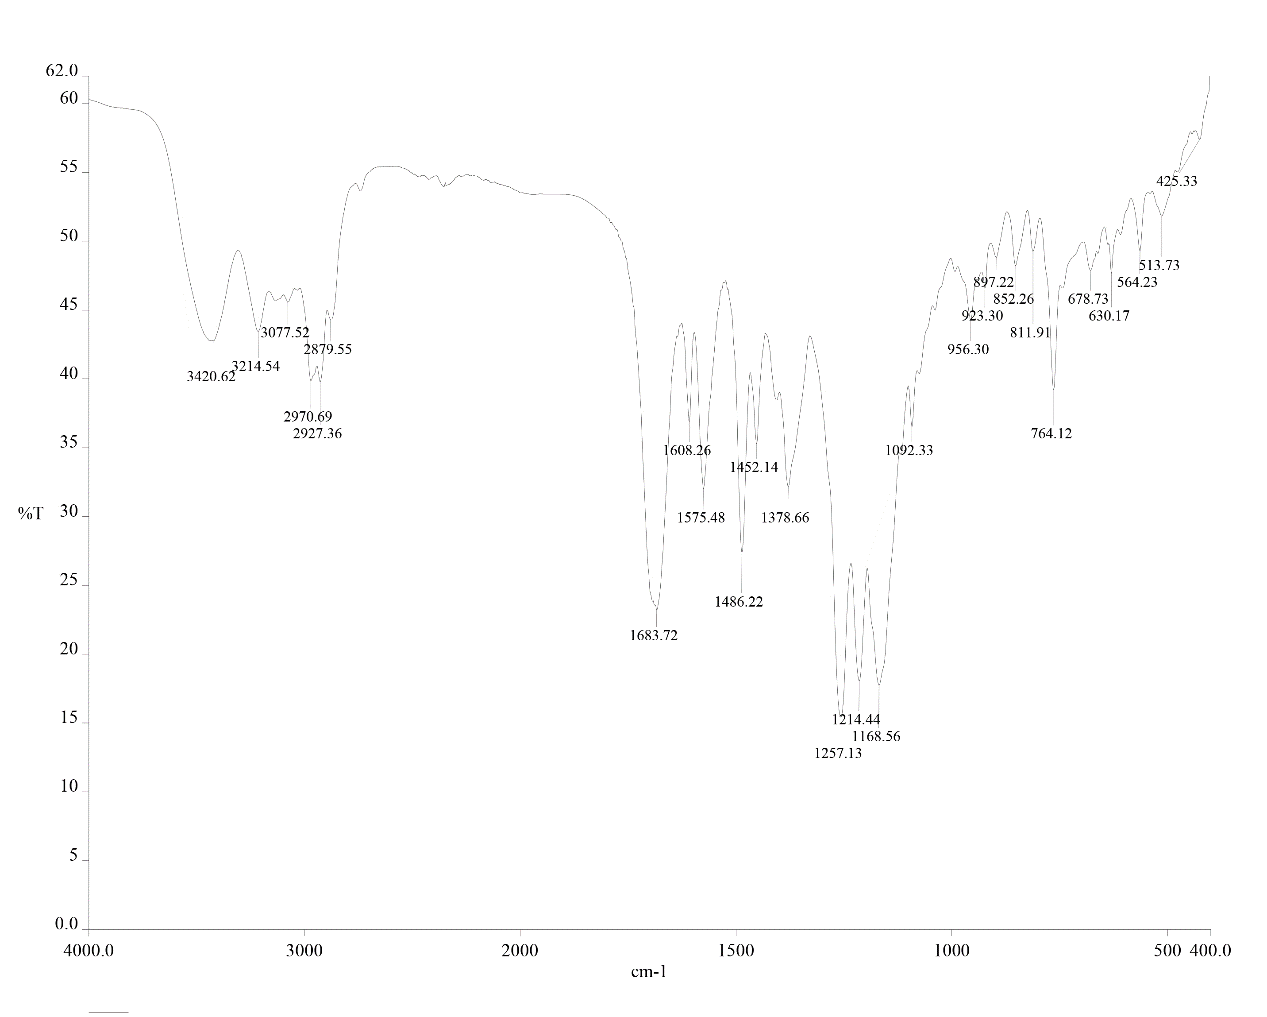


**Figure S**  79. IR of compound 6t


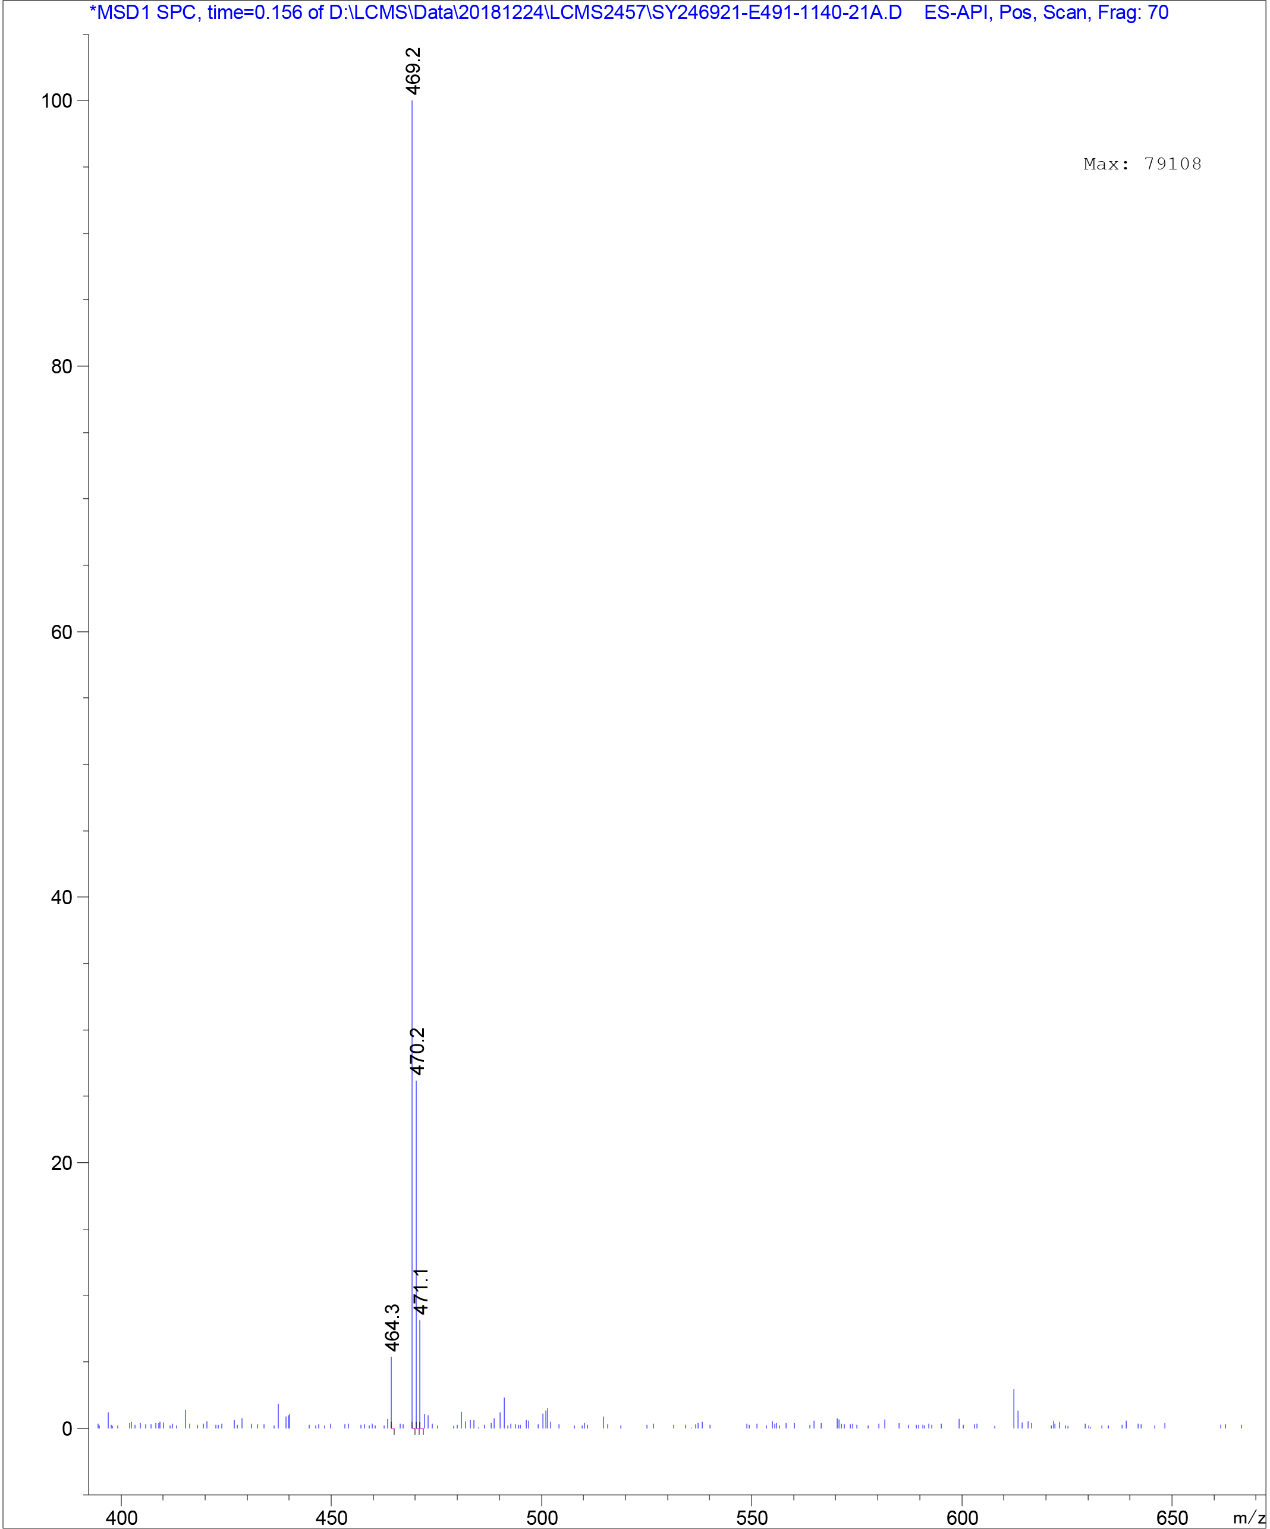


**Figure S**  80. ESI-MS of compound 6t


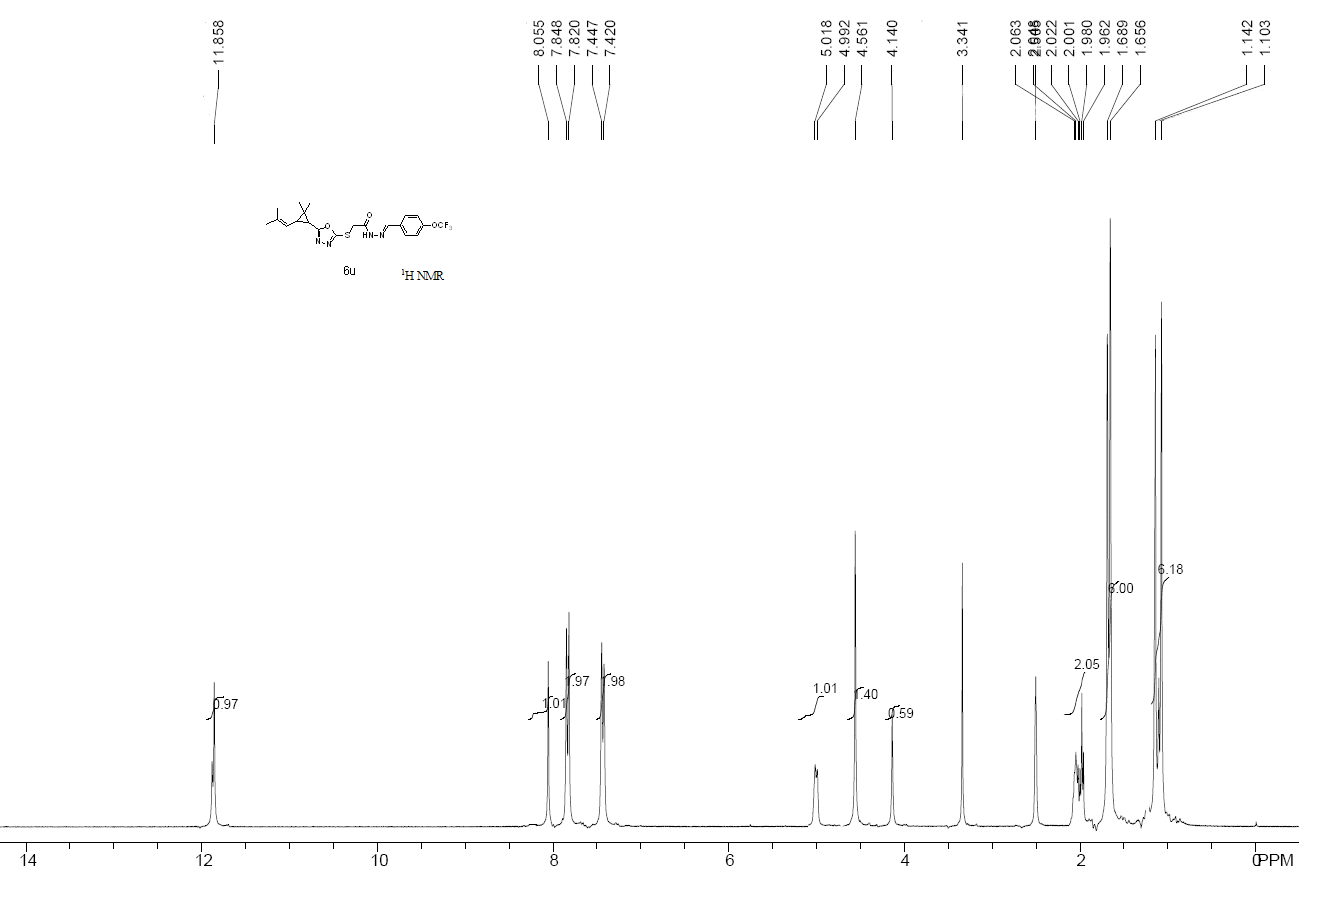


**Figure S**  81. 1H NMR of compound 6u


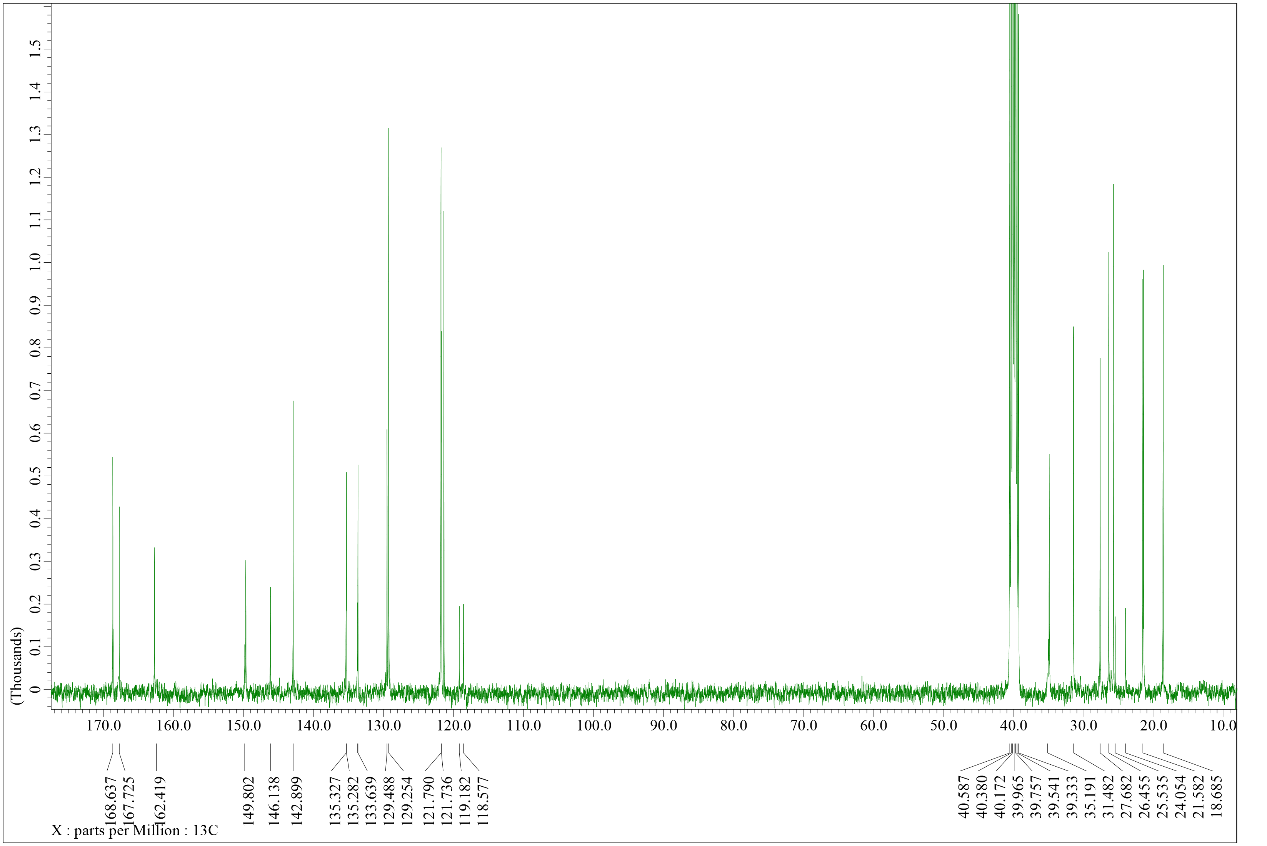


**Figure S**  82. 13C NMR of compound 6u


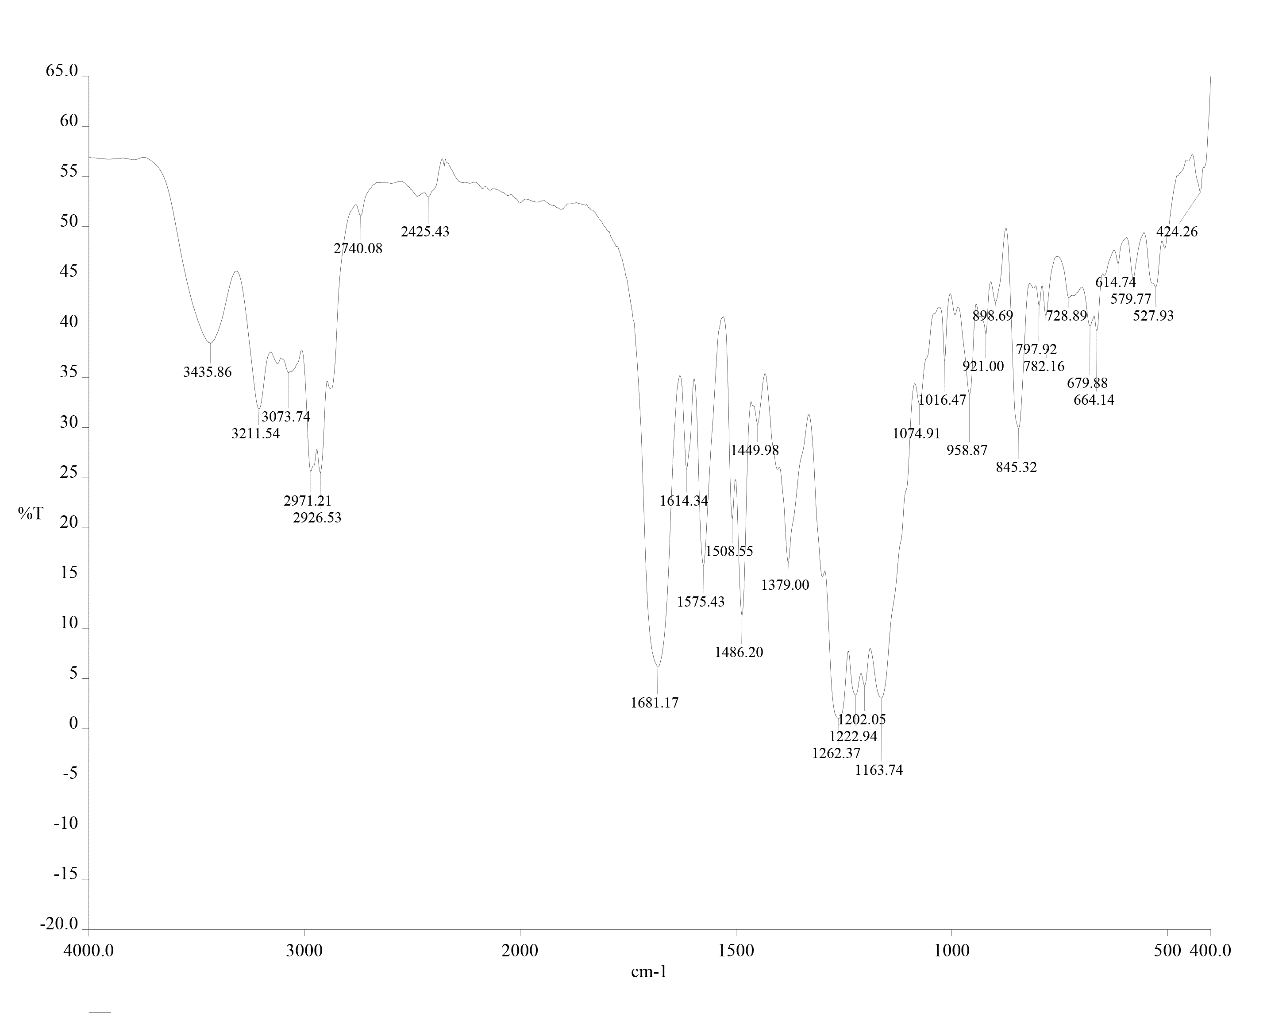


**Figure S**  83. IR of compound 6u


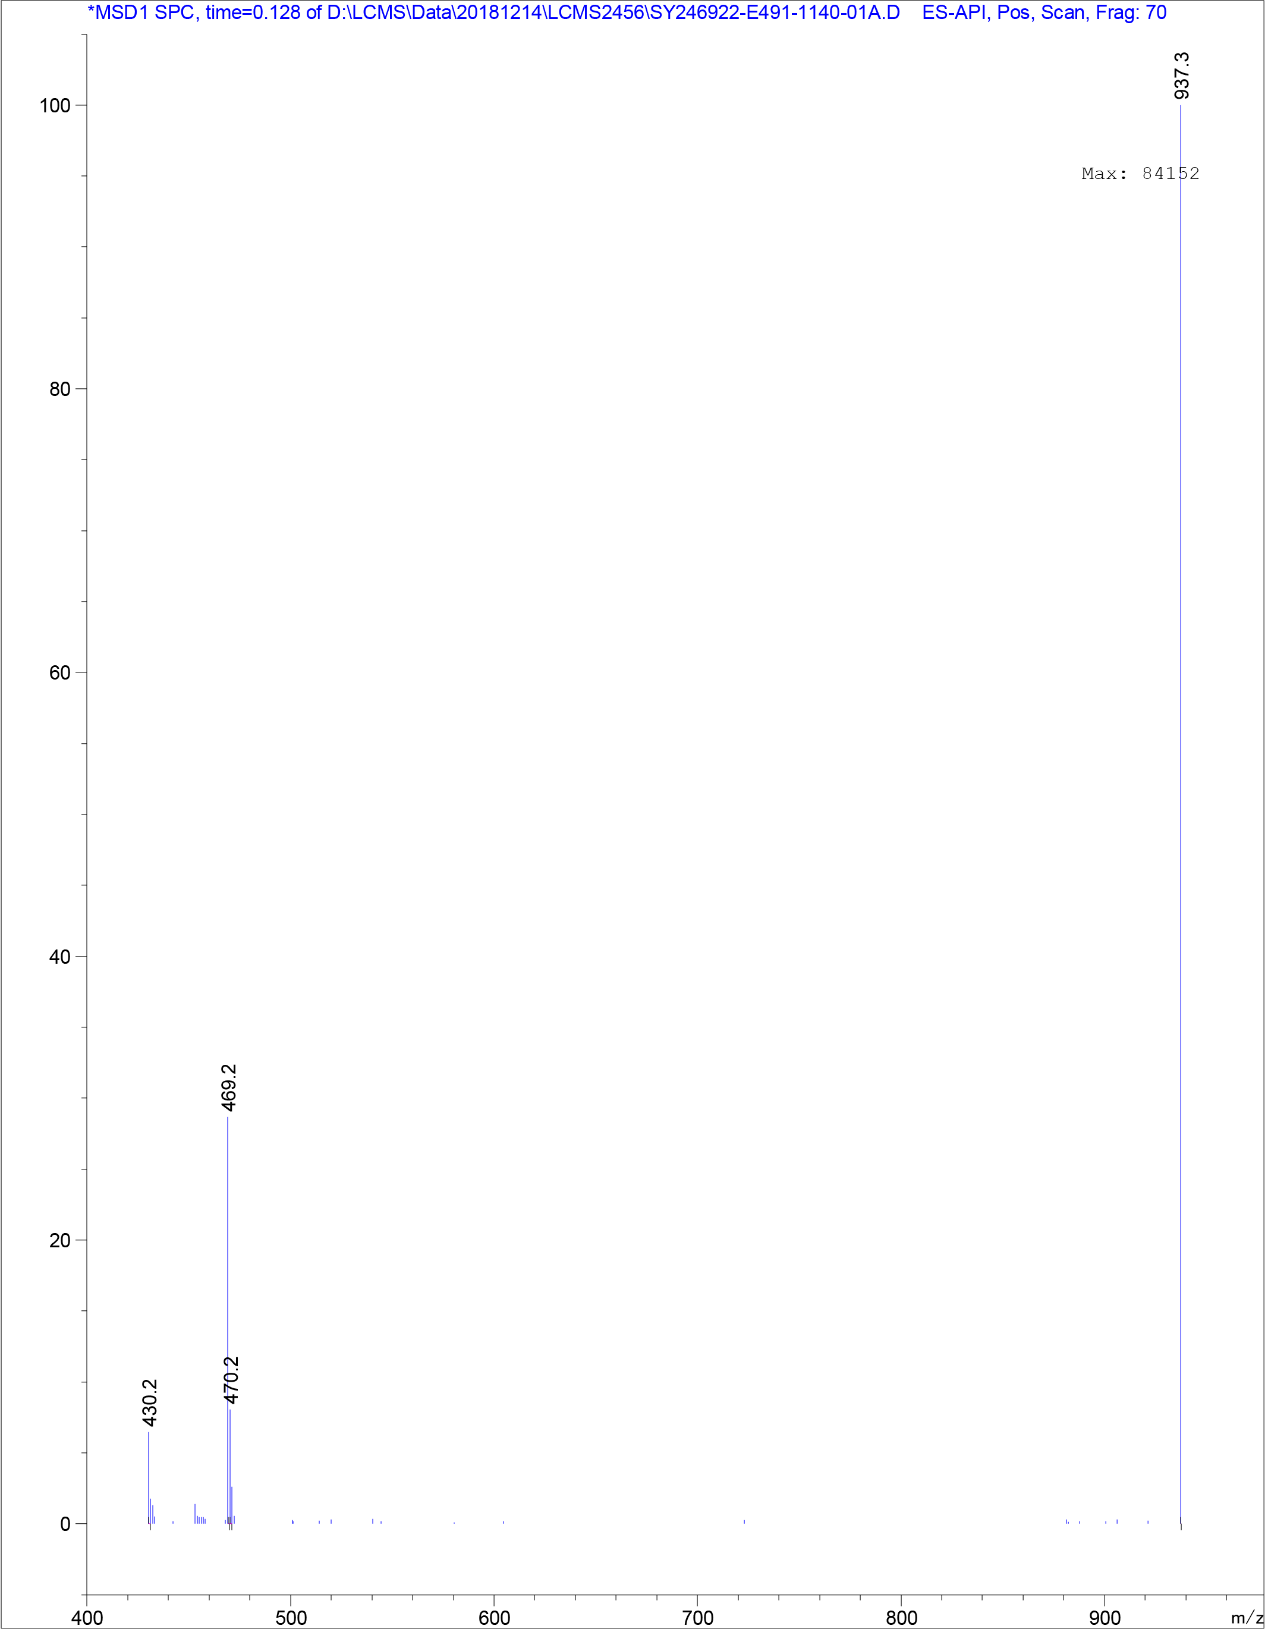


**Figure S**  84. ESI-MS of compound 6u
